# Supplementary material for: Insights into the Function of Long Noncoding RNAs in Sepsis Revealed by Gene Co-Expression Network Analysis
Source: Noncoding RNA. 2017 Jan 26;3(1):5. doi: 10.3390/ncrna3010005 (PMC5831999; doi:10.3390/ncrna3010005)
Supplement: Supplementary file 2 [file ncrna-03-00005-s002.txt]

#Agilent_ID	Reannotated_ID	type	Chromosome:Start-End_Strand	foldchange Elderly(SepsisVsControls)	p-value	Elderly(SepsisVsControls)	foldchange Adults(SepsisVsControls)	p-value Adults(SepsisVsControls)
A_19_P00315506	ENSG00000235750	protein_coding	chr1:175126796-175126856_-	1.25593543487745	0.2281	0.996343364525627	0.915435
A_19_P00315524	ENSG00000225783	lncRNA	chr22:27066385-27066445_+	3.25671021694645	0.00557797	6.01854543961596	0.00026577
A_19_P00315550	ENSG00000250742	lncRNA	chr12:54525992-54526052_+	1.2198351623025	0.1958	1.1056809449218	0.4669
A_19_P00315551	ENSG00000250742	lncRNA	chr12:54525887-54525947_+	1.40164760873715	0.0888	1.05230074309518	0.5951
A_19_P00315581	ENSG00000233723	lncRNA	chr2:59290656-59290716_+	1.40030196205391	0.0972	0.961226413971001	0.7265
A_19_P00315601	lnc-RLIM-2	lncRNA	chrX:73497973-73498033_-	1.81824414334264	0.0057	1.18281860434404	0.2911
A_19_P00315603	lnc-RLIM-2	lncRNA	chrX:73498126-73498186_-	1.90119158113632	0.0029	1.1524560654407	0.3546
A_19_P00315668	ENSG00000064393	protein_coding	chr7:139250611-139250671_-	1.95518109069136	0.0406411	2.16445878922496	0.0042
A_19_P00315716	ENSG00000225091	lncRNA	chr20:37055950-37056010_-	1.69232074631144	0.0159	1.24002156396128	0.38547
A_19_P00315717	ENSG00000237765	protein_coding	chr4:15688061-15688121_+	1.70348012332183	0.0137	1.73420270856694	0.0154
A_19_P00315718	ENSG00000237765	protein_coding	chr4:15688001-15688061_+	1.49551529567727	0.0561	1.60030129952739	0.0348
A_19_P00315753	ENSG00000243701	lncRNA	chr3:106966101-106966161_+	1.85418376180279	0.0044	1.59936472922781	0.0213
A_19_P00315764	ENSG00000255093	protein_coding	chr11:111327268-111327328_+	1.23404815705936	0.3009	1.29318136411567	0.2222
A_19_P00315810	ENSG00000232328	lncRNA	chr2:237642103-237642163_+	1.49983972268808	0.0643	1.51730073731561	0.0411
A_19_P00315824	ENSG00000267107	lncRNA	chr19:41985064-41985124_-	1.28929723894845	0.2426	1.00471369798906	0.983159
A_19_P00315843	ENSG00000234912	lncRNA	chr17:75085515-75085575_+	0.368325853964365	0.000338136	0.790097983063603	0.14776
A_19_P00315869	ENSG00000271997	lncRNA	chr15:89046025-89046085_-	1.80493274635065	0.0106	1.35045683317447	0.1906
A_19_P00315914	lnc-C9orf50-2	lncRNA	chr9:132265757-132265817_-	1.385419692735	0.0973	0.958111617557059	0.708925
A_19_P00315936	ENSG00000241163	lncRNA	chr3:72283298-72283358_-	1.76822268221105	0.0182	1.42665077621154	0.0865
A_19_P00315967	lnc-OSGIN1-1	lncRNA	chr16:83966325-83966385_+	0.888029471407386	0.415696	1.11074879784393	0.566702
A_19_P00316034	ENSG00000174365	protein_coding	chr20:37076159-37076219_+	1.31973980519116	0.1336	1.12822959986512	0.4248
A_19_P00316063	ENSG00000204054	lncRNA	chr9:132266022-132266082_+	1.32782828189921	0.323568	1.03788468519381	0.860298
A_19_P00316105	ENSG00000185513	protein_coding	chr20:42179486-42179546_+	0.578925526304529	0.0285431	0.669378642792555	0.0953596
A_19_P00316107	ENSG00000185513	protein_coding	chr20:42179366-42179426_+	0.699570538389993	0.1261	0.64540284309663	0.041
A_19_P00316159	ENSG00000223884	lncRNA	chr2:7217834-7217894_-	0.530680865611696	0.0176	0.937083430338277	0.619079
A_19_P00316185	lnc-HDAC2-2	lncRNA	chr6:113944432-113944492_-	1.62415040421271	0.025	1.40772894082191	0.1058
A_19_P00316202	ENSG00000245080	lncRNA	chr8:96085308-96085368_-	1.2549847402833	0.2408	1.08693146852488	0.486357
A_19_P00316326	ENSG00000073803	protein_coding	chr3:185003338-185003398_+	0.58917648220545	0.0115978	0.941113426264078	0.747641
A_19_P00316333	ENSG00000226328	lncRNA	chr22:45530170-45530230_-	0.791918318190986	0.1602	0.866525234860198	0.358938
A_19_P00316344	ENSG00000260193	lncRNA	chr9:138999621-138999681_-	1.48370020874574	0.0765	1.28072884439206	0.1952
A_19_P00316401	ENSG00000253123	lncRNA	chr8:37188354-37188414_-	0.619466063883165	0.0828	0.729321677109211	0.1899
A_19_P00316405	ENSG00000212719	protein_coding	chr17:21436018-21436078_-	1.21222350103127	0.361433	1.55279799674827	0.307963
A_19_P00316419	ENSG00000203875	protein_coding	chr6:86386847-86386907_-	0.512362483416643	0.00911175	0.54614665373702	0.0179
A_19_P00316423	lnc-DNAJA1-2	Poorly Annotated	chr9:33019599-33019659_-	1.14152007606061	0.556399	0.850025423529779	0.4836
A_19_P00316493	ENSG00000237720	lncRNA	chr2:2840712-2840772_-	0.948569039995657	0.768866	0.826310866600558	0.287
A_19_P00316511	ENSG00000181982	protein_coding	chr4:24810366-24810426_-	0.869037794005749	0.419916	1.27922600793663	0.2031
A_19_P00316512	ENSG00000248515	lncRNA	chr4:19457210-19457270_+	0.96856441498864	0.81067	1.06437667228049	0.5731
A_19_P00316541	ENSG00000203875	protein_coding	chr6:86387675-86387735_-	0.669087298648363	0.0526	0.672002858555329	0.0942
A_19_P00316547	ENSG00000250681	lncRNA	chr4:3634837-3634897_+	1.89074501748356	0.0059	1.22212119065593	0.546102
A_19_P00316629	ENSG00000103335	protein_coding	chr16:88815801-88815861_-	0.615825599636869	0.0672	0.539535308797497	0.0139
A_19_P00316657	lnc-FAM84B-8	lncRNA	chr8:128241105-128241165_-	1.13293983751847	0.5299	0.873109849928128	0.391981
A_19_P00316659	ENSG00000203875	protein_coding	chr6:86386840-86386900_-	0.546461258726392	0.0184419	0.589221483286784	0.0357
A_19_P00316701	ENSG00000203875	protein_coding	chr6:86386849-86386909_-	0.517907895077433	0.00935575	0.509515398615535	0.0089
A_19_P00316726	ENSG00000227671	pseudogene	chr1:247353185-247353245_-	1.46675117351824	0.0801	1.70919970664374	0.016
A_19_P00316745	ENSG00000204054	lncRNA	chr9:132265983-132266043_+	1.29268903301013	0.42023	1.07199890596816	0.768344
A_19_P00316753	ENSG00000249859	lncRNA	chr8:129111759-129111819_+	1.35575457361674	0.1689	1.21117531596313	0.2838
A_19_P00316758	ENSG00000073803	protein_coding	chr3:185009532-185009592_+	0.735823316947732	0.0944976	0.873900874737825	0.661433
A_19_P00316844	ENSG00000231074	lncRNA	chr6:30256491-30256551_-	1.4250381465688	0.1107	1.26242994096296	0.105146
A_19_P00316857	ENSG00000242086	lncRNA	chr3:195438611-195438671_+	1.73334762962358	0.0106	0.957103049960627	0.625942
A_19_P00316919	ENSG00000234912	lncRNA	chr17:75090408-75090468_+	0.943138713038166	0.669949	0.915441235468502	0.588822
A_19_P00317023	lnc-MYC-2	lncRNA	chr8:129004108-129004168_+	1.26676345156344	0.2126	0.619536293124438	0.0717
A_19_P00317052	ENSG00000173821	protein_coding	chr17:78302157-78302217_+	1.65352236993812	0.045391	1.89286757846032	0.0478911
A_19_P00317066	ENSG00000188897	protein_coding	chr16:11478744-11478804_-	1.60508633493653	0.0939148	0.977441797884132	0.541399
A_19_P00317082	ENSG00000231074	lncRNA	chr6:30260104-30260164_-	1.08884446307103	0.938811	0.934371220468902	0.576
A_19_P00317108	ENSG00000260032	lncRNA	chr20:34634047-34634107_-	1.06273096546244	0.953915	1.40620799623195	0.1206
A_19_P00317109	ENSG00000260032	lncRNA	chr20:34633543-34633603_-	1.21166948635672	0.3046	1.64668824528384	0.0309
A_19_P00317128	ENSG00000204054	lncRNA	chr9:132266147-132266207_+	1.3717552141938	0.217972	1.04350560185401	0.806818
A_19_P00317178	ENSG00000203875	protein_coding	chr6:86387687-86387747_-	0.641862068592925	0.0442	0.684985782885602	0.1005
A_19_P00317180	ENSG00000249859	lncRNA	chr8:129108780-129108840_+	1.15985901626524	0.4343	1.0592842329864	0.996341
A_19_P00317237	lnc-AC114947.1.1-2	lncRNA	chr5:43076387-43076447_+	1.00057185652263	0.96461	1.47166516332568	0.306539
A_19_P00317242	ENSG00000188897	protein_coding	chr16:11479189-11479249_-	2.11794356147041	0.0017	1.42722796552817	0.0943
A_19_P00317398	ENSG00000231074	lncRNA	chr6:30262607-30262667_-	1.35974092992139	0.1416	1.60633156465883	0.188315
A_19_P00317411	ENSG00000233621	lncRNA	chr1:37920481-37920541_-	1.10462717174866	0.5699	1.44280580334611	0.0867
A_19_P00317412	ENSG00000233621	lncRNA	chr1:37920541-37920601_-	1.42622267403449	0.1256	1.49414689361641	0.0625078
A_19_P00317444	ENSG00000204876	protein_coding	chr7:155758581-155758641_+	1.25719135105114	0.2057	1.00360194122634	0.967644
A_19_P00317447	ENSG00000240476	lncRNA	chr3:98700170-98700230_+	1.06386398150808	0.804019	2.11190436928659	0.298318
A_19_P00317473	ENSG00000203875	protein_coding	chr6:86387686-86387746_-	0.694623909079548	0.0714	0.679622519992285	0.0852
A_19_P00317504	ENSG00000206028	lncRNA	chr22:27064266-27064326_-	1.07783307977597	0.636523	1.04142025708162	0.830017
A_19_P00317550	ENSG00000247134	lncRNA	chr8:32902039-32902099_+	0.84598689223438	0.398885	0.918107396147863	0.598568
A_19_P00317597	ENSG00000267413	lncRNA	chr18:37421648-37421708_-	1.66256190277384	0.0218	1.38926898050055	0.1033
A_19_P00317653	ENSG00000242086	lncRNA	chr3:195435751-195435811_+	1.14516315166601	0.4129	1.10464036140136	0.4744
A_19_P00317683	ENSG00000204054	lncRNA	chr9:132266100-132266160_+	1.13905405298028	0.770966	0.92377635905518	0.5418
A_19_P00317732	ENSG00000261098	lncRNA	chr11:107182857-107182917_-	1.21646271737402	0.161346	1.33889532365779	0.249147
A_19_P00317743	ENSG00000203875	protein_coding	chr6:86387517-86387577_-	0.465438299606378	0.00979379	0.569742626485498	0.0213
A_19_P00317789	ENSG00000170846	lncRNA	chr4:6677457-6677517_+	0.409559998090034	0.0025	0.349998169905284	0.0001
A_19_P00317793	ENSG00000196756	protein_coding	chr20:37055074-37055134_-	1.1337535369807	0.4778	1.00186139683883	0.934535
A_19_P00317824	ENSG00000225470	lncRNA	chrX:73167092-73167152_+	0.839828287934616	0.3802	0.749218592965088	0.1938
A_19_P00317835	ENSG00000249201	lncRNA	chr5:1176089-1176149_-	1.20107826157403	0.4183	0.966279382521759	0.6442
A_19_P00317872	ENSG00000249859	lncRNA	chr8:128902857-128902917_+	1.6760251689908	0.0262	1.46303307993965	0.0528
A_19_P00317887	ENSG00000133030	protein_coding	chr17:17095836-17095896_+	0.562011021486927	0.0112014	0.287157502351199	0.000301633
A_19_P00317897	ENSG00000203739	lncRNA	chr1:173387178-173387238_-	3.50227614196241	7.30067e-05	2.86978672145109	7.17259e-05
A_19_P00317984	ENSG00000203875	protein_coding	chr6:86387677-86387737_-	0.675810019729234	0.0599	0.668571236647541	0.083
A_19_P00318013	ENSG00000174365	protein_coding	chr20:37079503-37079563_+	0.9839606673596	0.845014	0.802945325505783	0.3567
A_19_P00318014	ENSG00000174365	protein_coding	chr20:37079223-37079283_+	1.09732189770128	0.606015	1.0526520740133	0.612382
A_19_P00318085	ENSG00000231074	lncRNA	chr6:30262370-30262430_-	0.901427395148523	0.5461	0.895782714324014	0.5475
A_19_P00318110	ENSG00000231074	lncRNA	chr6:30260274-30260334_-	1.2455776710211	0.2866	1.03300464543543	0.763615
A_19_P00318152	ENSG00000174365	protein_coding	chr20:37075376-37075436_+	1.16497535699913	0.3529	1.60233067610972	0.0297
A_19_P00318189	ENSG00000196295	protein_coding	chr7:30601441-30601501_-	1.14307825839464	0.2883	1.04981938498757	0.78541
A_19_P00318213	ENSG00000231074	lncRNA	chr6:30282045-30282105_-	1.24483114677934	0.562395	1.39337649317877	0.106368
A_19_P00318243	ENSG00000249201	lncRNA	chr5:1178609-1178669_-	1.17036305034949	0.435	1.07474599312114	0.5417
A_19_P00318261	ENSG00000212421	lncRNA	chr4:53614345-53614415_+\chr2:10230342-10230399_-\chr4:53579466-53579526_+\chr9:89875420-89875480_+	1.19213305779948	0.709239	1.21608746460225	0.244579
A_19_P00318284	ENSG00000233723	lncRNA	chr2:59252004-59252064_+	1.35513268354688	0.1578	0.978206342287866	0.834803
A_19_P00318304	ENSG00000196756	protein_coding	chr20:37055064-37055124_-	1.06816226211299	0.557112	0.907424916048537	0.6132
A_19_P00318404	ENSG00000250334	lncRNA	chr4:80497541-80497601_+	1.21217924706492	0.3262	0.868829750845837	0.4621
A_19_P00318409	ENSG00000245532	lncRNA	chr11:65192208-65192268_+	1.61816905939313	0.115484	0.88736950690257	0.519174
A_19_P00318494	ENSG00000153363	pseudogene	chr1:211605755-211605815_+	0.997167718154531	0.97342	1.15857415379307	0.423717
A_19_P00318495	ENSG00000153363	pseudogene	chr1:211605689-211605749_+	0.871388756066473	0.3875	1.23452899795315	0.510184
A_19_P00318531	ENSG00000168172	protein_coding	chr8:42885399-42885459_+	1.10238946887419	0.605817	1.29975809039504	0.1679
A_19_P00318533	ENSG00000168172	protein_coding	chr8:42885274-42885334_+	1.02126169256696	0.941905	1.15192676718647	0.3266
A_19_P00318568	ENSG00000188897	protein_coding	chr16:11477498-11477558_-	1.43217926126092	0.1109	1.00297315262209	0.946446
A_19_P00318587	ENSG00000272523	lncRNA	chr5:108063647-108063707_-	1.24874630274489	0.2204	0.926789453733169	0.6311
A_19_P00318599	lnc-C5orf39-1	lncRNA	chr5:43016177-43016237_-	1.18733791542445	0.4016	1.3817322489497	0.1531
A_19_P00318600	lnc-C5orf39-1	lncRNA	chr5:43016283-43016343_-	0.93877544342246	0.909068	1.46650600583298	0.18269
A_19_P00318641	ENSG00000228439	lncRNA	chr6:99968963-99969023_+	0.965624411358598	0.818808	1.1200139269825	0.713867
A_19_P00318715	ENSG00000231721	lncRNA	chr7:130737216-130737276_-	1.20228831430604	0.3414	0.633545890312473	0.0385
A_19_P00318741	ENSG00000205054	lncRNA	chr2:45550176-45550236_-	1.60204910417726	0.0234	1.41605561473722	0.0954
A_19_P00318813	ENSG00000262188	lncRNA	chr17:77899141-77899201_+	1.26148393907187	0.2704	0.935659356200978	0.6454
A_19_P00318831	ENSG00000231074	lncRNA	chr6:30262624-30262684_-	1.69313054784509	0.0876407	0.980032804835576	0.845389
A_19_P00318878	ENSG00000259865	lncRNA	chr1:247350777-247350837_-	0.99625633146335	0.968803	1.43839962506632	0.0753
A_19_P00318883	ENSG00000214293	lncRNA	chr7:77314578-77314638_-	0.73869580414814	0.0883	0.504808026592105	0.0052
A_19_P00318915	ENSG00000249859	lncRNA	chr8:129082469-129082529_+	1.66490825617115	0.0262	1.62914816628937	0.0312
A_19_P00319019	ENSG00000203875	protein_coding	chr6:86386841-86386901_-	0.533909875831223	0.0142882	0.592943067395201	0.0353
A_19_P00319095	ENSG00000203875	protein_coding	chr6:86387140-86387200_-	0.52287195972827	0.0124	0.501288069298851	0.0058
A_19_P00319099	lnc-RAD23B-2	lncRNA	chr9:110102971-110103031_+	1.61270689612777	0.0233	1.23034316071429	0.2308
A_19_P00319147	ENSG00000224078	lncRNA	chr15:25362591-25362651_+	1.25499705551	0.2882	1.09792070273331	0.4798
A_19_P00319236	ENSG00000226903	lncRNA	chr13:112555112-112555172_+	1.23207500573433	0.452396	1.29633996449764	0.1929
A_19_P00319295	lnc-MAVS-1	lncRNA	chr20:3856710-3856770_+	1.49817762134007	0.0587	1.36850925619286	0.1119
A_19_P00319372	ENSG00000242086	lncRNA	chr3:195438479-195438539_+	1.08539418272124	0.553	1.35332425852022	0.0898
A_19_P00319465	lnc-MAVS-1	lncRNA	chr20:3855581-3855641_+	1.3641201775127	0.1356	1.102469025696	0.4584
A_19_P00319476	lnc-LTBP3-2	lncRNA	chr11:65266957-65267017_-	1.12543998530255	0.630676	0.639371173986433	0.0407
A_19_P00319525	ENSG00000228439	lncRNA	chr6:99979594-99979654_+	1.16424134830881	0.821837	1.45277163395028	0.0883176
A_19_P00319608	lnc-SLC35F5-19	lncRNA	chr2:114735730-114735790_-	0.963015307357279	0.749618	1.79368354540003	0.0164444
A_19_P00319623	ENSG00000225470	lncRNA	chrX:73164236-73164296_+	0.682454836745958	0.0889	0.733006967113493	0.1641
A_19_P00319633	lnc-PSMB9-6	lncRNA	chr6:32862331-32862391_+	1.43874069614485	0.0723	1.60151704527028	0.0255
A_19_P00319640	ENSG00000232084	lncRNA	chr2:100859285-100859345_+	1.29317160262192	0.2369	1.03875844965133	0.762133
A_19_P00319675	ENSG00000204054	lncRNA	chr9:132265978-132266038_+	1.3006722334475	0.348811	0.987785897029122	0.914945
A_19_P00319682	ENSG00000124831	protein_coding	chr2:238536263-238536323_+	1.88952915618496	0.00548959	1.2109269975767	0.525873
A_19_P00319721	lnc-PANK1-2	lncRNA	chr10:91451187-91451247_-	1.40304495037067	0.1133	2.442060936598	0.0007
A_19_P00319779	ENSG00000224078	lncRNA	chr15:25245461-25245521_+	1.31689464839386	0.19329	0.69102697874604	0.106603
A_19_P00320047	lnc-AC069257.9.1-4	lncRNA	chr3:195438070-195438175_+\chr3:195437710-195437815_+\chr3:195437350-195437410_+\chr3:195437530-195437590_+	2.05713117492785	0.0015	0.86573343040145	0.679098
A_19_P00320056	ENSG00000231074	lncRNA	chr6:30258577-30258637_-	0.965657146056972	0.839467	0.85500811891584	0.399704
A_19_P00320067	ENSG00000223764	protein_coding	chr1:852245-852305_-	1.12942345591327	0.456199	1.14878537446972	0.311412
A_19_P00320090	ENSG00000234912	lncRNA	chr17:75090875-75090935_+	0.780999602548239	0.1952	0.524346543980243	0.0066
A_19_P00320094	ENSG00000203875	protein_coding	chr6:86387674-86387734_-	0.678605655220737	0.0876	0.646558803435985	0.0622
A_19_P00320119	ENSG00000253352	lncRNA	chr22:31374004-31374064_+	1.47891581065465	0.0682	0.872250075613175	0.4273
A_19_P00320120	ENSG00000253352	lncRNA	chr22:31373922-31373982_+	1.40533665404228	0.1111	0.787539825711981	0.2269
A_19_P00320132	ENSG00000225470	lncRNA	chrX:73164180-73164240_+	0.66511496418154	0.077	0.635056372413581	0.0573
A_19_P00320158	ENSG00000129657	protein_coding	chr17:75089354-75089414_+	1.25921328044315	0.1943	1.04641176377919	0.788439
A_19_P00320218	ENSG00000233806	lncRNA	chr2:242823569-242823629_+	1.05295308622927	0.5846	1.03820623164521	0.962565
A_19_P00320242	ENSG00000224078	lncRNA	chr15:25246687-25246747_+	0.574986642197227	0.0617714	0.228572787520166	0.000190842
A_19_P00320259	ENSG00000226887	protein_coding	chr4:53617688-53617748_-	1.4202908608935	0.1121	1.10098384094943	0.636624
A_19_P00320314	lnc-C5orf39-2	lncRNA	chr5:42991196-42991256_-	1.25088258584999	0.2833	1.07870476803035	0.5369
A_19_P00320351	ENSG00000223768	lncRNA	chr21:46713221-46713281_+	1.35595405556668	0.1395	1.42894818738448	0.1079
A_19_P00320384	ENSG00000186312	pseudogene	chrX:15715759-15715819_+	1.14596074077696	0.4434	0.913713808431193	0.5838
A_19_P00320396	ENSG00000231074	lncRNA	chr6:30262503-30262563_-	0.678359799886531	0.1241	1.11987720490173	0.730176
A_19_P00320434	ENSG00000227403	lncRNA	chr2:162105011-162105071_+	1.22510647850412	0.358053	2.69371333692634	0.000425232
A_19_P00320449	ENSG00000204054	lncRNA	chr9:132265944-132266004_+	1.27083845493116	0.270699	0.943317957109093	0.6275
A_19_P00320532	ENSG00000224078	lncRNA	chr15:25364495-25364555_+	1.74285333376249	0.0136	1.02031447374713	0.965583
A_19_P00320579	ENSG00000231721	lncRNA	chr7:130792535-130792595_-	1.38542577727964	0.1633	0.906246046023578	0.6038
A_19_P00320597	ENSG00000235505	pseudogene	chr11:104779626-104779686_-	1.03441301319515	0.782002	1.0160517021163	0.974169
A_19_P00320602	ENSG00000204054	lncRNA	chr9:132266205-132266265_+	1.39268430380278	0.283933	1.01956291446089	0.894264
A_19_P00320611	ENSG00000272635	pseudogene	chr19:28284504-28284564_+	1.49342421839966	0.0403	1.55646034709346	0.0382
A_19_P00320640	ENSG00000225470	lncRNA	chrX:73164441-73164501_+	0.692429991632513	0.0839	0.653278918042345	0.0653
A_19_P00320664	ENSG00000225177	lncRNA	chr6:139018101-139018161_+	1.06256762124209	0.592058	0.997912493064359	0.995064
A_19_P00320665	ENSG00000225177	lncRNA	chr6:139018041-139018101_+	1.23309253719331	0.2823	0.927893735884213	0.57844
A_19_P00320708	ENSG00000006625	protein_coding	chr7:30590330-30590390_-	1.35917783545634	0.191	1.12429292688823	0.4517
A_19_P00320719	ENSG00000198625	protein_coding	chr1:204526930-204526990_+	0.852499968194914	0.4359	0.797180233592781	0.2788
A_19_P00320721	ENSG00000198625	protein_coding	chr1:204526415-204526475_+	1.13170024965959	0.4323	0.942613539790379	0.6167
A_19_P00320729	ENSG00000166446	protein_coding	chr16:80631893-80631953_-	0.798922500739135	0.456889	1.73816164176636	0.0384
A_19_P00320749	ENSG00000249859	lncRNA	chr8:129082441-129082501_+	1.65226062636278	0.0247	1.3802856136664	0.1185
A_19_P00320757	lnc-C5orf39-1	lncRNA	chr5:42991073-42991133_-\chr5:43016991-43017051_-	1.23748531946277	0.2338	1.24394826871905	0.2306
A_19_P00320759	lnc-C5orf39-2	lncRNA	chr5:42990944-42991004_-	1.42408750966524	0.1039	1.17644944808047	0.3628
A_19_P00320792	ENSG00000174365	protein_coding	chr20:37076116-37076176_+	1.48277606697668	0.0512	1.02623061733366	0.897012
A_19_P00320796	ENSG00000253352	lncRNA	chr22:31373663-31373723_+	1.47977250518247	0.0683	0.813782701474321	0.3514
A_19_P00320866	ENSG00000233901	lncRNA	chr9:132104262-132104322_+	2.05887657621371	0.0036324	2.07828296368652	0.0016
A_19_P00320885	ENSG00000253123	lncRNA	chr8:37188335-37188395_-	1.20749689671863	0.296	1.11641538640875	0.510731
A_19_P00320914	ENSG00000225470	lncRNA	chrX:73164429-73164489_+	0.624539181002522	0.0448	0.633244177487742	0.0494
A_19_P00320948	ENSG00000237765	protein_coding	chr4:15683471-15683531_+	1.28169323613967	0.1955	1.58253580921234	0.0434
A_19_P00320954	ENSG00000237803	lncRNA	chr2:38067326-38067386_-	1.40378058013448	0.0969	1.25183489762473	0.2544
A_19_P00320966	ENSG00000245164	lncRNA	chr8:126963432-126963492_-	1.4122795554057	0.1011	1.1751349980558	0.3612
A_19_P00320970	ENSG00000249131	lncRNA	chr5:139121077-139121137_-	1.42797794052628	0.214225	1.12675815236921	0.4624
A_19_P00321014	ENSG00000169239	Poorly Annotated	chrX:15716352-15716412_+	2.77268769898173	0.043594	1.86766164435434	0.0077
A_19_P00321067	ENSG00000225783	lncRNA	chr22:27066321-27066381_+	3.48669397074351	0.00297598	5.69117416225604	0.000126801
A_19_P00321068	ENSG00000225783	lncRNA	chr22:27066258-27066318_+	3.3323230669846	0.00651169	5.1951829765421	0.000121037
A_19_P00321089	ENSG00000204054	lncRNA	chr9:132269074-132269134_+	1.75198671988797	0.0116907	0.992191499402955	0.979893
A_19_P00321136	ENSG00000073803	protein_coding	chr3:185009630-185009690_+	0.787961148421609	0.137823	0.917668214775109	0.893919
A_19_P00321143	lnc-PSMB9-6	lncRNA	chr6:32862644-32862704_+	0.569019925782695	0.0365	0.785489721247121	0.2093
A_19_P00321166	lnc-C5orf39-1	lncRNA	chr5:43065530-43065590_-	0.741868559570251	0.25027	1.36278025898406	0.195895
A_19_P00321202	ENSG00000233280	protein_coding	chr3:97562045-97562105_+	0.942007706535925	0.728302	0.805890299163599	0.306237
A_19_P00321230	lnc-FAM193B-3	lncRNA	chr5:177045668-177045728_-	1.69869665228212	0.0121	2.06958022288901	0.00458726
A_19_P00321259	ENSG00000224259	lncRNA	chr1:159948635-159948695_+	1.93204209022588	0.0018	1.12658400065996	0.346789
A_19_P00321266	ENSG00000223546	lncRNA	chrX:102080962-102081022_+	1.63993874636901	0.0139	1.0308557527264	0.897946
A_19_P00321303	ENSG00000204054	lncRNA	chr9:132265981-132266041_+	1.3293228318969	0.38408	1.01926924437662	0.957835
A_19_P00321332	ENSG00000245532	lncRNA	chr11:65193884-65193944_+	1.1654096504276	0.449677	0.606672369876821	0.0832046
A_19_P00321333	ENSG00000245532	lncRNA	chr11:65193577-65193637_+	1.2360748518394	0.24643	0.670202982670253	0.0643343
A_19_P00321342	ENSG00000164989	pseudogene	chr9:16060952-16061012_+	1.44028467102157	0.1032	1.1538887761846	0.4088
A_19_P00321361	ENSG00000231721	lncRNA	chr7:130628932-130628992_-	1.01917552280817	0.959059	0.802334663893452	0.3008
A_19_P00321364	ENSG00000225470	lncRNA	chrX:73164422-73164482_+	0.642178441616359	0.0759	0.685497650854469	0.0977
A_19_P00321388	ENSG00000227036	lncRNA	chr17:70418997-70419057_-	1.08593666136784	0.5319	1.3706478088378	0.0944
A_19_P00321461	ENSG00000248161	lncRNA	chr4:103340420-103340480_-	1.38460061479096	0.1167	1.94801299124524	0.0048
A_19_P00321466	lnc-PSMB9-6	lncRNA	chr6:32862743-32862803_+	0.89616877229662	0.548955	1.6487482737936	0.0183
A_19_P00321471	ENSG00000231074	lncRNA	chr6:30260130-30260190_-	0.953190837722161	0.822186	1.0069908671685	0.893519
A_19_P00321473	ENSG00000231074	lncRNA	chr6:30260302-30260362_-	1.09371561749566	0.5157	1.01949088383286	0.822705
A_19_P00321511	ENSG00000203875	protein_coding	chr6:86387511-86387571_-	0.465291912030796	0.0110471	0.57601500005285	0.0191
A_19_P00321521	ENSG00000225470	lncRNA	chrX:73164179-73164239_+	0.69436121964776	0.0808	0.710090390879137	0.0954
A_19_P00321546	ENSG00000203875	protein_coding	chr6:86386825-86386885_-	0.527249547058255	0.019252	0.631987390294739	0.047
A_19_P00321568	lnc-CTD-2523D13.1.1-1	lncRNA	chr11:119617102-119617162_+	1.59522158077673	0.0301	1.32648987586511	0.1526
A_19_P00321588	ENSG00000227051	protein_coding	chr14:96556333-96556393_+	1.69148997433063	0.0147	1.195842301614	0.3077
A_19_P00321613	ENSG00000225470	lncRNA	chrX:73164197-73164257_+	0.591120923112124	0.0316	0.735778732140961	0.1547
A_19_P00321617	ENSG00000229656	lncRNA	chr10:33370677-33370737_+	1.24264392815085	0.3101	1.16212690472184	0.389
A_19_P00321618	ENSG00000212766	lncRNA	chr15:69373245-69373305_+	0.645167976554772	0.0618	0.853966023359905	0.364858
A_19_P00321628	ENSG00000240024	pseudogene	chr3:183165675-183165735_+	1.06484097508162	0.5179	1.27780446365961	0.2136
A_19_P00321658	ENSG00000214145	lncRNA	chr3:194023561-194023621_-	1.44117674229231	0.0796	1.0622125071368	0.5937
A_19_P00321670	ENSG00000223469	lncRNA	chr6:43819859-43819919_-	1.21942786535218	0.2526	0.894963085160522	0.4531
A_19_P00321722	ENSG00000243797	lncRNA	chr7:106102511-106102571_-	1.23084548961463	0.3156	0.811988413749721	0.3521
A_19_P00321781	ENSG00000258929	lncRNA	chr14:50504926-50504986_-	1.66932884766988	0.016	1.70295966110223	0.0257746
A_19_P00321789	ENSG00000236166	lncRNA	chr6:132420298-132420358_+	1.00519157185594	0.922681	1.53755007546853	0.0303
A_19_P00321795	ENSG00000225470	lncRNA	chrX:73167108-73167168_+	0.87188307170238	0.4243	0.776132746563794	0.2646
A_19_P00321872	ENSG00000251381	lncRNA	chr11:13001640-13001700_-	1.00105596939814	0.647637	1.20619088058006	0.2824
A_19_P00321878	lnc-PSMB9-6	lncRNA	chr6:32862694-32862754_+	0.864088364664463	0.611991	1.08896872802812	0.583857
A_19_P00321885	ENSG00000231721	lncRNA	chr7:130628939-130628999_-	1.0778584218094	0.646954	0.756689943730808	0.1533
A_19_P00321886	ENSG00000231721	lncRNA	chr7:130629049-130629109_-	0.997529425854606	0.816542	0.737832280035058	0.1449
A_19_P00321977	lnc-LTBP3-2	lncRNA	chr11:65267487-65267547_-	1.87543435029443	0.0038	1.11455085233396	0.416
A_19_P00322002	ENSG00000231721	lncRNA	chr7:130629567-130629627_-	1.46982144902784	0.369114	0.815051900805246	0.3107
A_19_P00322080	ENSG00000267575	lncRNA	chr19:28288860-28288920_+	1.67132750950959	0.0297598	1.75801869456267	0.0414589
A_19_P00322096	ENSG00000204091	lncRNA	chr6:40347349-40347409_+	1.38689236102977	0.1401	1.28919098527321	0.209
A_19_P00322190	ENSG00000205763	pseudogene	chr7:32982541-32982601_-	1.24561047229556	0.3219	1.09153949246154	0.532
A_19_P00322220	ENSG00000196756	protein_coding	chr20:37055062-37055122_-	0.967241730985835	0.797525	1.05949385709512	0.512603
A_19_P00322224	lnc-ARFGAP1-1	lncRNA	chr20:61892907-61892967_+	0.836436438547859	0.2785	0.780653568827534	0.249501
A_19_P00322225	ENSG00000235899	lncRNA	chr6:53495927-53495987_+	0.942024255241636	0.850968	1.46164013525461	0.0621
A_19_P00322299	ENSG00000130449	protein_coding	chr5:60768739-60768799_+	1.67903522449162	0.0213	1.75247273877664	0.0136
A_19_P00322336	ENSG00000225470	lncRNA	chrX:73164185-73164245_+	0.671836913186759	0.0576	0.663085706380052	0.0631
A_19_P00322357	ENSG00000262188	lncRNA	chr17:77896629-77896689_+	1.32003770278628	0.1885	1.16414036791608	0.550067
A_19_P00322371	ENSG00000204054	lncRNA	chr9:132266125-132266185_+	1.22071122979575	0.618554	0.972864994126699	0.807755
A_19_P00322413	lnc-DYM-1	Poorly Annotated	chr18:46544467-46544527_-	1.37643084909048	0.1407	1.18597650728813	0.291
A_19_P00322416	ENSG00000240024	pseudogene	chr3:183165556-183165616_+	1.02030414637879	0.860085	1.37756542520364	0.125
A_19_P00322432	ENSG00000255767	protein_coding	chr2:3579629-3579689_-	1.6376134229196	0.0361	0.998789445314964	0.970713
A_19_P00322442	ENSG00000233901	lncRNA	chr9:132104104-132104164_+	1.82606203776548	0.00865002	1.1174183693291	0.313212
A_19_P00322487	ENSG00000223546	lncRNA	chrX:102080929-102080989_+	1.28686793745615	0.2357	0.979184600822236	0.724184
A_19_P00322530	ENSG00000197077	protein_coding	chr22:25424302-25424362_+	1.08952207721069	0.5781	0.951392642789989	0.641959
A_19_P00322569	ENSG00000228526	lncRNA	chr1:9242064-9242124_-	1.20320685079012	0.3215	1.06750122888002	0.721392
A_19_P00322583	ENSG00000254363	protein_coding	chr5:139547327-139547387_+	1.06950375787101	0.601497	1.00321138911018	0.949695
A_19_P00322621	ENSG00000233901	lncRNA	chr9:132104034-132104094_+	2.20661413871363	0.0009	1.6431817621641	0.0333
A_19_P00322666	ENSG00000203875	protein_coding	chr6:86386822-86386882_-	0.534743237823849	0.0285463	0.596755804311798	0.0272
A_19_P00322687	ENSG00000226887	protein_coding	chr4:53617729-53617789_-	0.87256359718406	0.3384	0.800048775070694	0.2307
A_19_P00322702	ENSG00000203875	protein_coding	chr6:86386844-86386904_-	0.503571538710263	0.010064	0.530830558887741	0.0142
A_19_P00322711	ENSG00000261824	lncRNA	chr19:28283916-28283976_-	1.06183430376459	0.680298	1.55676793117069	0.0393807
A_19_P00322754	ENSG00000203875	protein_coding	chr6:86387141-86387201_-	0.511888752030361	0.01	0.508909271095046	0.0081
A_19_P00322793	ENSG00000204054	lncRNA	chr9:132266016-132266076_+	1.33439206233074	0.222799	0.929349962019471	0.5453
A_19_P00322797	ENSG00000129657	protein_coding	chr17:75085273-75085333_+	1.18918013385303	0.4061	1.15698754390883	0.4179
A_19_P00322813	ENSG00000164989	pseudogene	chr9:16060942-16061002_+	1.64226292015545	0.0193	1.76965798450401	0.0161
A_19_P00322828	ENSG00000225783	lncRNA	chr22:27064138-27064198_+	1.54705575077067	0.0398	2.00536019369057	0.0029
A_19_P00322839	ENSG00000233901	lncRNA	chr9:132104080-132104140_+	1.9424300875708	0.00896382	1.45236524385986	0.0332
A_19_P00322856	ENSG00000237765	protein_coding	chr4:15688025-15688085_+	1.54032538922453	0.0488	1.56000597313021	0.0442
A_19_P00322896	ENSG00000212766	lncRNA	chr15:69373296-69373356_+	1.167680940091	0.4023	0.79220981506405	0.2976
A_19_P00322900	ENSG00000225783	lncRNA	chr22:27072278-27072338_+	3.93385235176419	0.00395901	4.17607919361949	0.000521294
A_19_P00322904	ENSG00000181982	protein_coding	chr4:24809969-24810029_-	1.16295851435966	0.566245	1.23298038146828	0.219476
A_19_P00322906	ENSG00000212719	protein_coding	chr17:21434241-21434301_-	1.6235403132612	0.0359	1.27525924169395	0.1904
A_19_P00322925	ENSG00000250903	lncRNA	chr6:2481188-2481248_+	1.11425375495607	0.334097	1.21450484909135	0.2417
A_19_P00322932	ENSG00000204054	lncRNA	chr9:132251371-132251431_+	1.06760459595337	0.990538	1.282245699036	0.1759
A_19_P00322933	ENSG00000204054	lncRNA	chr9:132251518-132251578_+	0.965092727350802	0.540491	0.982060148042985	0.933111
A_19_P00322938	ENSG00000006625	protein_coding	chr7:30590311-30590371_-	0.991365409004552	0.895781	1.02822744779855	0.824687
A_19_P00322939	ENSG00000249859	lncRNA	chr8:129082458-129082518_+	1.62955263862873	0.0217	1.51930826364919	0.0629
A_19_P00322944	ENSG00000203875	protein_coding	chr6:86387512-86387572_-	0.464463315422107	0.0109119	0.585584253975343	0.0181
A_19_P00322948	ENSG00000245910	protein_coding	chr8:67834848-67834908_-	0.406974804299064	0.002	0.621180534104136	0.044121
A_19_P00322953	ENSG00000229536	lncRNA	chr2:130626825-130626885_-	0.982560521151498	0.47069	1.31138685512627	0.211549
A_19_P00322967	ENSG00000196756	protein_coding	chr20:37055061-37055121_-	0.987079566950744	0.929087	0.807040019904229	0.3561
A_19_P00322968	ENSG00000204054	lncRNA	chr9:132265859-132265919_+	1.25018199624	0.446396	0.932069247109149	0.5423
A_19_P00322977	ENSG00000231721	lncRNA	chr7:130737243-130737303_-	1.13466709255399	0.412434	0.732520670571012	0.1565
A_19_P00323041	ENSG00000225470	lncRNA	chrX:73167113-73167173_+	0.843397418759428	0.3393	0.752612675815414	0.1643
A_19_P00323082	ENSG00000130600	protein_coding	chr11:2016960-2017020_-	1.26729343401602	0.2531	1.10169381596774	0.447462
A_19_P00323454	ENSG00000214401	lncRNA	chr17:44273813-44273873_+	0.759577793349198	0.514993	0.707301156527508	0.498585
A_19_P00324286	ENSG00000073803	protein_coding	chr3:185010591-185010651_+	0.492474013757738	0.00458726	0.810719436831385	0.773249
A_19_P00324399	ENSG00000257815	lncRNA	chr12:70636292-70636352_-	1.15085730040368	0.4623	1.04525608996727	0.869102
A_19_P00324814	ENSG00000230590	Poorly Annotated	chrX:73231904-73231964_+	0.977766223441862	0.541702	1.04979213579204	0.738544
A_19_P00324839	ENSG00000251562	lncRNA	chr11:65273510-65273570_+	0.913769292857047	0.6119	0.69647297562056	0.0925
A_19_P00325015	ENSG00000253352	lncRNA	chr22:31374599-31374659_+	1.13833524369074	0.4675	0.650804541452836	0.0673
A_19_P00325158	ENSG00000251562	lncRNA	chr11:65273713-65273773_+	1.28868407852849	0.318284	0.369874438119991	0.0002
A_19_P00325604	ENSG00000258609	lncRNA	chr18:54722349-54722409_-	1.15572794967258	0.435507	2.25050195666284	0.0100141
A_19_P00325768	ENSG00000136003	protein_coding	chr12:108962858-108962919_+	0.746412896140282	0.1561	0.758595786309298	0.1094
A_19_P00325810	ENSG00000135314	pseudogene	chr6:73984676-73984736_-	1.67979763146605	0.0135	2.14537469053404	0.002
A_19_P00325912	ENSG00000231074	lncRNA	chr6:30256503-30256563_-	1.35991673480711	0.281561	0.97545729825177	0.740877
A_19_P00326178	ENSG00000138035	protein_coding	chr2:55861229-55861289_-	0.315265609072395	8.83766e-05	0.691448670432745	0.174039
A_19_P00326514	ENSG00000269976	lncRNA	chr2:20786026-20786086_-	3.73414141975657	0.000909382	2.27088816978668	0.0105488
A_19_P00326732	ENSG00000224531	protein_coding	chr6:11138725-11138785_+	0.965143127385638	0.633608	1.71744615325307	0.0269
A_19_P00326822	ENSG00000170035	pseudogene	chr2:181940988-181941048_+	1.52739158787573	0.0645712	1.21876634488288	0.1849
A_19_P00327035	ENSG00000225978	lncRNA	chr20:61735143-61735203_+	1.88604816537996	0.0048	1.07782010850965	0.57341
A_19_P00327354	ENSG00000204054	lncRNA	chr9:132267303-132267363_+	1.20066136684863	0.587746	1.28342337985771	0.1725
A_19_P00328190	ENSG00000263327	lncRNA	chr4:16259106-16259166_+	1.35709577948569	0.1397	1.01678476451138	0.954811
A_19_P00329086	lnc-MOXD1-1	lncRNA	chr6:132453156-132453216_-	1.00385561986052	0.952782	1.24397575581047	0.2818
A_19_P00329711	lnc-MAVS-1	lncRNA	chr20:3855718-3855778_+	1.23798920512814	0.2994	1.09498468012576	0.5057
A_19_P00329806	ENSG00000228630	lncRNA	chr12:54356095-54356155_-	1.44842536775677	0.0739	0.897006694653655	0.5362
A_19_P00331618	lnc-LTBP3-2	lncRNA	chr11:65266816-65266876_-	1.00406188862279	0.824379	0.71152231903341	0.1244
A_19_P00800006	ENSG00000122406	protein_coding	chr1:93301780-93301840_+	0.293300063599932	0.000863913	0.365856673077292	0.00429971
A_19_P00800244	lnc-CLEC2D-6	lncRNA	chr12:9498840-9498900_+	1.32501708241419	0.1857	1.35111982924617	0.1166
A_19_P00800264	ENSG00000253738	lncRNA	chr8:92075766-92075826_-	0.954214992171169	0.564492	1.45851768767858	0.0624393
A_19_P00800549	ENSG00000160783	protein_coding	chr1:156209771-156209831_+	1.07994892823541	0.876508	0.855799025718036	0.3579
A_19_P00800555	lnc-UQCRFS1-7	lncRNA	chr19:28263849-28264330_-\chr19:28263296-28263356_-	1.10763788366906	0.560656	1.3607523986097	0.233861
A_19_P00800638	ENSG00000249307	lncRNA	chr4:80229578-80229638_+	1.17802745985211	0.362	0.869746223687398	0.5049
A_19_P00801041	ENSG00000235590	Poorly Annotated	chr20:57402286-57402346_-	1.87392457297856	0.0071	1.72087160975006	0.0199
A_19_P00801576	ENSG00000149187	protein_coding	chr11:47487683-47487743_-	1.07929402478015	0.5681	1.10250013886391	0.44843
A_19_P00801585	lnc-UQCRFS1-7	lncRNA	chr19:28263097-28263157_-	1.00581371022436	0.432901	1.43128416521175	0.3261
A_19_P00801627	ENSG00000140350	protein_coding	chr15:69072340-69072405_-	0.97224752373196	0.974836	0.904607424981184	0.370252
A_19_P00801634	ENSG00000257956	pseudogene	chr12:79952572-79952632_+	0.56822650704213	0.023	0.603103118219091	0.0578
A_19_P00801649	ENSG00000228705	lncRNA	chr20:61405560-61405620_-	2.10059417752949	0.0024	1.42345981840906	0.0903
A_19_P00801735	ENSG00000228878	lncRNA	chr7:35792272-35792332_-	0.975076117836837	0.778401	1.28567364134367	0.1477
A_19_P00801821	ENSG00000101361	protein_coding	chr20:2638583-2638642_+	0.691559330018218	0.1534	0.661652222325941	0.0829
A_19_P00801917	lnc-FARS2-2	lncRNA	chr6:5986230-5986290_+	0.692685533362183	0.1091	0.607769596396855	0.0357
A_19_P00801960	ENSG00000235142	protein_coding	chr6:107187626-107187686_-	1.38380257974703	0.1091	1.20385736493559	0.2854
A_19_P00802141	ENSG00000205339	protein_coding	chr11:9467557-9467618_+	0.965536616280834	0.710857	0.970536847921445	0.759203
A_19_P00802201	ENSG00000157456	protein_coding	chr15:59416994-59417053_+	1.38321143865893	0.1207	1.27135443836035	0.2078
A_19_P00802257	ENSG00000233621	lncRNA	chr1:37920548-37920608_-	1.81287166738965	0.0234845	1.58322131569759	0.0333
A_19_P00802413	ENSG00000103335	protein_coding	chr16:88815791-88815851_-	0.643837575119549	0.0961	0.51404770285016	0.0092
A_19_P00802546	ENSG00000123575	protein_coding	chrX:103440454-103440514_+	1.11664953443381	0.497274	1.23167913142194	0.499979
A_19_P00802550	lnc-C12orf75-1	lncRNA	chr12:105805166-105805226_+	1.488539206534	0.061	1.40098202649488	0.0768
A_19_P00802614	ENSG00000037749	pseudogene	chr5:153476747-153476807_+	1.47372638058106	0.098	1.20094149195654	0.3097
A_19_P00802654	ENSG00000186432	protein_coding	chr3:160213075-160213135_-	1.15884449933655	0.4102	1.02576111305373	0.710855
A_19_P00802759	ENSG00000272325	protein_coding	chr6:34248175-34248235_-	0.72423457679352	0.1294	0.706831841154616	0.148
A_19_P00802936	ENSG00000254999	protein_coding	chr3:10168524-10168584_+	0.768955588169333	0.1961	0.726087698416478	0.2269
A_19_P00803086	ENSG00000176809	protein_coding	chr17:62850121-62850181_+	1.51355623595918	0.0175	1.37968579712671	0.267007
A_19_P00803226	ENSG00000253716	lncRNA	chr8:144362985-144363045_-	0.644895002949309	0.053	0.940359207463607	0.540186
A_19_P00803333	ENSG00000130449	protein_coding	chr5:60790177-60790237_+	1.77427816905486	0.0106	1.65863976553183	0.0226
A_19_P00803351	lnc-FBRSL1-4	lncRNA	chr12:132857350-132857410_+	1.19940554233952	0.3721	1.17844365237379	0.378
A_19_P00803360	ENSG00000216775	protein_coding	chr6:52531317-52531377_+	0.804191221002212	0.3686	1.30857973077892	0.1839
A_19_P00803472	lnc-GDF10-2	lncRNA	chr10:48512248-48512308_-	1.27326632984342	0.2598	0.93508038668494	0.621
A_19_P00803685	ENSG00000272016	lncRNA	chr5:10657670-10657730_+	0.972976623776414	0.739174	1.62601296057618	0.0225386
A_19_P00804212	ENSG00000169599	protein_coding	chr2:69627496-69627557_-	0.823463714329172	0.2847	1.20007504206039	0.421598
A_19_P00804755	ENSG00000169519	protein_coding	chr11:28352113-28352173_+	1.50754364030444	0.0646	1.20920969366514	0.3097
A_19_P00804767	ENSG00000107779	protein_coding	chr10:88684156-88684216_+	1.28822749362668	0.1618	1.12225950715688	0.881477
A_19_P00804777	ENSG00000261824	lncRNA	chr19:28268217-28268277_-	1.21874294831378	0.754115	1.58897098092855	0.0391
A_19_P00804817	ENSG00000141646	protein_coding	chr18:48611329-48611389_+	2.47494167834425	0.00144925	1.46293599943892	0.0783
A_19_P00805006	ENSG00000251562	lncRNA	chr11:65273870-65273930_+	1.21407700385523	0.497914	0.371418369378976	0.0002
A_19_P00805047	ENSG00000132780	protein_coding	chr1:46083826-46083886_+	0.851480737363003	0.3593	1.0351063321064	0.798026
A_19_P00805212	ENSG00000135314	pseudogene	chr6:73984541-73984601_-	1.10186332612463	0.5642	0.860977272788318	0.364
A_19_P00805272	ENSG00000197077	protein_coding	chr22:25593278-25593338_+	0.643661491070677	0.188489	0.843680088806664	0.495123
A_19_P00805273	ENSG00000227738	pseudogene	chr2:124519808-124519868_+	0.921018063603561	0.5244	1.08426904027745	0.458231
A_19_P00805291	ENSG00000220744	pseudogene	chr10:13100195-13100252_-\chr4:98946960-98947017_+\chr15:25154484-25154544_-\chr6:127684082-127684142_+	0.47915202469797	0.0115	0.51585385339195	0.0154198
A_19_P00805367	lnc-BCKDHB-1	lncRNA	chr6:81152391-81152451_+	1.20798977352199	0.2561	1.07485386029484	0.5602
A_19_P00805625	ENSG00000204054	lncRNA	chr9:132266279-132266339_+	1.29581317369595	0.462922	0.984617332601815	0.778122
A_19_P00805651	ENSG00000248049	Poorly Annotated	chr4:68578527-68578587_-	1.24712268269963	0.2566	1.07605545758227	0.5359
A_19_P00805679	ENSG00000242193	pseudogene	chr1:177976517-177976577_-	1.44714692514479	0.0711	1.32335034727826	0.1895
A_19_P00805702	ENSG00000106392	protein_coding	chr7:7288140-7288200_+	1.16717591580957	0.458423	1.51183318166338	0.358004
A_19_P00805705	ENSG00000173064	protein_coding	chr12:112757095-112757155_-	1.21242911183935	0.488191	1.13356142401135	0.4106
A_19_P00805833	ENSG00000166669	protein_coding	chr16:10481422-10481482_+	0.715452032164721	0.1871	0.609326952454734	0.0606
A_19_P00805840	ENSG00000234420	pseudogene	chr10:43012653-43012713_-	1.26947634297363	0.2281	1.18955320595903	0.631372
A_19_P00805942	ENSG00000013293	protein_coding	chr3:170181216-170181276_-	0.963378509639427	0.627351	1.05720519829159	0.552036
A_19_P00805950	ENSG00000203739	lncRNA	chr1:173386996-173387056_-	1.45594262423861	0.0785	1.15354378959635	0.4089
A_19_P00806098	ENSG00000267279	lncRNA	chr18:59273486-59273546_-	1.35884462251801	0.1255	1.48613752252256	0.0428
A_19_P00806158	ENSG00000108468	protein_coding	chr17:46147655-46147718_-	0.600973852804408	0.0243	0.570984999118681	0.0211
A_19_P00806320	ENSG00000163466	protein_coding	chr2:219118849-219118909_+	1.08131427941598	0.607	1.14268957211447	0.415
A_19_P00806637	lnc-KLF7-1	lncRNA	chr2:208102924-208102984_-	2.71964897716032	0.000820365	2.71796610631458	0.00229523
A_19_P00806771	ENSG00000228705	lncRNA	chr20:61405494-61405554_-	2.85561831733365	0.00048415	2.01022932454094	0.0084
A_19_P00806882	ENSG00000232015	pseudogene	chr1:78319499-78319540_+	0.656768773236032	0.0933	0.641837050892923	0.0451
A_19_P00806911	ENSG00000272325	protein_coding	chr6:34248114-34248174_-	0.756787934186742	0.1448	0.686894551653978	0.1042
A_19_P00806947	ENSG00000132646	protein_coding	chr20:5095810-5095870_-	0.582957536068183	0.0343	0.81397761935648	0.2629
A_19_P00807057	ENSG00000253352	lncRNA	chr22:31374263-31374323_+	1.18824017831803	0.4315	0.607952695084495	0.0275
A_19_P00807336	ENSG00000213383	pseudogene	chr3:17913524-17913584_-	0.549338340814392	0.0127	0.744780591744106	0.0876
A_19_P00807384	ENSG00000267575	lncRNA	chr19:28288873-28288933_+	1.73135077779856	0.0113506	1.91954526018279	0.0078
A_19_P00807628	ENSG00000225177	lncRNA	chr6:139018069-139018129_+	1.05317695957874	0.705046	0.755932050093399	0.2258
A_19_P00808072	lnc-RTL1-2	lncRNA	chr14:101538454-101538514_-	0.970207464199461	0.900902	1.63456236925592	0.0255
A_19_P00808208	ENSG00000164649	protein_coding	chr7:21941494-21941554_-	0.972845633828136	0.740658	0.894953059299582	0.385977
A_19_P00808348	ENSG00000267575	lncRNA	chr19:28289103-28289163_+	1.28867890523337	0.1482	1.77689863038775	0.0144
A_19_P00808453	ENSG00000178741	protein_coding	chr15:75212647-75212707_-	0.687033193623191	0.1831	1.52829104549006	0.0720634
A_19_P00808461	ENSG00000075407	protein_coding	chr10:38407493-38407553_+	0.677433911147419	0.1478	0.737803926766525	0.1791
A_19_P00808668	ENSG00000164091	protein_coding	chr3:52288525-52288586_-	0.679193895037693	0.0923	0.702552901693225	0.1408
A_19_P00808758	lnc-SLITRK5-12	Poorly Annotated	chr13:85103150-85103210_+	0.918955804485956	0.6002	0.762389446830533	0.3027
A_19_P00809076	ENSG00000214401	lncRNA	chr17:44273753-44273813_+	0.717748740463802	0.285993	0.730507621856248	0.418175
A_19_P00809119	ENSG00000272168	lncRNA	chr6:22110998-22111058_+	2.16278520280379	0.0011	1.37309170783365	0.1302
A_19_P00809139	ENSG00000251136	lncRNA	chr8:90624034-90624094_-	0.571510225273749	0.115625	0.792151757159875	0.176795
A_19_P00809417	ENSG00000166669	protein_coding	chr16:10481361-10481421_+	0.939955209353095	0.793967	0.715326332839883	0.186
A_19_P00809440	lnc-RP11-259P6.1.1-2	lncRNA	chr11:133766638-133766698_-	1.02993537509211	0.953995	0.943431792430676	0.424776
A_19_P00809558	ENSG00000138385	protein_coding	chr2:170668326-170668386_+	0.414499288498007	0.0011	0.617061150593383	0.0295
A_19_P00809614	ENSG00000251562	lncRNA	chr11:65273810-65273870_+	1.25515933928655	0.448979	0.363813352641454	0.0002
A_19_P00809902	lnc-LMBR1-2	lncRNA	chr7:156264814-156264874_-	1.27975165399605	0.2287	1.09889364727632	0.5159
A_19_P00810043	lnc-RPL7L1-1	lncRNA	chr6:42752953-42753013_+	0.79606717492641	0.2439	0.936562223376981	0.714886
A_19_P00810045	ENSG00000108788	protein_coding	chr17:40721609-40722044_+	0.932867819959731	0.4689	1.26193883901669	0.21
A_19_P00810205	ENSG00000157456	protein_coding	chr15:59409489-59409549_+	1.13251515715273	0.393815	1.07940562607216	0.606512
A_19_P00810361	ENSG00000154719	protein_coding	chr21:26965182-26965242_-	0.688548905117838	0.1263	0.864467881827122	0.457
A_19_P00810465	ENSG00000130035	protein_coding	chr12:4960115-4960175_+	0.924452108424627	0.676149	1.0355818548842	0.896222
A_19_P00810474	ENSG00000079432	protein_coding	chr19:42778346-42778406_+	1.56257667847424	0.0346	1.20952190040029	0.2562
A_19_P00810523	ENSG00000164182	protein_coding	chr5:60448586-60448646_+	0.829411314678927	0.4274	0.983620146709309	0.822676
A_19_P00810748	ENSG00000188185	lncRNA	chr7:39773279-39773339_+	2.05001691894297	0.00478322	1.15108311085177	0.3645
A_19_P00810806	ENSG00000227258	lncRNA	chr13:44722083-44722143_+	1.79459277207911	0.0159	1.1461232195534	0.3291
A_19_P00810899	ENSG00000234912	lncRNA	chr17:75090935-75090995_+	0.667588269358579	0.0709	0.62824695602099	0.0853833
A_19_P00810982	lnc-MACROD1-1	lncRNA	chr11:63946264-63946324_-	0.942816735349723	0.845192	0.681091081186895	0.1106
A_19_P00811196	ENSG00000214293	lncRNA	chr7:77313278-77313338_-	0.754152462613008	0.1242	0.544005253960669	0.0119
A_19_P00811264	lnc-TSHZ1-1	lncRNA	chr18:72882440-72882500_+	1.40828431700372	0.1211	1.01927693832098	0.855208
A_19_P00811284	ENSG00000132780	protein_coding	chr1:46083948-46084008_+	1.16510683131476	0.4146	0.997915711588827	0.606906
A_19_P00811288	ENSG00000237748	pseudogene	chrX:56763803-56763863_-	0.758106871695446	0.2404	1.30436012258207	0.2172
A_19_P00811561	ENSG00000253352	lncRNA	chr22:31374203-31374263_+	1.20185367989267	0.3201	0.720557244955736	0.1273
A_19_P00811843	ENSG00000134909	protein_coding	chr11:128933818-128933878_-	1.45819734450499	0.0611	1.17043678009924	0.518655
A_19_P00811939	ENSG00000073803	protein_coding	chr3:185010422-185010482_+	0.569999708783953	0.00881268	0.744443300146987	0.384305
A_19_P00811954	ENSG00000197182	protein_coding	chr22:46509618-46509678_+	1.04167562296856	0.961994	0.951895941471932	0.756827
A_19_P00812033	ENSG00000224012	pseudogene	chr5:163136378-163136438_-	0.811060528010429	0.2154	1.04725138380767	0.716209
A_19_P00812044	lnc-MAVS-1	lncRNA	chr20:3855594-3855654_+	1.3386669798952	0.1628	1.05360241755041	0.5238
A_19_P00812215	ENSG00000250669	pseudogene	chr5:66986051-66986111_-	0.378365989949421	0.0003	0.795406668481142	0.170065
A_19_P00812250	ENSG00000141646	protein_coding	chr18:48611269-48611329_+	1.32419947965923	0.1775	1.05706221597097	0.697835
A_19_P00812340	ENSG00000087086	protein_coding	chr19:49469859-49469919_+	0.786010683285923	0.2763	0.670757632665984	0.1055
A_19_P00812502	ENSG00000214870	lncRNA	chr7:26533708-26533768_+	1.71426630180704	0.0261	1.34684613390898	0.1457
A_19_P00812553	ENSG00000180817	protein_coding	chr10:71962877-71962936_-	0.733912586318484	0.2022	0.751902167734606	0.1989
A_19_P00812608	ENSG00000250903	lncRNA	chr6:2481333-2481393_+	0.85232062428531	0.4151	0.98688674210029	0.827717
A_19_P00812911	ENSG00000233621	lncRNA	chr1:37920488-37920548_-	1.26531713852324	0.2551	1.44151807619487	0.0879
A_19_P00813347	ENSG00000186432	protein_coding	chr3:160213015-160213075_-	1.27512246882262	0.1715	1.29844632976839	0.1842
A_21_P0000004	ENSG00000204070	protein_coding	chr20:44005341-44005401_+	0.908840006602471	0.4823	0.703585323613007	0.136909
A_21_P0000006	ENSG00000130204	protein_coding	chr19:45406843-45406903_+	0.850944746602042	0.345	0.969240202912408	0.73084
A_21_P0000011	ENSG00000162066	protein_coding	chr16:2580662-2580722_+	1.07597942199443	0.817112	0.88153285014456	0.484289
A_21_P0000013	ENSG00000126953	pseudogene	chrX:100603025-100603080_-	0.874599284654189	0.5381	0.796325142943506	0.2718
A_21_P0000020	ENSG00000122965	protein_coding	chr12:114254579-114254639_-	1.14644232616664	0.3759	0.782029581723124	0.2459
A_21_P0000026	ENSG00000169609	protein_coding	chr15:83677301-83677361_-	0.873814823229079	0.4024	1.06322005438944	0.618069
A_21_P0000027	ENSG00000149743	protein_coding	chr11:63991364-63991424_-	0.920020069117148	0.569	0.663251925169704	0.0727
A_21_P0000033	ENSG00000230062	protein_coding	chr6:46726895-46726955_+	1.28092396765206	0.2339	1.10457433891421	0.486
A_21_P0000034	ENSG00000166260	protein_coding	chr17:53038566-53038625_-	0.48185721896459	0.00906116	1.09625525289137	0.774857
A_21_P0000040	ENSG00000112365	protein_coding	chr6:109802220-109802280_-	0.688169876547185	0.1022	0.803331090747276	0.280793
A_21_P0000044	ENSG00000105889	protein_coding	chr7:89791336-89791393_+\chr7:22532182-22532239_-	1.14142795919565	0.4944	0.959610130929571	0.523958
A_21_P0000053	ENSG00000185716	protein_coding	chr16:22095742-22095802_+	0.487109467304637	0.0053	1.20502593528986	0.587178
A_21_P0000054	ENSG00000232838	protein_coding	chr20:18123598-18123658_+	0.430159600446656	0.0349305	0.790894500261739	0.2157
A_21_P0000055	ENSG00000214113	protein_coding	chr6:5186836-5186896_-	0.967332469091298	0.645462	1.10315751278014	0.4295
A_21_P0000056	ENSG00000166471	protein_coding	chr11:9316825-9316885_-	1.33823727008493	0.338113	1.45012436768459	0.0866
A_21_P0000061	ENSG00000138028	protein_coding	chr2:27322411-27322471_-	1.35547024162268	0.1175	1.06114824083768	0.620319
A_21_P0000063	ENSG00000135272	protein_coding	chr7:114563629-114563689_+	0.693072661147991	0.251556	0.742151259014334	0.1164
A_21_P0000068	ENSG00000225828	protein_coding	chr1:32826896-32826956_-	1.52765652634269	0.0563	1.39351466632799	0.0777
A_21_P0000069	ENSG00000197415	protein_coding	chr3:157177560-157177620_-	1.35309879298404	0.284324	2.30464808051123	0.00578866
A_21_P0000073	ENSG00000145623	protein_coding	chr5:38886588-38886648_+	1.94664381508363	0.0096	2.82344781916912	0.0002
A_21_P0000075	ENSG00000270610	pseudogene	chr14:70701813-70701873_+	1.01601795631428	0.900069	0.608135306420788	0.0512
A_21_P0000079	ENSG00000196233	protein_coding	chr10:98724117-98724177_+	1.14582745617421	0.4482	0.992477980850025	0.739193
A_21_P0000081	ENSG00000104231	protein_coding	chr8:82615193-82615253_-	0.575151023630818	0.0239	0.888983796337789	0.4104
A_21_P0000083	ENSG00000114859	protein_coding	chr3:184064048-184064108_-	0.964919824240597	0.924411	1.2239731546376	0.362551
A_21_P0000092	ENSG00000058673	protein_coding	chr1:203769530-203769590_+	1.89211058308023	0.0041	1.82320685728793	0.012
A_21_P0000096	ENSG00000088882	protein_coding	chr20:2774714-2774769_-	0.934732214798671	0.659524	0.920884842465206	0.719954
A_21_P0000099	ENSG00000181885	protein_coding	chr17:7163268-7163328_-	1.33377571532446	0.1771	1.13808938288105	0.3948
A_21_P0000100	ENSG00000256618	protein_coding	chr17:22023931-22023991_+	0.703194012714477	0.0569491	0.71656654444557	0.1807
A_21_P0000103	ENSG00000256222	protein_coding	chr20:55933495-55933555_-	1.17378393705524	0.417185	1.63348726036258	0.0299
A_21_P0000106	ENSG00000270188	protein_coding	chr1:238107183-238107229_-\chr7:142375464-142375524_+	0.701511307697937	0.0685	0.835209790950136	0.4413
A_21_P0000107	ENSG00000225276	pseudogene	chr10:37890365-37890425_-\chrX:55207822-55207882_-\chr7:141504832-141504892_-	1.12199598336684	0.452657	1.49703107704351	0.0722
A_21_P0000108	ENSG00000255823	protein_coding	chr11:10529493-10529553_-	0.609642788682217	0.0636	1.59428229437381	0.066
A_21_P0000109	ENSG00000255633	protein_coding	chr6:62284470-62284530_+	0.889504398308459	0.3272	1.56660058541986	0.0559
A_21_P0000110	ENSG00000256045	protein_coding	chr10:37890366-37890424_-\chrX:55207823-55207883_-	1.203314151289	0.2949	1.54856367636594	0.0437
A_21_P0000112	ENSG00000213967	protein_coding	chr19:24102818-24102878_+	1.62267487893702	0.0435946	1.36454855355261	0.1415
A_21_P0000115	ENSG00000257727	protein_coding	chr12:56708298-56708358_-	0.785244545041344	0.279	0.814162359694976	0.3857
A_21_P0000119	ENSG00000175600	protein_coding	chr7:40900229-40900289_+	1.53211810254936	0.0461	1.56660757318672	0.0474
A_21_P0000121	ENSG00000235034	protein_coding	chr19:51162507-51162567_+	0.891611951690837	0.401681	1.15465171507944	0.291823
A_21_P0000126	ENSG00000260001	protein_coding	chr19:7983817-7983877_+	1.60078385101148	0.0271	1.08522616357815	0.5525
A_21_P0000130	ENSG00000244219	lncRNA	chr7:99208396-99208456_+	0.954419509708313	0.849714	0.785841606074326	0.665971
A_21_P0000131	ENSG00000171735	protein_coding	chr1:6931983-6932043_+	0.700684135430093	0.114	0.92347472704184	0.5652
A_21_P0000135	ENSG00000131503	protein_coding	chr5:139851986-139852046_+	1.01933856191613	0.839677	0.985260508133489	0.942608
A_21_P0000139	ENSG00000104901	protein_coding	chr19:49878311-49878371_+	1.42929692357639	0.0971	1.01190395021355	0.893252
A_21_P0000148	ENSG00000165264	protein_coding	chr9:32553908-32558933_-	0.768614785243527	0.208	0.94998148726563	0.624447
A_21_P0000149	ENSG00000005436	protein_coding	chr2:75929075-75929135_-	1.72103682602585	0.0206	1.43848579834374	0.1028
A_21_P0000150	ENSG00000141428	protein_coding	chr18:33559067-33559127_+	0.921058379751623	0.63	1.84810690590088	0.0154
A_21_P0000152	ENSG00000026508	protein_coding	chr11:35244790-35244850_+	1.31512380517682	0.210441	1.78299722669798	0.0092
A_21_P0000153	ENSG00000113580	Poorly Annotated	chr5:142673450-142673510_-	1.25906872444926	0.1288	1.74431179261423	0.0131
A_21_P0000155	ENSG00000161057	protein_coding	chr7:103002810-103002870_+	1.16567895126056	0.784397	1.28986811526022	0.2085
A_21_P0000157	ENSG00000269343	protein_coding	chr19:58357509-58357569_+	1.3390746818932	0.1373	1.0670110858419	0.706824
A_21_P0000158	ENSG00000196236	pseudogene	chr22:41258711-41258771_+	0.671698479991324	0.063	1.45064266376707	0.234564
A_21_P0000163	ENSG00000237330	protein_coding	chr1:1007713-1007773_-	1.85287621118509	0.0054	1.01312987854024	0.876643
A_21_P0000168	ENSG00000170653	protein_coding	chr12:53936713-53936773_-	1.19434721393711	0.389616	1.68905904238967	0.0181
A_21_P0000172	ENSG00000114646	protein_coding	chr3:47603805-47603865_-	2.61634305348567	0.0426923	1.28208446611377	0.613099
A_21_P0000173	ENSG00000197536	protein_coding	chr5:131811623-131811683_+	0.756976784649211	0.1072	0.832590469141174	0.372395
A_21_P0000175	ENSG00000126457	protein_coding	chr19:50191629-50191689_+	0.597357756939846	0.0387	0.555538930657934	0.016
A_21_P0000177	ENSG00000267757	protein_coding	chr19:46145873-46145933_+	1.39286699653223	0.1019	1.13474748952794	0.4399
A_21_P0000179	ENSG00000105677	protein_coding	chr19:36038375-36038429_+	0.7355635209564	0.1926	0.864760031953834	0.3329
A_21_P0000181	ENSG00000171735	pseudogene	chr1:6947928-6947988_+	0.861418730799977	0.4546	0.860065879100645	0.366
A_21_P0000189	ENSG00000117505	protein_coding	chr1:93827864-93827924_+	0.86464420433385	0.208468	1.23238981786518	0.2358
A_21_P0000192	ENSG00000177426	protein_coding	chr18:3458274-3458334_+	1.12551845409796	0.5548	0.742099976100794	0.2267
A_21_P0000193	ENSG00000183431	protein_coding	chr1:38422654-38422714_-	1.00253276032389	0.986272	0.884971421484705	0.442904
A_21_P0000195	ENSG00000108021	protein_coding	chr10:5805604-5805664_+	0.634880250191798	0.063	0.745438599065646	0.1485
A_21_P0000197	ENSG00000196787	protein_coding	chr6:27101246-27101306_+	0.953068397641794	0.626574	1.48118273003635	0.137742
A_21_P0000200	ENSG00000147316	protein_coding	chr8:6501077-6501137_+	0.458195412743082	0.0135287	1.34528493872387	0.234434
A_21_P0000201	ENSG00000175582	protein_coding	chr11:73387028-73387088_-\chr2:130740163-130740223_+	0.946212705817659	0.5882	1.39625049140233	0.0987
A_21_P0000202	ENSG00000161013	protein_coding	chr5:179224599-179224659_-	0.977968070992219	0.917821	1.17891504307201	0.2484
A_21_P0000203	ENSG00000136811	protein_coding	chr9:131257056-131257116_+	0.524631130139546	0.00670125	0.746620829642269	0.1729
A_21_P0000205	ENSG00000163009	protein_coding	chr2:10350728-10350788_+	1.36780252845525	0.1409	1.14056269004519	0.3413
A_21_P0000206	ENSG00000122406	protein_coding	chr1:93302880-93302940_+	0.903213582990203	0.4202	1.3293865971155	0.14354
A_21_P0000207	ENSG00000145425	protein_coding	chr4:152024983-152025043_+	0.96277319627453	0.64211	0.77264207181803	0.2205
A_21_P0000208	ENSG00000255717	protein_coding	chr11:62620439-62620499_-	0.83484781632788	0.3711	0.743671441463292	0.1379
A_21_P0000210	ENSG00000238578	lncRNA	chr17:27049610-27049670_+	0.769403636127113	0.261	0.586805396825756	0.0105123
A_21_P0000212	ENSG00000105640	protein_coding	chr19:17973420-17973480_+	1.15284931979898	0.4104	1.2712142023755	0.2467
A_21_P0000215	ENSG00000142937	pseudogene	chr1:45241539-45241599_+	1.32521811194141	0.3515	1.93396242389706	0.0707992
A_21_P0000216	ENSG00000148303	pseudogene	chr9:136217708-136217768_+	0.780316925260874	0.3299	0.783918389088439	0.3027
A_21_P0000218	ENSG00000142541	protein_coding	chr19:49994450-49994510_+	0.94396097213905	0.473561	0.657360728716604	0.0809
A_21_P0000222	ENSG00000200913	lncRNA	chr1:45242201-45242261_+	1.07913964998007	0.657801	1.14509932373325	0.748817
A_21_P0000223	ENSG00000207445	lncRNA	chr11:75115550-75115610_+	1.24376564863964	0.428459	1.23861390032526	0.618603
A_21_P0000225	ENSG00000100316	protein_coding	chr22:39709823-39709883_-	0.754160096033191	0.208942	0.851876521595653	0.396279
A_21_P0000227	ENSG00000142534	protein_coding	chr19:50001003-50001063_+	1.01169961110372	0.766457	0.744963046305389	0.1664
A_21_P0000233	ENSG00000142937	pseudogene	chr1:45243523-45243583_+	0.846012784552597	0.3402	0.630552743775957	0.0483
A_21_P0000234	ENSG00000142937	pseudogene	chr1:45244070-45244130_+	0.748586220988912	0.1973	0.695077797082274	0.137
A_21_P0000235	ENSG00000168028	pseudogene	chr3:39449955-39450015_+	0.585269856956262	0.019	0.66661045256384	0.0737
A_21_P0000236	ENSG00000140988	protein_coding	chr16:2012982-2013042_-	1.25125865811388	0.208147	1.20490155264237	0.2721
A_21_P0000237	ENSG00000140988	protein_coding	chr16:2012334-2012394_-	1.00344090268871	0.956956	0.779235994273401	0.2172
A_21_P0000238	ENSG00000209042	lncRNA	chr20:47895500-47895560_+	1.44651646515643	0.1208	0.846904172197404	0.462731
A_21_P0000240	ENSG00000221500	lncRNA	chr6:133137956-133138016_+	1.17918459209886	0.411	0.919567801748522	0.503366
A_21_P0000242	ENSG00000008988	protein_coding	chr8:56986397-56986457_-	0.965391457178147	0.442085	1.09037675879434	0.966175
A_21_P0000243	ENSG00000100316	protein_coding	chr22:39715056-39715116_-	0.765624851988202	0.141406	1.2961515208042	0.181627
A_21_P0000244	ENSG00000174444	protein_coding	chr15:66795148-66795208_-	0.942900782228098	0.555493	1.61008343895312	0.274693
A_21_P0000250	ENSG00000148303	pseudogene	chr9:136217322-136217382_+	0.67455436000022	0.0999	0.596518705310802	0.0442
A_21_P0000251	ENSG00000201302	lncRNA	chr9:130210780-130210839_-	0.715574782752617	0.204605	1.44788511087915	0.174215
A_21_P0000252	ENSG00000167526	protein_coding	chr16:89627849-89627909_+	1.17924659749672	0.358034	1.23553229842256	0.477068
A_21_P0000254	ENSG00000255717	protein_coding	chr11:62620797-62620857_-	1.52656603986103	0.106362	1.31420094815652	0.444575
A_21_P0000258	ENSG00000255717	protein_coding	chr11:62622763-62622823_-	1.40848664701288	0.294183	2.02925585286329	0.0267294
A_21_P0000261	ENSG00000265681	protein_coding	chr18:47018033-47018093_-	1.10925295382755	0.811095	1.27924433288131	0.2163
A_21_P0000262	ENSG00000122026	protein_coding	chr13:27829603-27829663_+	0.632544617205931	0.138285	1.85866490984482	0.0502856
A_21_P0000263	ENSG00000125691	protein_coding	chr17:37009117-37009177_-	0.547982250223009	0.0145655	1.06460447209348	0.925135
A_21_P0000266	ENSG00000207067	lncRNA	chr8:99054313-99054373_-	0.977774509913069	0.720108	0.704905592750495	0.1578
A_21_P0000270	ENSG00000156976	protein_coding	chr3:186505151-186505211_+	1.02520560350882	0.815465	1.60859707065518	0.345794
A_21_P0000274	ENSG00000204628	protein_coding	chr5:180670313-180670373_-	1.12278088477772	0.626397	1.30328297715571	0.183602
A_21_P0000276	ENSG00000245910	protein_coding	chr8:67834708-67834768_-	0.993918040577584	0.566776	0.815387666631817	0.770535
A_21_P0000278	ENSG00000161960	protein_coding	chr17:7480216-7480276_+	1.06320313676309	0.978245	1.33987087397759	0.583536
A_21_P0000282	ENSG00000101361	pseudogene	chr20:2637280-2637340_+	0.914974964655901	0.602532	0.809419948989497	0.3255
A_21_P0000284	ENSG00000204387	protein_coding	chr6:31804856-31804916_+	0.926837599048998	0.783264	1.10154874747844	0.879866
A_21_P0000285	ENSG00000175061	protein_coding	chr17:16343360-16343420_+	0.665354717980137	0.0175812	0.930789694686333	0.786225
A_21_P0000286	ENSG00000204387	protein_coding	chr6:31803042-31803103_+	1.28011611334865	0.2417	1.15862195663114	0.721703
A_21_P0000287	ENSG00000234741	protein_coding	chr1:173833506-173833566_-	0.812511018013748	0.3639	0.582567148423465	0.0276
A_21_P0000295	ENSG00000264772	pseudogene	chr17:7481349-7481409_+	0.96135672179194	0.6699	0.643765408408324	0.0489
A_21_P0000298	ENSG00000200785	lncRNA	chr14:21865451-21865511_-	1.23777220974316	0.2241	1.46250789807872	0.0834
A_21_P0000300	ENSG00000161960	protein_coding	chr17:7478105-7478165_+	0.936183754681406	0.816517	1.07335000775269	0.716376
A_21_P0000301	ENSG00000206838	lncRNA	chr3:123532994-123533282_+\chr7:45143947-45144007_-	1.40785877951407	0.1169	1.29839776982392	0.1435
A_21_P0000302	ENSG00000166012	protein_coding	chr11:93465526-93465586_-	0.756626934314336	0.1139	0.721623106996879	0.1292
A_21_P0000305	ENSG00000115539	protein_coding	chr2:101192969-101193029_+	0.864650671758149	0.2396	0.893543066030957	0.5046
A_21_P0000307	ENSG00000207313	lncRNA	chr12:49061251-49061311_-	0.718139871558768	0.0817041	0.809137860752005	0.4442
A_21_P0000308	ENSG00000232956	lncRNA	chr7:45024977-45025037_-	1.15991980646969	0.3319	1.30202341101879	0.2192
A_21_P0000310	ENSG00000212464	lncRNA	chr10:101996931-101996991_-	0.873730069277679	0.61315	1.79498098044435	0.124663
A_21_P0000315	ENSG00000166012	protein_coding	chr11:93466631-93466691_-	1.08342494523783	0.831965	1.04324541140222	0.966387
A_21_P0000317	ENSG00000206634	lncRNA	chr7:65220580-65220640_+\chr7:64526444-64526504_+	1.3237924004439	0.176918	1.78020486118085	0.0512904
A_21_P0000318	ENSG00000269893	lncRNA	chr4:119200415-119200475_+	0.829372783319348	0.27816	0.805383946252028	0.299116
A_21_P0000321	ENSG00000133112	protein_coding	chr13:45911642-45911702_-	0.773286155293393	0.14761	0.38461488278284	0.00181172
A_21_P0000322	ENSG00000221491	lncRNA	chr12:49048164-49048224_-	1.69745541712474	0.0601005	1.78897808710839	0.039065
A_21_P0000325	ENSG00000207233	lncRNA	chr18:51748689-51748749_-	1.12079046210636	0.3769	1.42121272837169	0.0973
A_21_P0000329	ENSG00000207475	lncRNA	chr1:155889730-155889790_-	0.740020534322077	0.139495	1.13719938970176	0.373
A_21_P0000332	ENSG00000212607	lncRNA	chr12:84577143-84577200_-\chr11:8707012-8707072_+	0.655536796202145	0.0443	0.872970738663028	0.583176
A_21_P0000334	ENSG00000208892	lncRNA	chr12:132515830-132515890_+	1.25315335718863	0.2149	1.49559832227334	0.0546
A_21_P0000336	ENSG00000207008	lncRNA	chr11:2985000-2985060_-	0.939440108834172	0.723333	1.25825621913625	0.690254
A_21_P0000341	ENSG00000197989	protein_coding	chr1:28906275-28906335_-	0.561463373713271	0.0069	0.986089496176063	0.872705
A_21_P0000344	ENSG00000144713	protein_coding	chr3:12881813-12881873_-	1.47427086724871	0.0554	1.35335221217804	0.1377
A_21_P0000347	ENSG00000266402	lncRNA	chr17:62223721-62223781_+	0.536524012960593	0.0107858	1.21027743878519	0.791632
A_21_P0000348	ENSG00000200792	lncRNA	chr2:10586842-10586898_-\chr21:33749495-33749555_-	1.21539243451103	0.3579	0.821670254288827	0.3541
A_21_P0000349	ENSG00000252906	lncRNA	chr1:175937545-175937605_-	1.20059224174543	0.297879	1.02582094644512	0.808468
A_21_P0000350	ENSG00000252577	lncRNA	chr17:58308876-58308936_-	1.42050256792189	0.0661	1.58123675784598	0.051
A_21_P0000351	ENSG00000249784	lncRNA	chr4:1976427-1976487_+	1.1920374087885	0.376478	2.46062780948464	0.0112975
A_21_P0000358	ENSG00000201512	lncRNA	chr20:37058309-37058369_-	1.7224769692332	0.0123	0.907154861589455	0.998652
A_21_P0000359	ENSG00000200354	lncRNA	chr20:37062509-37062569_-	1.31005445831268	0.1809	1.24516961846628	0.2547
A_21_P0000360	ENSG00000221643	lncRNA	chr1:203698751-203698811_+	1.4140860235476	0.0649	1.25551005328307	0.2439
A_21_P0000363	ENSG00000166012	lncRNA	chr11:93463678-93463738_-	0.99802711659668	0.678227	0.758365587691372	0.322437
A_21_P0000365	ENSG00000212304	lncRNA	chr20:47897246-47897306_+	1.78028206917604	0.0113	0.757181997386882	0.253419
A_21_P0000366	ENSG00000238317	lncRNA	chr2:203157797-203157857_+	1.24813482623085	0.400881	0.382174373533738	0.000350945
A_21_P0000367	ENSG00000166012	protein_coding	chr11:93464144-93464204_-	0.730000891481552	0.103042	0.82877261967215	0.411466
A_21_P0000368	ENSG00000166012	protein_coding	chr11:93466393-93466453_-	0.992778442789188	0.673374	0.825236185680758	0.3478
A_21_P0000369	ENSG00000197989	protein_coding	chr1:28907431-28907491_-	0.64743345210294	0.0919264	1.39116701234167	0.260706
A_21_P0000373	ENSG00000203875	protein_coding	chr6:86387306-86387366_-	0.741970333219018	0.0801825	0.40028378448316	0.00054627
A_21_P0000386	ENSG00000163162	pseudogene	chr2:101889397-101889457_-	1.48409214661006	0.0581	1.07993662626638	0.587509
A_21_P0000393	ENSG00000221539	lncRNA	chr1:28905260-28905320_-	0.934433353632479	0.664327	1.0219829271609	0.999479
A_21_P0000394	ENSG00000101361	pseudogene	chr20:2634868-2634928_+	2.17922292339645	0.0154518	1.59536477122486	0.157709
A_21_P0000397	ENSG00000238835	lncRNA	chr5:82360022-82360082_-	1.65986964600198	0.025	1.87125829192588	0.0064
A_21_P0000463	ENSG00000238531	lncRNA	chr19:10220456-10220516_+	0.720781222302716	0.1055	0.675812361705849	0.0442
A_21_P0000472	ENSG00000265681	protein_coding	chr18:47015604-47015664_-	1.51993415237414	0.0597803	1.16106494859179	0.2993
A_21_P0000473	ENSG00000239183	lncRNA	chr9:95054742-95054802_-	0.948740998920038	0.912363	1.42470144816049	0.0843
A_21_P0000475	ENSG00000206637	lncRNA	chr1:201947646-201947706_+\chr2:61644395-61644455_-	0.851136519034524	0.4391	0.431440040516635	0.0012
A_21_P0000476	ENSG00000230734	pseudogene	chr9:119943346-119943406_-	1.10593927072989	0.841381	0.410883149350688	0.0008
A_21_P0000477	ENSG00000221102	lncRNA	chr14:91592836-91592896_+	1.10780998085043	0.921248	0.799710654817155	0.231933
A_21_P0000478	ENSG00000221102	lncRNA	chr14:91592793-91592849_+\chrX:47248071-47248131_+	0.825837103626933	0.460144	0.716911080639037	0.067
A_21_P0000479	ENSG00000154545	pseudogene	chrX:51933784-51933844_+	1.24820917263323	0.2813	1.23489629783836	0.2514
A_21_P0000482	ENSG00000234741	protein_coding	chr1:173833970-173834030_-	0.945262198689202	0.680317	0.878887119049312	0.373
A_21_P0000484	ENSG00000234741	protein_coding	chr1:173835772-173835832_-	1.13842531416877	0.902178	1.06584074380888	0.973803
A_21_P0000489	ENSG00000199753	lncRNA	chr17:62223457-62223517_+	1.24713517751971	0.2498	0.80175010468523	0.3053
A_21_P0000491	ENSG00000267631	Poorly Annotated	chr19:49540321-49540381_+	1.27851803217815	0.2005	1.00309388140741	0.804236
A_21_P0000492	ENSG00000131409	Poorly Annotated	chr19:51108270-51108330_+	0.620676292272769	0.0416	0.646223110515224	0.0603
A_21_P0000494	ENSG00000201544	lncRNA	chr1:212526232-212526292_+	0.860223978084886	0.57908	1.42639694363814	0.260002
A_21_P0000495	ENSG00000214756	pseudogene	chr11:62432980-62433040_+	0.807545751532672	0.1694	0.959560941691884	0.573551
A_21_P0000500	ENSG00000101361	pseudogene	chr20:2636768-2636828_+	1.03356496160949	0.709552	0.790967229513357	0.3249
A_21_P0000501	ENSG00000110321	protein_coding	chr11:10823013-10823073_-	2.30260315414324	0.00116362	1.07186296994228	0.880766
A_21_P0000502	ENSG00000270103	lncRNA	chr1:28975177-28975237_+	0.624121632745709	0.0427	1.09187839221852	0.408491
A_21_P0000503	ENSG00000264229	lncRNA	chr2:122288525-122288585_+	0.385355766066617	0.00564585	1.02635654029332	0.729462
A_21_P0000506	ENSG00000264538	pseudogene	chr17:29096997-29097057_+	0.956281040248607	0.780979	0.842898719054051	0.4207
A_21_P0000508	ENSG00000267890	Poorly Annotated	chr19:50643468-50643528_-	0.607780607038511	0.0546	0.46215017322358	0.0028
A_21_P0000509	ENSG00000267335	Poorly Annotated	chr19:49534933-49534993_-	0.579927220633521	0.0234	0.571576802374679	0.0225
A_21_P0000510	ENSG00000238105	pseudogene	chr12:100559242-100559302_-	1.64430178467824	0.0427	1.18439414633992	0.210986
A_21_P0000511	lnc-REG3G-8	Poorly Annotated	chr2:78182043-78182103_-	0.61320779913774	0.0503	0.500042908654133	0.0057
A_21_P0000512	ENSG00000205835	Poorly Annotated	chr3:190595729-190595789_+	1.0979767585641	0.535123	0.938363489014457	0.794289
A_21_P0000520	lnc-PPP4C-8	lncRNA	chr16:30125614-30125674_+	0.853648874058927	0.3587	0.786978574528749	0.2762
A_21_P0000530	ENSG00000175061	protein_coding	chr17:16344469-16344529_+	1.04273180812766	0.89727	1.00032902982382	0.826136
A_21_P0000534	ENSG00000111669	protein_coding	chr12:6979693-6979752_+	0.749467474014236	0.2092	0.706028796622492	0.1433
A_21_P0000535	ENSG00000196668	protein_coding	chr12:116974256-116974316_+	2.78318445940979	0.000134486	0.91924088413284	0.549322
A_21_P0000536	ENSG00000180233	protein_coding	chr7:30324432-30324492_+	1.19215723201651	0.360898	0.979535349013667	0.597162
A_21_P0000563	ENSG00000206633	lncRNA	chr2:10586902-10586962_-	0.938531182689148	0.815378	1.13981187630188	0.941564
A_21_P0000566	ENSG00000185651	protein_coding	chr22:21978258-21978318_+	1.35496735308478	0.1702	1.20253686233471	0.2861
A_21_P0000572	ENSG00000236618	lncRNA	chr17:1421251-1421311_+	0.986549473870678	0.602145	1.0004332383038	0.895431
A_21_P0000574	ENSG00000145545	protein_coding	chr5:6669438-6669498_+	1.48090852452508	0.0539	1.56182637174808	0.0431
A_21_P0000583	ENSG00000272447	lncRNA	chr2:128644665-128644855_+\chr10:81587227-81587327_+	1.11683389542302	0.738862	1.16574828610053	0.4
A_21_P0000585	ENSG00000170043	protein_coding	chr17:7833662-7833722_-	1.23941435971043	0.3177	1.08171875792501	0.4622
A_21_P0000586	lnc-MAGEE2-3	lncRNA	chrX:74960432-74960492_-	0.938805786207713	0.56426	1.78084266052616	0.0107371
A_21_P0000588	ENSG00000233101	lncRNA	chr17:46679649-46679703_+	1.49075192581231	0.0625	1.44329172120129	0.0974
A_21_P0000591	ENSG00000201945	lncRNA	chr12:121544918-121544968_+\chr2:165544152-165544212_-	1.32394681778107	0.1589	0.611408356877653	0.0397
A_21_P0000592	ENSG00000206650	lncRNA	chr12:69021013-69021073_-	0.805611445037991	0.3404	0.460932319867011	0.0022
A_21_P0000593	ENSG00000263666	lncRNA	chr16:71732469-71732529_-	0.822258955024332	0.3557	0.409936299845963	0.0007
A_21_P0000597	ENSG00000234575	pseudogene	chr9:90460800-90460860_+	1.55580687264228	0.0332	3.64312860226284	0.0135671
A_21_P0000598	ENSG00000107829	protein_coding	chr10:103370434-103370494_-	1.2639326688075	0.2334	1.19675139658275	0.231
A_21_P0000602	ENSG00000169020	protein_coding	chr4:666224-666279_-	0.603618743711844	0.0483	0.942751715768783	0.703675
A_21_P0000607	lnc-RP11-712L6.5.1-2	lncRNA	chr11:126211613-126211673_-	2.77877268184595	6.91643e-05	2.78312372564974	0.00397566
A_21_P0000611	ENSG00000254531	protein_coding	chr4:102269985-102270176_+	1.12268654358763	0.5023	0.847303033024498	0.4498
A_21_P0000629	lnc-SARS-2	lncRNA	chr1:109759719-109759779_+	1.19287306818914	0.2874	0.954465094997717	0.895387
A_21_P0000635	ENSG00000227487	lncRNA	chr11:113140264-113140324_-	1.95898324667892	0.00249824	1.30311583501074	0.2034
A_21_P0000636	lnc-KIAA1919-3	lncRNA	chr6:111899252-111899312_+	1.01753036568816	0.938325	0.900135796438678	0.5147
A_21_P0000637	ENSG00000231889	lncRNA	chr6:111824663-111824723_+	1.32311289662976	0.158	0.867141014806038	0.4957
A_21_P0000651	lnc-GOLGA8IP-2	lncRNA	chr15:20727026-20727086_+\chr15:23393819-23393879_+	0.549048302018611	0.016944	0.482968729390019	0.0251809
A_21_P0000662	ENSG00000225449	pseudogene	chr2:130724207-130724267_-	0.86103499814258	0.512602	1.99957012430194	0.0539091
A_21_P0000668	ENSG00000229186	pseudogene	chr12:112339589-112339649_+	1.00289717114575	0.842825	0.802662051173838	0.339921
A_21_P0000671	ENSG00000169715	protein_coding	chr16:56667753-56667813_+\chr16:56660882-56660942_+	1.21596947086734	0.2957	0.697215223665329	0.0893
A_21_P0000674	ENSG00000232528	pseudogene	chr20:1754011-1754071_-	1.0285883255164	0.853847	0.849380063673469	0.3474
A_21_P0000679	ENSG00000272888	lncRNA	chr15:93441917-93441977_+	1.49080312731605	0.0691	1.4519187645243	0.0373858
A_21_P0000682	ENSG00000230124	lncRNA	chr1:180238825-180238885_-	2.84365114394777	0.000600704	2.92792720096172	0.00300096
A_21_P0000684	ENSG00000145592	protein_coding	chr5:40825481-40825541_-	1.19321642918012	0.694061	1.07538933669935	0.49161
A_21_P0000694	ENSG00000236859	lncRNA	chr2:122408630-122408690_+	1.39496052049744	0.137	0.906909065188299	0.5638
A_21_P0000707	ENSG00000138161	protein_coding	chr10:124608698-124608758_-\chr10:124672474-124672514_+	0.599852073181623	0.078	0.642338075080467	0.0629
A_21_P0000714	ENSG00000163597	lncRNA	chr17:74561358-74561418_+	1.10552473044172	0.630875	0.981286800484423	0.746145
A_21_P0000715	ENSG00000132478	lncRNA	chr17:73790092-73790152_+	0.597846664874809	0.0368	0.830083083681508	0.2285
A_21_P0000717	ENSG00000181038	protein_coding	chr17:74729874-74729934_+	0.967505738128599	0.992632	1.26776752374564	0.2951
A_21_P0000732	ENSG00000269386	lncRNA	chr19:8439314-8439374_-	1.23387355239549	0.3123	1.15361574730256	0.4038
A_21_P0000744	ENSG00000257698	protein_coding	chr12:58329668-58329728_-	0.592591495199395	0.009	0.459371389515655	0.0022
A_21_P0000750	ENSG00000228109	lncRNA	chr3:196731527-196731587_+	0.946809158507476	0.5654	0.741006716597506	0.2113
A_21_P0000751	ENSG00000239653	lncRNA	chr3:63997695-63997755_+	1.8003182270214	0.0168268	1.31567641294993	0.28077
A_21_P0000754	ENSG00000251497	lncRNA	chr12:123569224-123569284_+	1.38209288794692	0.1274	1.12907296094178	0.4221
A_21_P0000756	lnc-HIST1H2AI-3	lncRNA	chr6:27670132-27670192_+	1.13360667790125	0.449036	1.16311811532878	0.425904
A_21_P0000760	ENSG00000255274	lncRNA	chr11:117929893-117929953_-	1.16143734970007	0.3049	1.60170855732451	0.0259
A_21_P0000778	ENSG00000272589	lncRNA	chr10:75556275-75556335_-	1.82040223611404	0.0117	1.45911693128803	0.0591
A_21_P0000781	ENSG00000233429	lncRNA	chr7:27139800-27139860_+	0.532091841415822	0.0130791	0.428999434668005	0.0856062
A_21_P0000785	lnc-PIGC-1	lncRNA	chr1:172107801-172107861_-	1.07379542332785	0.5537	1.16635691773994	0.3329
A_21_P0000808	ENSG00000247240	lncRNA	chr15:74773445-74773505_+	0.893280077569113	0.5167	1.01908303366503	0.658912
A_21_P0000829	ENSG00000246067	lncRNA	chr11:82784560-82784620_+	0.700162633221265	0.1109	1.20500823938495	0.308825
A_21_P0000841	ENSG00000239911	lncRNA	chr7:151576125-151576185_+	0.756169981046893	0.2316	0.852584213191787	0.502611
A_21_P0000847	lnc-GGCX-3	lncRNA	chr2:85764716-85764776_-	1.41717315756994	0.0828	1.66532492082486	0.0366756
A_21_P0000865	ENSG00000249346	lncRNA	chr6:33857414-33857474_-	1.5513062273689	0.0399	1.30221083183086	0.1735
A_21_P0000867	ENSG00000241560	lncRNA	chr3:114107765-114107825_+	1.30096707688057	0.1714	0.861468327704398	0.4961
A_21_P0000892	lnc-SEPT9-3	lncRNA	chr17:75560918-75560978_+	1.46873001626151	0.0746	1.30538073727721	0.1963
A_21_P0000910	lnc-MIB2-1	lncRNA	chr1:1542656-1542716_+	1.33379987863658	0.1311	1.20076176599599	0.3153
A_21_P0000919	ENSG00000237292	lncRNA	chr1:181144483-181144543_+	1.64541652979536	0.018	1.18114314878876	0.3789
A_21_P0000941	ENSG00000230415	lncRNA	chr1:1214496-1214556_+	1.35627743869872	0.1306	1.09616359183437	0.631619
A_21_P0000949	ENSG00000235643	lncRNA	chr1:11672884-11672944_+	1.1560252373077	0.4224	0.978856211721507	0.915514
A_21_P0000951	ENSG00000224174	lncRNA	chr1:16848230-16848290_+\chr1:17215045-17215105_-	0.891846441666409	0.3726	0.613476074326758	0.041
A_21_P0001037	ENSG00000231599	lncRNA	chr1:187412803-187413088_+	1.0893923666138	0.614793	1.6526840492279	0.056846
A_21_P0001050	ENSG00000228288	lncRNA	chr1:202780981-202781041_+	2.18752279909967	0.0021	1.50844238209381	0.564072
A_21_P0001100	ENSG00000237445	lncRNA	chr1:13986125-13986185_-	0.782269338833723	0.1535	0.895388804219674	0.5241
A_21_P0001142	ENSG00000178193	lncRNA	chr1:76186029-76186074_-	1.64268096280082	0.0209	1.2596888856592	0.2564
A_21_P0001153	ENSG00000223745	lncRNA	chr1:93804909-93804969_-	1.21099169008295	0.3492	1.8234320742366	0.012
A_21_P0001196	ENSG00000236535	lncRNA	chr1:173978404-173978464_-	1.4633542344016	0.0755825	1.07556485583337	0.63184
A_21_P0001238	ENSG00000233461	lncRNA	chr1:231663083-231663140_-	2.25496970592315	0.0005	2.73683557744877	0.000118476
A_21_P0001239	ENSG00000233461	lncRNA	chr1:231663083-231663139_-	3.06635366749065	7.62088e-05	2.51766220235527	0.0003
A_21_P0001244	ENSG00000238005	lncRNA	chr1:235095435-235095495_-	1.23220538552999	0.285	1.12788125553432	0.495262
A_21_P0001246	ENSG00000238005	lncRNA	chr1:235097186-235097246_-	1.41688941106444	0.0861	0.908769441344914	0.6069
A_21_P0001254	lnc-MIB2-1	lncRNA	chr1:1538250-1538310_+	1.49310461021982	0.0514	1.36725870705942	0.1443
A_21_P0001273	ENSG00000225643	lncRNA	chr1:25916815-25916875_+	1.26658200167725	0.342	0.966392855279121	0.707754
A_21_P0001300	lnc-BSND-1	lncRNA	chr1:55462641-55462701_+	1.07742973073858	0.623339	1.06093501322399	0.737229
A_21_P0001364	lnc-DDX20-4	lncRNA	chr1:112550632-112550692_+	1.06257564202384	0.680689	1.18142528695213	0.3479
A_21_P0001365	ENSG00000198799	protein_coding	chr1:113674686-113674746_+	1.21422243515768	0.2068	0.924926556856747	0.77497
A_21_P0001374	ENSG00000225241	pseudogene	chr1:144594427-144594482_+\chr1:148556754-148556810_+	0.773931266942449	0.2953	0.589478799396948	0.0309
A_21_P0001457	ENSG00000226969	lncRNA	chr1:1980767-1980827_-	0.866437234049375	0.4173	1.47669066451353	0.0512911
A_21_P0001467	ENSG00000162490	protein_coding	chr1:11786467-11786527_-	1.51910643249594	0.0354	1.15339382286895	0.3626
A_21_P0001470	lnc-C1orf195-2	lncRNA	chr1:14924396-14924456_-	1.41994320154451	0.0917	1.32898499113608	0.1427
A_21_P0001545	ENSG00000233593	lncRNA	chr1:91248675-91248735_-	1.64856725807364	0.0122	1.65376997706042	0.0622004
A_21_P0001550	ENSG00000223745	lncRNA	chr1:93803949-93804009_-	1.66957183295264	0.0179	1.23058828274797	0.227664
A_21_P0001666	lnc-CDC42-1	lncRNA	chr1:22584373-22584433_+	1.33706626874168	0.1732	1.04132813417343	0.741784
A_21_P0001673	lnc-NDUFS5-1	lncRNA	chr1:39508450-39508510_+	1.5430769102425	0.0265668	1.19805681096106	0.2695
A_21_P0001689	ENSG00000237413	lncRNA	chr1:78716026-78717206_+	1.82427137741351	0.0066	1.04923241410937	0.790411
A_21_P0001704	lnc-AL592284.1-1	lncRNA	chr1:144594767-144594827_+\chr1:148557094-148557154_+	0.810398481176822	0.215749	0.39181763391281	0.0003
A_21_P0001724	ENSG00000224311	lncRNA	chr1:27560781-27560841_-	1.13188051280106	0.4067	1.66426081324742	0.029
A_21_P0001741	lnc-CDH9-13	lncRNA	chr1:148933291-148933351_-\chr5:28927058-28927118_-	1.39518759990078	0.1173	1.16580062493694	0.325
A_21_P0001752	lnc-FAIM3-1	lncRNA	chr1:207096871-207096931_-	1.21352538980708	0.3126	0.925441955257445	0.6148
A_21_P0001773	ENSG00000239332	pseudogene	chr2:47086041-47086101_+	1.56062356740702	0.0324	1.40948374116695	0.1044
A_21_P0001777	ENSG00000234028	lncRNA	chr2:88931030-88931090_+	0.4284183501569	0.0158854	0.835274099830735	0.586451
A_21_P0001790	ENSG00000234572	lncRNA	chr2:65073266-65073326_-	1.18013329738868	0.4231	1.5393449037024	0.0512
A_21_P0001793	ENSG00000235480	lncRNA	chr2:97193679-97193739_-	1.35056878506678	0.1124	1.07919350646611	0.704626
A_21_P0001802	ENSG00000238062	lncRNA	chr2:231852259-231852319_-	1.51093480433796	0.0309	1.52054193442183	0.0453
A_21_P0001811	lnc-TRAPPC12-3	lncRNA	chr2:2876303-2876363_+	1.40068753646471	0.1069	1.41580055829335	0.0977
A_21_P0001837	ENSG00000223536	lncRNA	chr2:16946341-16946393_+	1.50358335838152	0.0578	1.17162906751954	0.3591
A_21_P0001847	ENSG00000224165	lncRNA	chr2:25195631-25195691_+	1.25648783161387	0.2764	1.1386130555117	0.4312
A_21_P0001879	lnc-AC073263.1-2	lncRNA	chr2:74380946-74381006_+	1.1367226035411	0.3435	1.22547206821193	0.2835
A_21_P0001900	ENSG00000232991	lncRNA	chr2:108428744-108428804_+	1.31357529057931	0.2007	1.35070178633722	0.1321
A_21_P0001917	ENSG00000224231	lncRNA	chr2:138863309-138863369_+	1.38142478916684	0.1105	1.16026564494452	0.3963
A_21_P0001935	ENSG00000239467	lncRNA	chr2:171634192-171634252_+	1.10837647882552	0.592957	0.860096156775789	0.287255
A_21_P0001948	ENSG00000229395	lncRNA	chr2:193510199-193510259_+	2.38615914150051	0.00364649	1.38226997025258	0.20028
A_21_P0001971	ENSG00000227308	lncRNA	chr2:220602242-220602302_+	1.39468418830763	0.131	1.3139128882172	0.1241
A_21_P0001995	ENSG00000237401	lncRNA	chr2:4020504-4020564_-	1.45454994236338	0.0816	1.11237374744079	0.46
A_21_P0002024	ENSG00000231266	lncRNA	chr2:16408351-16408411_-	0.940368112602984	0.566774	1.71665994411925	0.0213955
A_21_P0002061	ENSG00000237179	lncRNA	chr2:66924296-66924356_-	1.02956810327627	0.837023	1.42102149078334	0.0717105
A_21_P0002073	ENSG00000237837	lncRNA	chr2:98069642-98069702_-	0.978827664273193	0.762037	0.80170911732074	0.3424
A_21_P0002242	ENSG00000225439	lncRNA	chr2:74375292-74375352_+	1.4082561950951	0.1007	1.29851271281411	0.1992
A_21_P0002256	lnc-THNSL2-1	lncRNA	chr2:88584578-88584638_+	1.2547276552281	0.2769	1.00958986348097	0.911516
A_21_P0002266	ENSG00000232001	lncRNA	chr2:107160633-107160693_+	0.985527336965256	0.754792	1.06946383342437	0.588418
A_21_P0002294	ENSG00000062370	protein_coding	chr19:44871262-44871322_-	1.62692784637351	0.0718	1.23292991260502	0.324462
A_21_P0002446	lnc-USP34-1	lncRNA	chr2:61367941-61368001_-	1.56852022081053	0.0381	1.02292872912845	0.832276
A_21_P0002492	ENSG00000237753	lncRNA	chr2:113402748-113402808_-	1.06799593024003	0.70522	1.2803495377796	0.1522
A_21_P0002505	lnc-C2orf27B-3	lncRNA	chr2:132227287-132227347_-	0.620497813666547	0.1095	0.816628435005339	0.346755
A_21_P0002566	lnc-SOX11-3	lncRNA	chr2:6142004-6142064_+	1.63780363192924	0.0259	1.06107717234085	0.481602
A_21_P0002584	lnc-LCLAT1-2	lncRNA	chr2:31058129-31058189_+	1.60394354855465	0.0316	1.17384722923566	0.3788
A_21_P0002614	lnc-LYPD6-1	lncRNA	chr2:150146621-150146681_+	1.6425578720594	0.0186	1.01317367922073	0.827541
A_21_P0002619	lnc-AC007405.7.1-2	lncRNA	chr2:171626803-171626863_+	1.30646006473535	0.1806	0.979350113584191	0.798382
A_21_P0002650	lnc-HS1BP3-1	lncRNA	chr2:20739196-20739256_-	1.07999050399914	0.4914	1.10607601793409	0.548843
A_21_P0002693	lnc-AC110619.2.1-1	lncRNA	chr2:241320862-241320922_-	1.48234414336242	0.0686	1.17206491645362	0.319
A_21_P0002702	ENSG00000224424	lncRNA	chr3:48889354-48889414_+	1.99863618093859	0.0315972	2.37075687906377	0.00167531
A_21_P0002768	ENSG00000240562	lncRNA	chr3:127209459-127209519_+	0.982956254505236	0.807484	1.10057777590406	0.5169
A_21_P0002837	ENSG00000231249	lncRNA	chr3:4532577-4532637_-	1.68234574146504	0.0163	1.287030655131	0.2307
A_21_P0002850	ENSG00000225873	lncRNA	chr3:44462618-44462678_-	2.06937515685189	0.0008	1.25330265230737	0.227755
A_21_P0002865	ENSG00000239767	lncRNA	chr3:86313704-86313764_-	0.303879804280288	0.00517771	0.761048644363957	0.421693
A_21_P0002876	lnc-RP11-723O4.6.1-1	lncRNA	chr3:128719476-128719910_-	1.26422193835092	0.1955	1.52749839631275	0.0496
A_21_P0002932	ENSG00000224514	lncRNA	chr3:13759171-13759231_+	1.44045971980105	0.0847	1.25562111339755	0.2269
A_21_P0002940	ENSG00000272282	lncRNA	chr3:27755352-27755412_+	1.2696426554324	0.2305	1.1012365257254	0.4991
A_21_P0002976	lnc-GPR27-2	lncRNA	chr3:72045493-72045553_+	1.05164995877863	0.647521	1.78256647199883	0.0111
A_21_P0003042	ENSG00000196428	protein_coding	chr3:150184091-150184151_+	2.26726667898866	0.0135466	1.73883294188718	0.0113
A_21_P0003114	ENSG00000225873	lncRNA	chr3:44462624-44462684_-	1.62914961963841	0.0219	1.45202034506896	0.0687
A_21_P0003116	lnc-CDC25A-1	lncRNA	chr3:48247703-48247763_-	1.01816283079042	0.880133	1.02812584725659	0.855798
A_21_P0003137	ENSG00000255823	protein_coding	chr11:10530246-10530306_-\chr5:79946377-79946437_-\chr3:96336590-96336650_-	0.708026545065141	0.1297	1.11412190274856	0.842409
A_21_P0003212	ENSG00000260261	lncRNA	chr3:195367180-195367240_+\chr3:195676149-195676209_-	0.844972143202982	0.236617	0.844255417175299	0.271419
A_21_P0003213	ENSG00000188002	pseudogene	chr5:1628869-1628926_-	0.615733311978689	0.0720237	0.883705948466857	0.397127
A_21_P0003214	lnc-CHL1-1	lncRNA	chr3:109184-109357_+	1.37579805857113	0.0993	0.960977506946239	0.6889
A_21_P0003216	lnc-THUMPD3-1	lncRNA	chr3:9291438-9291498_+	0.939454839572151	0.719782	2.24913284541115	0.000972783
A_21_P0003219	lnc-OXNAD1-1	lncRNA	chr3:16569655-16569715_+	1.3145406685915	0.2491	1.28277093541151	0.199
A_21_P0003243	lnc-EPHA6-1	lncRNA	chr3:96336909-96336969_+\chr5:79946696-79946756_+	1.19311465499632	0.3269	1.83612879314713	0.00664105
A_21_P0003245	lnc-EPHA6-1	lncRNA	chr3:96336741-96337006_+\chr5:79946528-79946793_+	1.25412357708257	0.246078	1.91842764602201	0.0101505
A_21_P0003278	lnc-WNT7A-1	lncRNA	chr3:13691791-13691851_-	1.62227038820709	0.0328	1.3628743873259	0.1483
A_21_P0003289	ENSG00000269028	protein_coding	chr3:96335998-96336058_-	1.49363816558516	0.474764	0.952089965706486	0.758314
A_21_P0003290	ENSG00000255823	protein_coding	chr5:79946319-79946613_-\chr11:10530193-10530482_-\chr3:96336532-96336826_-	0.705072593715331	0.1042	1.04757665885309	0.955467
A_21_P0003294	NONHSAG035768	lncRNA	chr3:113432277-113432337_-	1.49482832230489	0.324984	1.15625507686528	0.423967
A_21_P0003308	ENSG00000043093	protein_coding	chr3:182703608-182703645_-	1.16517667183589	0.4082	1.13379234082852	0.4452
A_21_P0003332	ENSG00000248986	lncRNA	chr4:8325508-8325568_+	1.41303568686272	0.0652	1.26124434704437	0.2266
A_21_P0003364	ENSG00000248518	lncRNA	chr4:55242827-55242887_+	1.76424431163303	0.016	1.31846256996389	0.1563
A_21_P0003384	ENSG00000251170	lncRNA	chr4:105253406-105253466_+	1.28596343020334	0.277703	1.47924304006091	0.0677361
A_21_P0003404	ENSG00000249000	lncRNA	chr4:135701497-135710410_+	1.68300345368464	0.0476612	1.21747545908347	0.309
A_21_P0003432	ENSG00000251061	lncRNA	chr4:171293402-171293462_+	1.42277928965618	0.1116	1.12806950293445	0.4049
A_21_P0003493	ENSG00000250791	lncRNA	chr4:117410534-117410594_-	0.862974973750377	0.393	0.871256136916399	0.4826
A_21_P0003526	ENSG00000251377	lncRNA	chr4:153128587-153128647_-	2.7297847781313	0.000338136	1.24463545742768	0.2613
A_21_P0003558	lnc-CRIPAK-1	lncRNA	chr4:1555047-1555107_+	0.912179349535252	0.5053	1.12152128082928	0.324191
A_21_P0003579	lnc-CPEB2-5	lncRNA	chr4:14063960-14094861_+	1.36702707386615	0.136	1.25068264094282	0.2609
A_21_P0003588	ENSG00000109689	pseudogene	chr4:26860300-26860360_+	0.735291605883546	0.0585226	0.841245346565326	0.412348
A_21_P0003595	ENSG00000067167	protein_coding	chr8:71485764-71485824_-	0.724292726610024	0.1991	1.34421430710193	0.169
A_21_P0003658	lnc-USP38-1	lncRNA	chr4:143778894-143778954_+	1.45845583524899	0.067	1.13286209515419	0.4228
A_21_P0003722	lnc-RAB28-4	lncRNA	chr4:12471482-12471542_-	1.21875722873999	0.2994	1.25414767437973	0.22183
A_21_P0003854	ENSG00000251603	lncRNA	chr4:152591560-152591620_+	2.93966417622496	0.0136894	5.35246274040082	0.00413449
A_21_P0003882	lnc-CTBP1-1	lncRNA	chr4:1282951-1283011_-	1.19814852364573	0.288997	1.81547182333187	0.0143
A_21_P0003886	lnc-STX18-1	lncRNA	chr4:4576854-4576914_-	1.37904128978806	0.149	1.26203349336137	0.2168
A_21_P0003914	lnc-ENPP6-1	lncRNA	chr4:185192864-185192924_-	1.77570023055227	0.0085	1.29337527814706	0.2119
A_21_P0003936	ENSG00000251575	lncRNA	chr5:61028622-61028682_-	1.47594361638319	0.0645	1.19855850062055	0.3882
A_21_P0003951	ENSG00000249830	lncRNA	chr5:3461657-3461717_+	0.982659169821455	0.779255	1.86174731659528	0.00397118
A_21_P0004047	ENSG00000251542	lncRNA	chr5:113915549-113915609_+	0.588630233890204	0.0287	1.02474356502699	0.961692
A_21_P0004072	ENSG00000248842	lncRNA	chr5:145780635-145781127_+	1.3037417668451	0.158	1.41846785169308	0.1098
A_21_P0004121	ENSG00000250583	lncRNA	chr5:33519990-33520050_-	0.88753222901299	0.518861	1.53606009488864	0.0489
A_21_P0004128	lnc-EMB-3	lncRNA	chr5:50265524-50265584_-	0.862291911572232	0.587211	1.33380175497269	0.1113
A_21_P0004161	ENSG00000250806	lncRNA	chr5:99989891-99989951_-	0.938921940171947	0.5246	1.95316878414545	0.00516427
A_21_P0004241	lnc-AC091435.2-1	lncRNA	chr5:38793085-38793145_+	1.72185522877339	0.0123	1.37683328180149	0.1365
A_21_P0004255	ENSG00000152931	lncRNA	chr5:59785604-59785664_+	1.43229621870573	0.1029	0.982079826502038	0.741226
A_21_P0004274	ENSG00000247828	lncRNA	chr5:87581608-87581668_+	0.468602809431222	0.0038	0.533290537351598	0.0063
A_21_P0004289	lnc-RP11-43D2.2.1-10	lncRNA	chr5:124310980-124311040_+	1.65062612588235	0.0249	1.41177239867072	0.0804
A_21_P0004341	ENSG00000170091	protein_coding	chr5:173670160-173670220_+	1.46489702883392	0.0447	1.71327191034127	0.0248
A_21_P0004402	lnc-C5orf43-3	lncRNA	chr5:60920944-60921004_-	1.76705675001679	0.0073	1.35378589286637	0.1233
A_21_P0004468	lnc-FBXW11-2	lncRNA	chr5:171150037-171150097_-	1.15889444065027	0.4633	0.805222968505367	0.3114
A_21_P0004479	lnc-MGAT1-2	lncRNA	chr5:180257149-180257209_-	1.2698327783905	0.2293	1.34862568089132	0.2136
A_21_P0004484	ENSG00000250056	lncRNA	chr5:6583857-6583917_+	0.927828535712741	0.719421	0.855273360629787	0.4266
A_21_P0004541	lnc-CPEB4-1	lncRNA	chr5:173220824-173220884_+	1.28301263575533	0.337	0.855817304682264	0.3987
A_21_P0004548	lnc-ZDHHC11-1	lncRNA	chr5:858993-859053_-	1.706297034098	0.0108	1.20145545800775	0.307
A_21_P0004566	lnc-ARRDC3-1	lncRNA	chr5:90603570-90603630_-	1.20348884986891	0.3487	0.683435516949873	0.0414
A_21_P0004593	ENSG00000250903	lncRNA	chr6:2283946-2284006_+	1.42212084850327	0.1125	1.89478213097086	0.0041
A_21_P0004621	ENSG00000226194	lncRNA	chr6:169773778-169773838_-	1.77406060585861	0.0078	2.08943789663664	0.003
A_21_P0004638	ENSG00000224157	lncRNA	chr6:28864451-28864507_+	1.58241201304279	0.0357	1.23078505742754	0.2555
A_21_P0004696	ENSG00000236537	lncRNA	chr6:158733327-158733387_+	0.761504339166866	0.164	0.660831461504161	0.0917
A_21_P0004709	ENSG00000228361	lncRNA	chr6:168641335-168641395_+	1.90138506953448	0.0036	1.46810879117362	0.0472
A_21_P0004750	lnc-SUPT3H-1	lncRNA	chr6:45539857-45539917_-	3.02335659080679	9.15786e-05	1.88904336765724	0.0116049
A_21_P0004794	ENSG00000232529	lncRNA	chr6:155701650-155701710_-	1.42407275337558	0.1006	1.05774318742321	0.716338
A_21_P0004805	ENSG00000224417	lncRNA	chr6:168701066-168701126_-	1.70375087797815	0.0105	1.32527658741049	0.1655
A_21_P0004813	lnc-IRF4-2	lncRNA	chr6:693988-694048_+	0.848342993883518	0.349315	1.10847977235182	0.591493
A_21_P0004860	ENSG00000112763	protein_coding	chr6:26476664-26476724_+	1.91408860178981	0.0126	0.985386002000293	0.876886
A_21_P0004863	ENSG00000261584	lncRNA	chr6:58182498-58182558_-\chr6:26687677-26687737_+	1.38172286202335	0.1362	1.0901715912945	0.539972
A_21_P0004864	ENSG00000261584	lncRNA	chr6:58182187-58182247_-\chr6:26687990-26688050_+	0.893102795445498	0.759207	0.553456708368147	0.0538886
A_21_P0004883	lnc-UBR2-1	lncRNA	chr6:42424600-42424660_+	1.54886071868499	0.0645213	1.42646282025528	0.0896
A_21_P0004895	lnc-BAI3-3	lncRNA	chr6:68707998-68708058_+	1.09406388305272	0.4677	1.52377959866895	0.047
A_21_P0004921	lnc-WISP3-2	lncRNA	chr6:112197385-112197726_+	1.51847452831995	0.0475	1.63837006300847	0.0316
A_21_P0004987	lnc-GMDS-4	lncRNA	chr6:1309571-1309631_-	0.958957113937061	0.851372	1.15733582385282	0.649547
A_21_P0004992	lnc-C6orf146-2	lncRNA	chr6:3926362-3926402_-	1.18640352741327	0.4053	0.928499475914096	0.6586
A_21_P0004995	lnc-ECI2-3	lncRNA	chr6:4399918-4399978_-	1.84792150216783	0.0071	1.03278620734956	0.984061
A_21_P0005002	lnc-CCDC90A-5	lncRNA	chr6:14448898-14448958_-	1.35010871097691	0.1441	1.0982682347304	0.5116
A_21_P0005023	ENSG00000227131	lncRNA	chr6:40239503-40239563_-	1.69945813251645	0.0229	1.35265289416506	0.1327
A_21_P0005036	NONHSAG044227	lncRNA	chr6:82553500-82553560_-	1.60247373492606	0.0265	1.36634394236162	0.1349
A_21_P0005079	lnc-LPA-1	lncRNA	chr6:161216425-161216485_-	1.34761314621516	0.1553	1.47597217840027	0.066
A_21_P0005099	ENSG00000223508	pseudogene	chr8:182128-182174_-	1.32704835238065	0.1737	1.0995134553019	0.4782
A_21_P0005100	ENSG00000250903	lncRNA	chr6:2272054-2272114_+	1.24148807634413	0.2137	1.78883151296895	0.0104
A_21_P0005117	ENSG00000271945	lncRNA	chr6:77485314-77485374_+	1.70935694025898	0.015	1.41514539534914	0.1267
A_21_P0005167	ENSG00000261080	lncRNA	chr6:45541136-45541196_-	1.00264280586477	0.925265	2.42997207143147	0.00104195
A_21_P0005187	lnc-DLL1-4	lncRNA	chr6:170453150-170453210_-	1.47585676896442	0.0621	1.44095730659505	0.0628
A_21_P0005228	ENSG00000234183	lncRNA	chr7:44889104-44889164_+	1.08613139844143	0.668389	1.32052735552704	0.1565
A_21_P0005262	ENSG00000231098	lncRNA	chr7:133970745-133970805_+	1.51909981297167	0.0389	1.70123186961869	0.0124
A_21_P0005307	ENSG00000233960	lncRNA	chr7:52232958-52233018_-	0.442265214295904	0.0123958	0.690371756629802	0.0914384
A_21_P0005309	ENSG00000228627	lncRNA	chr7:53626938-53626998_-	1.46489913985468	0.063	1.1887766686784	0.3424
A_21_P0005320	ENSG00000236305	lncRNA	chr7:100434935-100434995_-	1.71036912954167	0.0154	1.58343698955986	0.0346
A_21_P0005323	ENSG00000230941	lncRNA	chr7:108962415-108962475_-	1.87917130449015	0.0047	1.44833412657082	0.1171
A_21_P0005378	lnc-ABCA13-1	lncRNA	chr7:48748409-48748469_+	1.18423274330369	0.384	1.01162796679452	0.913034
A_21_P0005463	NONHSAG046749	lncRNA	chr7:1019649-1019919_-	1.26940107828365	0.2514	0.732347118097766	0.1634
A_21_P0005511	ENSG00000232019	lncRNA	chr7:84568799-84568859_-	0.929153175646956	0.4917	0.819488281237812	0.4006
A_21_P0005521	lnc-SRPK2-1	lncRNA	chr7:104653772-104653832_-	1.0129739495842	0.82064	0.675931720507491	0.1531
A_21_P0005552	ENSG00000240990	lncRNA	chr7:27226400-27226460_+	1.16669212582633	0.4047	0.914445879634989	0.5711
A_21_P0005570	lnc-ZKSCAN1-1	lncRNA	chr7:99605743-99605803_+	1.25739363077636	0.2499	0.982938716933471	0.894463
A_21_P0005571	lnc-ZKSCAN1-1	lncRNA	chr7:99597122-99597182_+	1.22446372394239	0.2545	1.00571801669734	0.936797
A_21_P0005573	ENSG00000228742	lncRNA	chr7:106416398-106416458_+	1.17433745139768	0.512656	1.51812242071793	0.0893935
A_21_P0005594	lnc-GNA12-1	lncRNA	chr7:2761535-2761595_-	1.35893992445376	0.242	1.74889640703825	0.018985
A_21_P0005618	ENSG00000261220	lncRNA	chr8:134585886-134585946_+	2.04682842368064	0.00138905	1.23301807582276	0.2493
A_21_P0005621	ENSG00000254319	lncRNA	chr8:2554162-2554222_-	1.31791087203131	0.2041	1.16230826563713	0.3409
A_21_P0005640	lnc-FBXO25-3	lncRNA	chr8:686519-686579_+	1.11579068294312	0.640678	1.2811912776336	0.271623
A_21_P0005689	ENSG00000253181	lncRNA	chr8:37590996-37591056_+	1.19277402437178	0.3339	0.801920788696257	0.356
A_21_P0005703	ENSG00000254775	lncRNA	chr8:60987225-60987285_+	1.74980082206333	0.0082	1.71162914536194	0.0225789
A_21_P0005714	lnc-C8orf34-1	lncRNA	chr8:69901764-69901824_+	1.22227857321497	0.3263	1.00158337557486	0.951602
A_21_P0005785	lnc-ERICH1-5	lncRNA	chr8:1376550-1376610_-	1.58861261023447	0.0274	1.06313403721082	0.5801
A_21_P0005787	lnc-CSMD1-3	lncRNA	chr8:2387226-2387286_-	1.11988289171573	0.4171	1.10192805231493	0.5043
A_21_P0005794	ENSG00000249846	lncRNA	chr3:129831388-129831448_+	1.03417148323262	0.798752	0.82395033579456	0.4152
A_21_P0005822	lnc-TM2D2-2	lncRNA	chr8:38721759-38724162_-	1.33876008579542	0.1388	1.00741489788502	0.953789
A_21_P0005846	lnc-CYP7B1-3	lncRNA	chr8:65309182-65309242_-	1.7909398247979	0.0057	1.37355367562354	0.1344
A_21_P0005869	ENSG00000254180	pseudogene	chr8:91546798-91546855_-	1.60721817109234	0.0332	1.5024279860483	0.0642
A_21_P0005878	ENSG00000253395	lncRNA	chr8:102138289-102138349_-	1.00074841830329	0.966256	0.941394926407703	0.6615
A_21_P0005900	lnc-KIAA0196-2	lncRNA	chr8:125947474-125947534_-	1.21809812000431	0.316	1.41997029009137	0.1106
A_21_P0005915	lnc-SLC45A4-1	lncRNA	chr8:142208042-142208102_-	1.28186334822892	0.2489	1.24807761335125	0.2685
A_21_P0005934	lnc-HMBOX1-1	lncRNA	chr8:28922305-28922365_+	0.75555238991353	0.237	0.995421481703988	0.896637
A_21_P0005976	ENSG00000153317	protein_coding	chr8:131440037-131455734_-	1.39619650123672	0.1486	1.13534712299434	0.436
A_21_P0005985	ENSG00000182973	pseudogene	chr3:32794311-32794775_+	0.718349935636874	0.1769	1.05558338288816	0.825395
A_21_P0006052	lnc-GPR144-1	lncRNA	chr9:127278235-127278295_+	0.606230780902802	0.0587	0.569855941139187	0.0756394
A_21_P0006055	ENSG00000226078	lncRNA	chr9:129292562-129292622_+	1.63086390842706	0.0266	1.50029687150435	0.172273
A_21_P0006071	ENSG00000235494	lncRNA	chr9:99995574-99995634_+	1.35695404737001	0.1661	1.34111059170211	0.248714
A_21_P0006073	ENSG00000224648	lncRNA	chr9:37383207-37383267_-	1.60129753523191	0.0353	1.16064246887951	0.3786
A_21_P0006174	lnc-C9orf79-1	lncRNA	chr9:90491147-90491207_+	1.30657491451183	0.2125	1.43768723995693	0.1022
A_21_P0006183	lnc-HIATL2-1	lncRNA	chr9:97076790-97076850_+\chr9:99705329-99705389_-	1.33250679588886	0.485989	1.17043481230594	0.562421
A_21_P0006193	lnc-STX17-1	lncRNA	chr9:102648913-102648973_+	1.14204424968163	0.390881	2.73425499578891	0.000287544
A_21_P0006242	lnc-PPP1R26-2	lncRNA	chr9:138307103-138307163_+	1.03171205950669	0.968031	0.966963927512131	0.646304
A_21_P0006274	lnc-APBA1-2	lncRNA	chr9:72009224-72009284_-	0.943847166071666	0.6711	0.881729655465278	0.4961
A_21_P0006327	ENSG00000230676	lncRNA	chr9:132208999-132209059_-	1.13513569433153	0.328647	0.925501271792718	0.774767
A_21_P0006334	lnc-QSOX2-1	lncRNA	chr9:139166825-139166885_-	1.27787948122402	0.1849	1.45386153372465	0.0521
A_21_P0006371	ENSG00000261094	lncRNA	chr9:125702515-125702575_+	1.10954175104743	0.530742	0.840624362062897	0.3221
A_21_P0006389	ENSG00000230054	lncRNA	chr9:117418627-117418687_-	1.99072672921033	0.0029	1.38022490045064	0.1327
A_21_P0006395	ENSG00000234771	lncRNA	chr9:130873455-130873989_-	1.12847791891363	0.3833	1.57855784547435	0.0379
A_21_P0006396	ENSG00000234771	lncRNA	chr9:130873945-130874005_-	1.15560463105841	0.332	1.51659225665899	0.0525
A_21_P0006397	ENSG00000175164	pseudogene	chr9:136126398-136126458_-	1.26129420059518	0.2795	1.18518172819992	0.3551
A_21_P0006463	ENSG00000228659	lncRNA	chrX:130173700-130173760_-	1.92655413785536	0.0025	1.29378894022628	0.214583
A_21_P0006511	lnc-HTR2C-1	lncRNA	chrX:113220825-113220885_+	1.53390469519393	0.046	1.00654553344829	0.545617
A_21_P0006520	ENSG00000260081	lncRNA	chrX:152865183-152865243_+	2.92942183434299	0.0121326	1.8178636278129	0.02418
A_21_P0006521	lnc-DHRSX-1	lncRNA	chrX:2484086-2484146_-	2.37233400300758	0.0006	1.19609195890228	0.3774
A_21_P0006522	lnc-ARSD-2	lncRNA	chrX:2742054-2742114_-	1.42441570560606	0.0944	1.22301518151841	0.299457
A_21_P0006537	ENSG00000231774	lncRNA	chrX:70980627-70980687_-\chrX:70940587-70940647_+	1.39860120538415	0.125	1.19418054154867	0.3175
A_21_P0006548	ENSG00000101882	protein_coding	chrX:119070259-119070311_-	1.23642899367955	0.2943	1.58134391335851	0.041
A_21_P0006549	lnc-APLN-1	lncRNA	chrX:128809965-128812135_-	1.46949539624753	0.0321921	1.16166302394294	0.2784
A_21_P0006569	lnc-HTR2C-1	lncRNA	chrX:113220326-113220386_+	1.0248609364051	0.808339	0.687627157980492	0.1044
A_21_P0006584	ENSG00000233382	pseudogene	chrX:119372058-119374102_-	1.22631917461056	0.2392	1.59399376888388	0.0334
A_21_P0006611	lnc-PFKP-11	lncRNA	chr10:3791264-3791324_+	1.28006520840436	0.383431	1.59081682813383	0.0379
A_21_P0006690	ENSG00000224504	lncRNA	chr10:87204543-87204603_+	1.3550295588612	0.1532	0.985494672586254	0.786167
A_21_P0006850	lnc-LYZL1-2	lncRNA	chr10:29524799-29524859_+	1.39965594007564	0.0779	1.75488926130097	0.0127
A_21_P0006903	lnc-BTRC-2	lncRNA	chr10:103044966-103045026_+	1.36266304017875	0.1296	1.28751835732285	0.232
A_21_P0006954	lnc-KLF6-2	lncRNA	chr10:3916355-3916415_-	1.41944712431796	0.0927	1.06311215099869	0.646854
A_21_P0006970	ENSG00000225383	lncRNA	chr10:10828605-10828665_-	1.45426709505436	0.0762	1.13397213959627	0.4016
A_21_P0006974	lnc-C10orf114-6	lncRNA	chr10:21702310-21702370_-	1.08656940493703	0.5957	0.82483942033763	0.403
A_21_P0006976	ENSG00000227932	lncRNA	chr10:26866642-26866702_-\chr10:26953182-26953247_-	2.08048613295422	0.0009	1.9887561725394	0.0026
A_21_P0006998	lnc-ZWINT-1	lncRNA	chr10:57914671-57914731_-	1.22363227876825	0.2984	0.780166124125546	0.2442
A_21_P0007034	lnc-EBF3-4	lncRNA	chr10:131170473-131170533_-	2.71386888896358	0.000395133	1.37347563343655	0.1101
A_21_P0007088	ENSG00000228021	lncRNA	chr10:127389059-127389119_+	1.84506189653986	0.0067	2.468922026655	0.000696766
A_21_P0007089	ENSG00000175470	protein_coding	chr10:133773236-133773296_+	2.0852674911449	0.14838	0.905986009928813	0.459536
A_21_P0007129	ENSG00000245552	lncRNA	chr11:94892195-94892255_+	0.37327925299215	0.0123586	0.688607402937808	0.151847
A_21_P0007137	ENSG00000229671	lncRNA	chr11:1929085-1929145_+	1.23969857084076	0.2346	1.29857482190425	0.1684
A_21_P0007151	ENSG00000237612	lncRNA	chr11:131121648-131121708_+	1.00790121503766	0.808871	1.48078490473088	0.0551
A_21_P0007168	lnc-MUC2-1	lncRNA	chr11:1054394-1054454_+	1.36913892915279	0.134	1.00455913328712	0.860014
A_21_P0007176	lnc-CTR9-5	lncRNA	chr11:10955204-10955264_+	1.04317403862729	0.898534	0.900489805059834	0.5606
A_21_P0007217	lnc-LGALS12-2	lncRNA	chr11:63263015-63263075_+	1.13041081973659	0.4754	0.75069555328082	0.2168
A_21_P0007225	lnc-LRP5-1	lncRNA	chr11:68050281-68050341_+	0.863298964668615	0.4495	0.769012183465499	0.114311
A_21_P0007229	ENSG00000260877	lncRNA	chr11:69187141-69187201_+	3.02125026021632	0.0176234	1.66755564550162	0.0143
A_21_P0007233	ENSG00000254682	lncRNA	chr11:71159776-71159836_+	0.989183629745165	0.938773	1.24418421224021	0.2482
A_21_P0007239	lnc-AQP11-2	lncRNA	chr11:77350929-77350989_+	1.20805194647481	0.3311	0.927131167861869	0.5557
A_21_P0007247	ENSG00000246067	lncRNA	chr11:82784429-82784489_+	1.20520890467972	0.3958	0.96908125328852	0.7208
A_21_P0007248	ENSG00000246067	lncRNA	chr11:82784450-82784489_+	1.14500862700121	0.4577	1.14411100497323	0.250762
A_21_P0007250	ENSG00000246067	lncRNA	chr11:82783778-82783838_+	0.825295705614269	0.177474	0.930499437135131	0.528466
A_21_P0007251	ENSG00000246523	lncRNA	chr11:86711193-86711253_+	1.26472562349314	0.2671	1.39047076802211	0.1505
A_21_P0007309	ENSG00000255344	lncRNA	chr11:134585792-134585852_+	1.41527426704885	0.0895	1.4626883578893	0.0774
A_21_P0007311	ENSG00000226416	lncRNA	chr11:2006186-2006246_-	1.30892073767697	0.2092	1.03022006893681	0.963075
A_21_P0007316	lnc-DENND5A-1	lncRNA	chr11:9142143-9142203_-	1.5510647012968	0.0372	1.43200772457268	0.092
A_21_P0007321	lnc-SOX6-1	lncRNA	chr11:15932526-15932586_-	1.64867744902633	0.0107	1.53480519724255	0.0780833
A_21_P0007376	lnc-LRRC32-6	lncRNA	chr11:76493283-76493343_-	1.71294310195922	0.018	1.00071708639921	0.99537
A_21_P0007382	lnc-GPR83-2	lncRNA	chr11:93932428-93932488_-	1.60179308269671	0.033	1.32013345368759	0.1699
A_21_P0007407	ENSG00000186174	protein_coding	chr11:118789487-118789547_-	1.23587536564831	0.162931	1.12447926358717	0.4194
A_21_P0007429	ENSG00000260196	lncRNA	chr11:17403102-17403162_+	1.57109897301952	0.0379	1.29386194400938	0.1934
A_21_P0007437	ENSG00000250230	lncRNA	chr11:61373397-61373457_+	1.25933763088403	0.2592	0.959527096746399	0.707
A_21_P0007465	lnc-ORAOV1-2	lncRNA	chr11:69290675-69290735_-	1.6995181933244	0.220521	1.06783440560375	0.786026
A_21_P0007477	ENSG00000185847	lncRNA	chr12:111375188-111375248_+	0.78140679569749	0.288521	1.17347352655146	0.385505
A_21_P0007502	ENSG00000196668	lncRNA	chr12:116972086-116972146_+	1.36065430848	0.1257	1.51391055697069	0.0552
A_21_P0007544	ENSG00000257261	lncRNA	chr12:46781650-46781710_+	1.56920848613514	0.150791	1.8782197418259	0.00961896
A_21_P0007566	lnc-NAB2-1	lncRNA	chr12:57482401-57482461_+	0.888341700002824	0.5216	1.6404253138486	0.0326
A_21_P0007619	ENSG00000257193	lncRNA	chr12:104565762-104565814_+	1.40517305726085	0.0996	2.12387875948151	0.0025
A_21_P0007638	ENSG00000258102	lncRNA	chr12:116988321-116988381_+	1.0977264884038	0.449822	0.646505740999902	0.0479
A_21_P0007713	ENSG00000257698	protein_coding	chr12:58325488-58329280_-	0.544126032947555	0.0048	0.464270844931319	0.0031
A_21_P0007715	lnc-CTDSP2-4	lncRNA	chr12:58488740-58488800_-	1.3592291349367	0.133	1.23681548838873	0.269
A_21_P0007761	ENSG00000248594	pseudogene	chr12:112279132-112279192_-	0.82926954858873	0.2696	0.803526179531092	0.3843
A_21_P0007762	ENSG00000234608	lncRNA	chr12:112279301-112279361_-	0.594684471075077	0.0503	0.915232210881572	0.5801
A_21_P0007763	ENSG00000248594	pseudogene	chr12:112277582-112277642_-	0.835019873663663	0.4368	0.868854434360077	0.5223
A_21_P0007825	lnc-DERA-1	lncRNA	chr12:16573923-16573983_+	1.23733782361719	0.2677	1.2524463390118	0.2566
A_21_P0007890	ENSG00000257398	lncRNA	chr12:108239307-108239365_-	0.940033582509733	0.513032	1.6659534000759	0.0278533
A_21_P0007927	ENSG00000230641	lncRNA	chr13:27757071-27757131_+	1.32392576290804	0.1647	1.13708265184474	0.402252
A_21_P0007936	ENSG00000170919	lncRNA	chr13:45918915-45918975_+	1.01213097261941	0.872086	1.02447996795972	0.864166
A_21_P0008031	lnc-SGCG-5	lncRNA	chr13:23508709-23508769_+	1.12507223574245	0.42	0.832892607500544	0.3782
A_21_P0008116	lnc-COL4A2-3	lncRNA	chr13:110459496-110459542_+	1.10509041998916	0.5117	1.23278029493125	0.2267
A_21_P0008130	lnc-SACS-1	lncRNA	chr13:23551653-23551713_-	1.45395696441612	0.0817	1.15099875255215	0.47287
A_21_P0008178	lnc-PCDH9-3	lncRNA	chr13:65214337-65214397_-	1.06843629205971	0.657711	0.821920401993937	0.3784
A_21_P0008215	lnc-COL4A1-1	lncRNA	chr13:110784350-110784410_-	0.880100877521429	0.5199	0.970109632836974	0.702157
A_21_P0008219	lnc-TUBGCP3-6	lncRNA	chr13:112836837-112836897_-	1.57713894643178	0.0418	1.25652482190666	0.292579
A_21_P0008252	lnc-TSC22D1-1	lncRNA	chr13:44974200-44974260_-	1.4503544055822	0.0737	1.54827125958802	0.0391
A_21_P0008254	lnc-LCP1-1	lncRNA	chr13:46688125-46688185_-	1.44707175194742	0.064	1.32325427224685	0.168505
A_21_P0008267	lnc-TUBGCP3-1	lncRNA	chr13:113342676-113342736_-	1.24058322137981	0.235759	1.23986057801154	0.349598
A_21_P0008331	ENSG00000251363	lncRNA	chr14:41431993-41432050_+	1.60030942596821	0.0768	0.641065658934165	0.3435
A_21_P0008476	lnc-TTC7B-2	lncRNA	chr14:90982162-90982222_-	1.16463416863034	0.2621	1.70084024332815	0.0244
A_21_P0008478	lnc-SERPINA12-1	lncRNA	chr14:95024789-95024849_-	1.15238473362615	0.4152	1.85785134437084	0.00797374
A_21_P0008499	lnc-CDCA4-1	lncRNA	chr14:105491401-105491461_-	1.31180794323172	0.2147	0.870362052828865	0.3538
A_21_P0008521	ENSG00000258742	lncRNA	chr14:93358183-93358233_+	0.712186227603176	0.452778	1.19904262750112	0.261225
A_21_P0008544	ENSG00000258819	lncRNA	chr14:77542468-77542528_-	1.05593323742256	0.931849	0.921323129160987	0.707534
A_21_P0008550	lnc-BCL11B-1	lncRNA	chr14:99750983-99751043_-	1.18431132904343	0.2877	1.26945125424781	0.2366
A_21_P0008570	lnc-USP8-2	lncRNA	chr15:50660095-50660155_+	1.6670882577542	0.0238	1.42384263367832	0.0530548
A_21_P0008580	lnc-UACA-2	lncRNA	chr15:70863576-70863636_-	1.06676139537402	0.5983	1.53251157794937	0.0467
A_21_P0008626	ENSG00000247556	protein_coding	chr15:41577458-41577518_+	1.17809589209706	0.3125	1.46113234820409	0.0835
A_21_P0008627	ENSG00000247556	lncRNA	chr15:41598499-41598559_+	0.718805342838274	0.1546	0.921781011850645	0.5528
A_21_P0008647	ENSG00000245750	lncRNA	chr15:69855549-69855609_+	1.70171028962026	0.0273	1.19093976389901	0.2918
A_21_P0008656	lnc-ARID3B-1	lncRNA	chr15:74806252-74806312_+	1.11107385698623	0.4817	0.77786350895741	0.2854
A_21_P0008662	lnc-IL16-2	lncRNA	chr15:81701518-81701578_+	1.46511809938441	0.0673	1.04720955927932	0.67364
A_21_P0008701	ENSG00000259182	lncRNA	chr15:101708835-101709271_+	1.18545706220928	0.4044	0.955854459331282	0.645615
A_21_P0008722	lnc-RASGRP1-5	lncRNA	chr15:38332524-38332584_-	1.54357562501391	0.0421	1.19993356964758	0.2932
A_21_P0008851	lnc-ITGA11-2	lncRNA	chr15:68777344-68777404_-	1.28460928269158	0.2543	1.19423571398749	0.3078
A_21_P0008869	lnc-TM2D3-1	lncRNA	chr15:102149840-102149900_-	1.3153223634101	0.1899	1.48414826257994	0.084
A_21_P0008884	ENSG00000245694	lncRNA	chr16:54954214-54957531_-	1.24543822716679	0.620114	0.906128641243673	0.5707
A_21_P0008917	ENSG00000259888	lncRNA	chr16:24621589-24621649_+	1.33078938413865	0.1683	1.18997114320803	0.411415
A_21_P0008919	lnc-IL4R-1	lncRNA	chr16:27389760-27389820_+	1.2869721892076	0.1654	0.883376117509485	0.5207
A_21_P0008935	ENSG00000261241	lncRNA	chr16:50918596-50918656_+	1.16114291323976	0.3927	1.21153849431868	0.2035
A_21_P0009073	lnc-MPHOSPH6-2	lncRNA	chr16:82578754-82578814_-	1.41247019808814	0.0771	1.49203602346601	0.0427
A_21_P0009075	lnc-ZDHHC7-1	lncRNA	chr16:84983126-84983186_-	1.54823003666407	0.0663	1.23957456469033	0.2423
A_21_P0009079	lnc-GINS2-1	lncRNA	chr16:85723166-85723226_-	1.02984509408439	0.992022	1.01974420947047	0.937296
A_21_P0009093	lnc-CLEC16A-2	lncRNA	chr16:11318438-11318498_+	1.28693032853156	0.2208	0.945785878351507	0.6614
A_21_P0009116	ENSG00000259807	lncRNA	chr16:29231689-29231749_+	1.60950315133033	0.0332	1.1880650435788	0.3323
A_21_P0009118	lnc-C16orf55-1	lncRNA	chr16:89752380-89752440_+	1.03317118627858	0.876855	1.63163125777682	0.101827
A_21_P0009120	ENSG00000262468	lncRNA	chr16:4296267-4296327_-	1.46160417770611	0.0267	1.20090337725774	0.643772
A_21_P0009130	lnc-CMTM4-1	lncRNA	chr16:66585261-66585321_-	1.63204077037681	0.0299	1.12396276626995	0.4018
A_21_P0009155	ENSG00000266086	protein_coding	chr17:56066541-56066601_-	1.78988726226712	0.0163	0.944682538024657	0.651408
A_21_P0009166	ENSG00000225582	lncRNA	chr17:32806887-32806947_+	1.66618457457646	0.0208	1.42601329483076	0.0852
A_21_P0009168	ENSG00000244649	lncRNA	chr17:46784472-46784532_+	1.35666401760378	0.1149	1.11216667328695	0.4659
A_21_P0009193	ENSG00000272763	lncRNA	chr17:46716470-46716530_-	1.64139167320905	0.0192	1.17123605795264	0.358305
A_21_P0009195	lnc-PHB-2	lncRNA	chr17:47556348-47556408_-	1.39660739638841	0.1226	1.31354209669808	0.1708
A_21_P0009229	lnc-KCNJ12-1	lncRNA	chr17:21356680-21356740_+	1.39821073621014	0.1225	1.04697452500518	0.860215
A_21_P0009267	ENSG00000267659	lncRNA	chr17:66638823-66638883_+	1.2733995830351	0.1909	1.86069067844616	0.0073
A_21_P0009271	lnc-GPR142-1	lncRNA	chr17:72377280-72377340_+	1.31845144145747	0.2221	2.28690017457072	0.0138098
A_21_P0009295	lnc-ALOX12B-1	lncRNA	chr17:7967848-7967908_-	1.08715212171345	0.479544	0.932113573006589	0.5892
A_21_P0009319	ENSG00000260833	protein_coding	chr17:36607869-36607909_-	1.23352966532738	0.327	1.10859037859528	0.4802
A_21_P0009320	ENSG00000260833	protein_coding	chr17:36608010-36608070_-	1.24015372079716	0.3312	0.892501283879865	0.5405
A_21_P0009324	lnc-CCR7-1	lncRNA	chr17:38689128-38689188_-	1.20991231369144	0.3447	1.16661134687797	0.252858
A_21_P0009341	ENSG00000261040	protein_coding	chr17:58160929-58160989_-	0.981750870650012	0.916987	1.01287420379014	0.9547
A_21_P0009343	ENSG00000267280	lncRNA	chr17:59470826-59470886_-	0.938524098248768	0.5743	0.823127221196947	0.3454
A_21_P0009367	ENSG00000262223	lncRNA	chr17:79354237-79354297_-	1.39400976378709	0.1177	1.09498862500693	0.5113
A_21_P0009368	ENSG00000262877	lncRNA	chr17:79362044-79362104_-	1.402278768552	0.0941	0.967459994743343	0.814238
A_21_P0009377	ENSG00000169992	protein_coding	chr17:7308627-7308687_+	0.8747917356112	0.3472	1.20112357329255	0.3159
A_21_P0009386	lnc-ATAD5-3	lncRNA	chr17:29070138-29070198_+	3.37541817296532	9.99039e-05	1.6523132364771	0.0187992
A_21_P0009392	ENSG00000263470	lncRNA	chr17:63097383-63098635_+	1.1888326316037	0.4047	1.07415787420581	0.531921
A_21_P0009400	ENSG00000262194	lncRNA	chr17:3705542-3705602_-	0.983825768199039	0.77841	1.1621924593592	0.2849
A_21_P0009450	lnc-LRRC30-1	lncRNA	chr18:7277349-7277409_+	0.988147795487145	0.855059	1.56628326614931	0.0197
A_21_P0009476	lnc-KATNAL2-4	lncRNA	chr18:45194659-45194712_+	1.16362960847196	0.4542	0.892182741308892	0.4237
A_21_P0009481	ENSG00000041353	protein_coding	chr18:52562267-52562327_+	0.766818022060922	0.101369	1.17470227983676	0.575144
A_21_P0009515	ENSG00000259256	lncRNA	chr18:3347859-3347919_-	1.64649785184439	0.0189	1.33571021007776	0.166635
A_21_P0009533	lnc-RP11-863N1.2.1-1	lncRNA	chr18:19929030-19929090_-	1.170796861635	0.3443	1.34753495966536	0.0903
A_21_P0009544	lnc-INO80C-1	lncRNA	chr18:33025516-33025576_-	1.53022259383645	0.0662	1.41432349535624	0.0887819
A_21_P0009551	lnc-RIT2-1	lncRNA	chr18:39766378-39766438_-	1.34821326684939	0.1371	1.52103378350911	0.0538
A_21_P0009590	lnc-MBP-1	lncRNA	chr18:74528064-74528124_-	0.833154976325003	0.4174	0.839319257804101	0.3655
A_21_P0009629	ENSG00000267337	lncRNA	chr18:42098213-42098273_-	1.65916524101248	0.0248	1.36850160251938	0.1285
A_21_P0009642	lnc-PQLC1-1	lncRNA	chr18:77437621-77437681_-	1.22885017914997	0.330377	0.614234752520613	0.0908
A_21_P0009665	ENSG00000232324	lncRNA	chr19:54369265-54369325_+	1.88465127990985	0.0181	1.92143484504096	0.0169344
A_21_P0009685	ENSG00000174695	protein_coding	chr5:82352767-82352827_-	1.08959265822464	0.706183	1.61363489111167	0.0471
A_21_P0009734	ENSG00000272473	lncRNA	chr19:781013-781073_-	2.17254812475558	0.001	1.11713204488898	0.77084
A_21_P0009739	lnc-S1PR2-1	lncRNA	chr19:10349765-10349825_-	1.83682898002699	0.0065	1.38266016252993	0.1103
A_21_P0009758	lnc-C19orf12-1	lncRNA	chr19:30186142-30186277_-\chr19:30186673-30186733_-\chr19:30187468-30188318_-\chr19:30187057-30187564_-	4.90769558470348	8.70957e-05	4.13923074051143	0.000888248
A_21_P0009788	lnc-ZNF793-1	lncRNA	chr19:38041119-38041179_+	0.987743600579919	0.815187	1.64582633993405	0.0238
A_21_P0009795	ENSG00000267183	lncRNA	chr19:56207616-56207664_+	0.975372599998505	0.753235	0.72794701032845	0.127
A_21_P0009798	ENSG00000198131	protein_coding	chr19:58788810-58788870_+	1.51835855665617	0.163953	1.18999441615253	0.3394
A_21_P0009830	ENSG00000229262	lncRNA	chr20:18051592-18051652_+	1.39796033291158	0.1132	1.21522614005641	0.3173
A_21_P0009855	ENSG00000232294	lncRNA	chr20:51293571-51293631_+	1.23748480994772	0.278	1.73043173394926	0.0129
A_21_P0009864	ENSG00000231078	lncRNA	chr20:55682124-55682184_+	1.29743220514868	0.1898	1.14051753022821	0.3927
A_21_P0009873	ENSG00000232442	lncRNA	chr20:62259801-62259861_+	1.08859586364272	0.53386	0.923690467247077	0.749877
A_21_P0009926	lnc-STK35-1	lncRNA	chr20:2181177-2181237_+	1.11968139246886	0.4784	1.12006519245838	0.4536
A_21_P0009950	lnc-SSTR4-2	lncRNA	chr20:23161799-23161853_+	0.76610013591522	0.532191	0.884886344458282	0.4842
A_21_P0009955	lnc-NNAT-1	lncRNA	chr20:36205576-36205636_+	1.03827717546716	0.793431	1.05339301935823	0.798143
A_21_P0009964	ENSG00000234089	lncRNA	chr7:57288991-57289051_-	1.23755045419706	0.2454	0.897467611794365	0.4773
A_21_P0009971	lnc-CEBPB-1	lncRNA	chr20:48788917-48788977_+	1.31062413762894	0.1401	0.944162708808788	0.6317
A_21_P0009984	lnc-C20orf197-3	lncRNA	chr20:58899540-58899600_+	1.10934734612435	0.735249	1.36934949530768	0.667522
A_21_P0009993	ENSG00000232442	lncRNA	chr20:62260102-62260162_+	1.04448063982259	0.590295	0.876319323031149	0.880281
A_21_P0010019	ENSG00000237396	lncRNA	chr20:22569813-22569873_-	1.72182663482093	0.0092	1.14450245236814	0.3804
A_21_P0010023	lnc-CST9LP1-2	lncRNA	chr20:23499277-23499337_-	1.42594783038121	0.0986	1.28995114389945	0.1484
A_21_P0010051	lnc-PREX1-3	lncRNA	chr20:47101929-47102186_-\chr7:57289219-57289269_+\chr20:47100419-47100479_-	1.35239069668089	0.1541	1.29944154017744	0.15
A_21_P0010079	lnc-C20orf196-2	lncRNA	chr20:5479041-5479101_+	1.38701984959437	0.1731	2.35387343438395	0.00283958
A_21_P0010088	ENSG00000269549	protein_coding	chr20:44077003-44077063_+	1.27535870219711	0.2429	0.945080461224024	0.6815
A_21_P0010094	lnc-ARFGEF2-2	lncRNA	chr20:46462478-46751347_-\chr20:47104487-47104547_+	1.83526854391273	0.0084	1.16051727203813	0.3448
A_21_P0010098	lnc-C20orf166-2	lncRNA	chr20:61198441-61198501_+	1.28289461902614	0.1958	1.28681791197777	0.1907
A_21_P0010132	ENSG00000224930	lncRNA	chr21:46419128-46419188_-	1.13563176472294	0.463169	1.49694915223759	0.0297
A_21_P0010141	ENSG00000215386	lncRNA	chr21:17860152-17860212_+	1.70079384946576	0.0167	1.1751584646943	0.473921
A_21_P0010238	ENSG00000205670	pseudogene	chr21:35779989-35780049_+	1.19326588654356	0.403	1.05429255492042	0.607096
A_21_P0010256	ENSG00000160194	pseudogene	chr21:44299782-44299831_+	1.23902433207858	0.2123	1.11241790738453	0.4633
A_21_P0010267	lnc-GPR39-10	lncRNA	chr2:133013205-133013265_+\chr21:9827506-9827566_-	0.73903721131575	0.1562	1.63027411762761	0.0148
A_21_P0010287	lnc-RSPH1-4	lncRNA	chr21:44071814-44071874_-	1.3170200857752	0.1856	0.934348394462037	0.5592
A_21_P0010303	NONHSAG033064	lncRNA	chr21:46475930-46475990_-	1.52146147604674	0.054	1.65476917937488	0.0246
A_21_P0010313	lnc-MX1-3	lncRNA	chr21:43137402-43137462_+	1.46748823165386	0.0656	1.55341955978665	0.0339
A_21_P0010328	ENSG00000237476	lncRNA	chr22:21318787-21318847_+	0.914877491846589	0.361712	1.40578125324423	0.225445
A_21_P0010333	lnc-CLDN5-1	lncRNA	chr22:19543519-19543579_-	1.37596696939817	0.125	1.18477783095335	0.366
A_21_P0010343	ENSG00000236611	lncRNA	chr22:23670616-23670676_+	1.13256003896804	0.4632	1.11106516514312	0.4911
A_21_P0010348	ENSG00000244625	lncRNA	chr22:27130347-27130407_+	1.47486534896063	0.0758	1.45663446724343	0.0837
A_21_P0010366	ENSG00000234869	lncRNA	chr22:46943845-46943905_+	1.05186294435318	0.795016	1.0014484999944	0.753541
A_21_P0010382	ENSG00000237316	lncRNA	chr22:35108864-35109888_-	1.45902201295441	0.0767422	1.82753814433756	0.0109
A_21_P0010384	ENSG00000232363	lncRNA	chr22:45831748-45831808_-	1.03293760157281	0.89841	1.70431315866197	0.0157816
A_21_P0010388	ENSG00000238192	lncRNA	chr22:48536667-48536727_-	1.4476551666069	0.0771	1.08717058610522	0.435
A_21_P0010394	ENSG00000099917	protein_coding	chr22:20855025-20855084_+	1.31222691534374	0.1424	0.894667469237983	0.558
A_21_P0010415	ENSG00000223695	lncRNA	chr22:36784633-36784693_+	1.5437511507928	0.048	1.29143434385809	0.2155
A_21_P0010421	lnc-PPARA-2	lncRNA	chr22:46539336-46539396_+	1.48942293909888	0.0522	1.2090220930369	0.3233
A_21_P0010443	lnc-RPL3-1	lncRNA	chr22:39686547-39686607_-	1.8465650195517	0.008	1.20644228440754	0.2885
A_21_P0010455	lnc-C22orf26-5	lncRNA	chr22:46531014-46531074_-	1.1887163850344	0.3783	0.926749323947805	0.6184
A_21_P0010462	ENSG00000187905	pseudogene	chr22:21403110-21403170_+	1.27283302572119	0.2508	1.09643536267496	0.511616
A_21_P0010501	ENSG00000123407	Poorly Annotated	chr12:54350158-54350218_-	1.47013012114636	0.0887	1.1819183899919	0.379565
A_21_P0010514	ENSG00000173531	protein_coding	chr3:49722518-49722578_-	1.37313203665117	0.1564	0.927252264246611	0.4766
A_21_P0010519	ENSG00000173531	protein_coding	chr3:49722790-49722850_-	0.837262376566557	0.3968	0.97480584735823	0.900364
A_21_P0010520	ENSG00000186715	pseudogene	chr1:17084588-17084648_-	0.907965079251118	0.489308	0.715323363058483	0.1743
A_21_P0010525	ENSG00000235912	pseudogene	chr5:172083411-172083602_-\chr1:27976174-27976234_+	0.591719140833156	0.0334	0.506676067887572	0.0091
A_21_P0010536	ENSG00000117226	protein_coding	chr1:89521700-89521760_-\chr1:89476588-89476648_-	0.92515304791475	0.261032	1.01587183040509	0.730569
A_21_P0010545	ENSG00000224699	lncRNA	chr1:110958809-110958869_+	1.89032494197962	0.0038	1.14085842537437	0.418312
A_21_P0010557	ENSG00000178104	protein_coding	chr1:144868035-144868095_-	1.48123822776582	0.0559	0.814306097343113	0.1837
A_21_P0010565	ENSG00000102172	protein_coding	chrX:22012831-22012891_+	0.440368426166919	0.0009	0.370811852125011	0.0001
A_21_P0010575	ENSG00000228106	lncRNA	chr1:223010557-223010617_+	0.500248698548584	0.0132	0.716425384092246	0.112922
A_21_P0010578	ENSG00000120555	pseudogene	chr7:45796496-45796556_-\chr10:38679757-38679817_-	1.88981729154624	0.00388601	1.91937903198227	0.0105
A_21_P0010595	ENSG00000147364	protein_coding	chr8:385643-385703_+	0.57537919527093	0.016757	0.809032370189265	0.445448
A_21_P0010596	ENSG00000237330	protein_coding	chr1:1006365-1006425_-	1.32877981121223	0.1583	0.891340761888458	0.3575
A_21_P0010599	ENSG00000273059	Poorly Annotated	chr1:147484458-147484518_-	1.31628828019142	0.1767	0.91604389094909	0.5834
A_21_P0010617	ENSG00000219102	pseudogene	chr1:113992878-113992924_+\chr1:54441091-54441151_-	1.19552739086118	0.262756	0.82121438143998	0.275642
A_21_P0010655	ENSG00000224631	pseudogene	chr16:61089545-61089607_-	0.516931642014099	0.0186	0.637042625408397	0.1024
A_21_P0010660	ENSG00000230207	pseudogene	chr1:171652690-171652746_-\chr9:7477437-7477493_-	0.470650083576179	0.0061	0.478580901316359	0.0029
A_21_P0010663	ENSG00000260938	Poorly Annotated	chr1:178459183-178459243_-	1.21318634136157	0.2995	0.855686879238129	0.4532
A_21_P0010692	ENSG00000173531	protein_coding	chr3:49723732-49723792_-	0.792925886038346	0.2178	0.958061420348406	0.717608
A_21_P0010693	ENSG00000173531	protein_coding	chr3:49723096-49723157_-	1.24679443898841	0.3361	0.894724444882677	0.5348
A_21_P0010695	ENSG00000218510	lncRNA	chr1:22357650-22357710_+	0.937457856087579	0.669199	1.06302529453669	0.759027
A_21_P0010740	ENSG00000228106	lncRNA	chr1:223010335-223010395_+	0.562100965844807	0.0237	0.810271140904396	0.2969
A_21_P0010755	ENSG00000164068	protein_coding	chr3:49728868-49728929_+	0.890885665985142	0.42536	1.17010033552754	0.3523
A_21_P0010771	ENSG00000242676	pseudogene	chr1:142726956-142729910_-	1.30486236081398	0.630655	1.02091160833326	0.699387
A_21_P0010844	ENSG00000232139	lncRNA	chr10:120124658-120124718_+	1.35093895036523	0.1818	1.02341825139	0.917668
A_21_P0010854	ENSG00000215267	pseudogene	chr10:5324774-5324834_-	1.61951678936001	0.0244	1.14683640094442	0.415768
A_21_P0010857	ENSG00000226705	pseudogene	chrX:40749983-40750035_-\chr10:6335136-6335196_-\chr8:70856442-70856494_+	0.94829168644127	0.579916	1.01222828352723	0.997828
A_21_P0010885	ENSG00000137210	protein_coding	chr6:10756740-10756799_+	0.595027566844614	0.0518	1.0241272519659	0.986201
A_21_P0010886	ENSG00000223482	lncRNA	chr10:89048198-89048244_-\chr10:81526026-81526072_-	1.14273736649681	0.324859	1.30989620057879	0.2048
A_21_P0010888	ENSG00000226381	lncRNA	chr10:81451473-81451533_-	1.32085092312821	0.168393	2.05877584246059	0.0026
A_21_P0010889	ENSG00000223482	lncRNA	chr10:89048197-89048230_-	1.13820132292592	0.330034	1.34245287931594	0.1591
A_21_P0010891	ENSG00000223482	lncRNA	chr10:89047754-89047814_-	1.35534490889857	0.278683	1.4458940190259	0.0802
A_21_P0010893	ENSG00000225484	lncRNA	chr10:81565793-81565837_-\chr10:81429287-81429331_+	1.44074077145144	0.0798	1.45917210290386	0.0732
A_21_P0010899	ENSG00000237169	pseudogene	chr10:99069332-99069392_-	0.482182236919807	0.012	0.484228856142136	0.00406532
A_21_P0010927	ENSG00000224851	lncRNA	chr10:92821856-92821916_+	1.40281972071603	0.1003	1.09055133774822	0.55339
A_21_P0010949	ENSG00000223482	lncRNA	chr10:89046677-89046737_-	1.4939831591109	0.0704508	1.48976741905259	0.0587
A_21_P0010950	ENSG00000225484	lncRNA	chr10:81564207-81564267_-\chr10:81430862-81430922_+	1.58207162350808	0.0320166	1.61843669423113	0.0312
A_21_P0010952	ENSG00000225484	lncRNA	chr10:81426553-81426610_+\chr10:81568518-81568575_-	1.3737784958369	0.1135	1.37938229500152	0.0914
A_21_P0010978	ENSG00000245532	lncRNA	chr11:65194122-65194182_+	1.12377458725552	0.706987	0.440083370747186	0.0374806
A_21_P0010979	ENSG00000173727	protein_coding	chr11:65222946-65223006_+	3.02135226603179	0.000185719	1.84041121152806	0.0135
A_21_P0010980	ENSG00000251562	lncRNA	chr11:65272645-65272705_+	1.19478106047027	0.3505	0.718151748250126	0.123
A_21_P0010981	ENSG00000251562	lncRNA	chr11:65267041-65267101_+	0.739603884008258	0.22	0.370762948151493	0.000426513
A_21_P0010982	ENSG00000251562	lncRNA	chr11:65268618-65268678_+	1.35227488190785	0.1684	0.894794871302237	0.4846
A_21_P0010986	ENSG00000213365	pseudogene	chr15:35385141-35385200_+\chr11:71991980-71992040_+	0.790580972650139	0.2784	0.807320310319945	0.3516
A_21_P0010997	ENSG00000250303	pseudogene	chr11:112162364-112162424_+	4.12908068379771	0.000695485	2.38784367837677	0.0418361
A_21_P0011001	ENSG00000160613	protein_coding	chr11:117076593-117076653_-	0.93870850432888	0.5752	0.888688768052843	0.365413
A_21_P0011010	ENSG00000255042	pseudogene	chr11:50246895-50247139_-	1.12962542931297	0.4316	1.40860698602297	0.1124
A_21_P0011014	ENSG00000156239	protein_coding	chr21:30248747-30248807_-	1.14280950294401	0.3775	1.13942480894017	0.57698
A_21_P0011015	ENSG00000235505	pseudogene	chr11:104777703-104777734_-	1.05420342586857	0.672111	0.950820184293979	0.783425
A_21_P0011016	ENSG00000235505	pseudogene	chr11:104776254-104777733_-	1.07363339915694	0.6069	0.932252512853417	0.618893
A_21_P0011021	ENSG00000223756	pseudogene	chr11:3405402-3405462_+	1.24557717954277	0.224183	0.93436060887107	0.721223
A_21_P0011024	ENSG00000245532	lncRNA	chr11:65192167-65192227_+	1.74036990257962	0.0451124	0.925573168021731	0.735639
A_21_P0011028	ENSG00000255414	lncRNA	chr11:123330741-123330801_+	1.30222280623456	0.1446	1.27591723404286	0.1985
A_21_P0011036	ENSG00000256594	pseudogene	chr12:9809581-9809641_+	1.34050185806038	0.46198	1.33603408276677	0.1505
A_21_P0011047	ENSG00000151846	protein_coding	chr13:25671479-25671517_+	0.837563437109939	0.4359	0.680141441559991	0.1196
A_21_P0011052	ENSG00000239473	pseudogene	chr5:165455861-165455897_-\chr12:80423092-80423152_+	0.342047676502687	0.0004	0.568481812931904	0.0300736
A_21_P0011065	ENSG00000134996	protein_coding	chr9:77752474-77752534_+	1.10252619327119	0.551	1.31833310510195	0.1734
A_21_P0011068	ENSG00000256546	protein_coding	chr12:122506335-122506395_+	1.22653710802266	0.3351	1.12405694472895	0.4232
A_21_P0011086	ENSG00000177359	pseudogene	chr12:31265154-31265213_-\chr12:9728247-9728306_+	0.956421154088767	0.656329	0.743727375193979	0.2255
A_21_P0011089	ENSG00000177359	pseudogene	chr12:31265911-31265971_-\chr12:9727488-9727548_+	1.17135879396882	0.4287	0.938452226404291	0.6549
A_21_P0011106	ENSG00000204583	lncRNA	chr12:133181286-133181346_-	1.05992799482825	0.745305	0.973569169606634	0.857711
A_21_P0011116	ENSG00000141965	protein_coding	chr19:4793334-4793394_+	1.37827317764458	0.1419	1.29454896726662	0.1897
A_21_P0011119	ENSG00000102699	protein_coding	chr13:25016012-25016072_-	2.43564720382927	0.00612488	1.71791669585117	0.0122
A_21_P0011126	ENSG00000153989	protein_coding	chr6:118030805-118030865_+	0.722407872724123	0.1794	1.07276585502415	0.796897
A_21_P0011128	ENSG00000234627	pseudogene	chr13:24903101-24903161_+\chr13:23490553-23490613_+\chrX:47372052-47372112_-	1.33935575847071	0.1191	1.56405733675695	0.0492
A_21_P0011135	ENSG00000161960	protein_coding	chr17:7481745-7481805_+	0.596908078831405	0.0572	0.558964070049375	0.0177
A_21_P0011141	ENSG00000233725	Poorly Annotated	chr13:44561474-44561534_+	1.44360413384768	0.08	1.2944465445228	0.193
A_21_P0011142	ENSG00000187109	protein_coding	chr12:76446984-76447034_-	0.488995394733368	0.0185	0.487688994686989	0.0033
A_21_P0011146	ENSG00000120948	protein_coding	chr1:11083453-11083513_+	0.838331720742587	0.148714	0.800175332469234	0.3118
A_21_P0011149	ENSG00000219926	Poorly Annotated	chr13:64413153-64413213_+\chr13:64411689-64412224_+	1.14233989882227	0.4442	1.16019968148912	0.3759
A_21_P0011150	lnc-FBXL3-1	Poorly Annotated	chr13:77564628-77564688_+	0.760407109176766	0.1796	1.02909636589355	0.80813
A_21_P0011183	ENSG00000243406	pseudogene	chr13:52741795-52741855_-	1.37194241065883	0.1335	1.781428610873	0.007
A_21_P0011184	ENSG00000217576	pseudogene	chr13:41486633-41486691_-\chr13:52744104-52744164_-	0.589458472898757	0.047	1.10713763105962	0.48379
A_21_P0011189	ENSG00000170144	protein_coding	chr2:178084358-178084417_+	0.683530540876546	0.1593	0.84655984334484	0.240573
A_21_P0011235	ENSG00000226921	lncRNA	chr13:114583671-114583731_-	1.26490854345514	0.2562	0.999269438608228	0.926788
A_21_P0011263	ENSG00000258704	protein_coding	chr14:35438362-35438410_-	2.73902065839827	0.000661543	2.8367056977036	0.000107589
A_21_P0011264	ENSG00000258704	protein_coding	chr14:35433159-35433219_-	3.20636688543485	0.000246558	2.32860181704077	0.00130195
A_21_P0011271	ENSG00000213935	pseudogene	chr7:4905076-4905136_-\chr14:77352723-77352783_-	0.362348623230328	0.00368812	0.511268714316226	0.031489
A_21_P0011303	ENSG00000261377	pseudogene	chr15:29035269-29035314_+	0.698576293133382	0.1589	0.66394482678177	0.066
A_21_P0011306	ENSG00000108639	protein_coding	chr17:76168212-76168272_+	0.867311863864171	0.4462	1.22766040081597	0.2747
A_21_P0011314	ENSG00000259330	lncRNA	chr15:40618587-40618647_+	0.87462818335916	0.3833	0.897809481225105	0.5011
A_21_P0011315	ENSG00000259330	lncRNA	chr15:40618783-40618843_+	0.832659690274188	0.3061	0.914767192149294	0.5671
A_21_P0011326	ENSG00000255346	protein_coding	chr15:69355018-69355078_+	1.48762134035897	0.0629	1.39203401090714	0.1023
A_21_P0011330	ENSG00000173546	protein_coding	chr15:75983046-75983106_-	1.10520849973917	0.525789	1.0870775959014	0.630038
A_21_P0011332	ENSG00000260139	pseudogene	chr15:78193704-78193764_+	1.79355578581063	0.022	1.21442634326014	0.1907
A_21_P0011350	ENSG00000170248	protein_coding	chr3:33885678-33885715_+	1.25535562798581	0.151379	1.47370119927268	0.0813
A_21_P0011354	lnc-APBA2-1	Poorly Annotated	chr15:29004630-29004690_+\chr15:23186542-23186602_-	0.757934889830655	0.2103	1.31631894651043	0.085
A_21_P0011364	ENSG00000187667	pseudogene	chr15:28996681-28996741_+\chr15:30776752-30776812_+\chr15:23194791-23194851_-\chr15:32815306-32815366_-	1.05525232689694	0.700635	1.08874568889851	0.583958
A_21_P0011370	ENSG00000215252	pseudogene	chr15:34837598-34839166_-	0.544001894186711	0.0103477	0.443048554773394	0.00200704
A_21_P0011372	ENSG00000245849	protein_coding	chr15:40986785-40986845_-	0.827853830418922	0.3407	1.50224231408149	0.0349
A_21_P0011373	ENSG00000245849	protein_coding	chr15:40986061-40986121_-	0.7162720862499	0.1986	0.721268758223009	0.1169
A_21_P0011376	ENSG00000156508	protein_coding	chr6:74227330-74227389_-	0.272730516879596	0.000525776	0.289258617635028	0.00295293
A_21_P0011382	ENSG00000259206	pseudogene	chr15:82712198-82712258_+\chr15:85070033-85070093_-\chr15:83088723-83088783_+	1.08916681162344	0.618507	0.958381386298922	0.583741
A_21_P0011397	ENSG00000223509	pseudogene	chr15:32820736-32820796_-\chr15:28991231-28991291_+	0.928659034102815	0.497	1.56303396443833	0.0618
A_21_P0011400	ENSG00000256802	lncRNA	chr15:29971307-29971367_+	1.37206466463191	0.1362	1.24910270355806	0.2173
A_21_P0011406	ENSG00000259363	protein_coding	chr15:100379121-100379181_+	1.1983135090471	0.343	1.03830604954788	0.625656
A_21_P0011411	ENSG00000140367	protein_coding	chr15:76171444-76171494_+	0.808017310640022	0.258489	1.01613777554552	0.980245
A_21_P0011413	ENSG00000130656	protein_coding	chr16:204351-204411_+	0.817199111225082	0.2987	0.656372465591782	0.0691
A_21_P0011414	ENSG00000238098	Poorly Annotated	chr16:2461187-2461247_+	1.57670274359407	0.0459	1.20770870881461	0.2884
A_21_P0011433	ENSG00000185825	protein_coding	chrX:152966167-152966227_-	0.849393003371539	0.3369	0.76881985558901	0.2586
A_21_P0011439	ENSG00000069329	protein_coding	chr16:46705675-46705735_-	1.20044846356922	0.2959	1.38658841542225	0.1083
A_21_P0011448	ENSG00000261567	Poorly Annotated	chr16:85391488-85391548_+	1.2571029259076	0.2843	0.898327769405824	0.5117
A_21_P0011458	ENSG00000005187	Poorly Annotated	chr16:20737628-20737688_-	1.29522313416335	0.2188	1.32373072030585	0.1703
A_21_P0011476	ENSG00000183765	protein_coding	chr22:29091183-29091708_-	1.18098846953862	0.3612	0.830373756112472	0.257
A_21_P0011479	ENSG00000185825	protein_coding	chrX:152965931-152965990_-	0.795078966883942	0.2329	0.850673346049404	0.4349
A_21_P0011480	ENSG00000260047	pseudogene	chr16:32882416-32883301_+\chr16:33792020-33792905_-	0.970292088462319	0.661891	0.989905798501493	0.962147
A_21_P0011486	ENSG00000246379	lncRNA	chr16:56223414-56223474_-	1.46280349043605	0.0772	1.10416373884765	0.71936
A_21_P0011491	ENSG00000063177	protein_coding	chr19:49118593-49118653_-	0.368464945459773	0.001	0.33865035813937	0.000521294
A_21_P0011514	ENSG00000214819	protein_coding	chr17:14139021-14139081_-\chr17:20484133-20484193_+	1.55033018865379	0.0158	1.48584547391896	0.0615306
A_21_P0011522	ENSG00000228983	pseudogene	chr17:19499137-19499197_+	1.29815784798408	0.1969	0.867921956553898	0.4075
A_21_P0011526	ENSG00000170160	protein_coding	chr17:16638050-16638110_+	1.26037545055714	0.366594	1.69181361980583	0.223098
A_21_P0011529	ENSG00000108443	protein_coding	chr17:58011595-58011828_+	1.50679489107235	0.0503	1.29705631823123	0.2066
A_21_P0011549	ENSG00000267023	Poorly Annotated	chr17:66132517-66132577_+	1.4109537163736	0.1242	1.25798322731763	0.2012
A_21_P0011551	ENSG00000171634	protein_coding	chr17:65822408-65822454_+	1.29494674281971	0.2023	0.972595987257687	0.757732
A_21_P0011552	ENSG00000237560	lncRNA	chr17:67957888-67957948_+	1.52530764637278	0.0208	1.22423204521865	0.3114
A_21_P0011562	ENSG00000261888	Poorly Annotated	chr17:81060090-81060150_+	0.91042859640298	0.5124	1.62817739531867	0.0170016
A_21_P0011566	NONHSAG020594	lncRNA	chr17:4704421-4704481_-	1.46335046869938	0.0694	0.976994380015532	0.750815
A_21_P0011573	ENSG00000235979	lncRNA	chr17:19364016-19364076_-	0.987244093869474	0.914877	1.53384001416731	0.0479
A_21_P0011576	ENSG00000169062	protein_coding	chr13:115067240-115067300_+	0.913962726982659	0.819209	0.912359894036135	0.5745
A_21_P0011577	ENSG00000083312	protein_coding	chr5:72201240-72201274_+	1.36483109037617	0.1391	1.57128124071711	0.0285
A_21_P0011580	ENSG00000227685	lncRNA	chr17:20516360-20516420_-	1.0340942736796	0.896828	1.69663376716377	0.0118828
A_21_P0011589	ENSG00000187595	protein_coding	chr17:40186248-40186308_-	1.34500441764961	0.1557	1.10089991517025	0.5251
A_21_P0011600	ENSG00000099821	protein_coding	chr19:617457-617606_-	0.767226047641443	0.2639	0.680080512783451	0.0989
A_21_P0011602	ENSG00000170832	protein_coding	chr17:58291981-58292041_-	1.92466559400939	0.00739353	1.59050087956189	0.0483471
A_21_P0011603	ENSG00000196704	protein_coding	chr17:66247243-66247303_+	0.743489634868892	0.142	0.667552628964466	0.08
A_21_P0011605	ENSG00000214174	pseudogene	chr17:62969026-62969400_-	0.769296212263328	0.2177	0.635922443001805	0.0513
A_21_P0011611	ENSG00000187775	protein_coding	chr17:76482065-76482125_-	1.99068520068608	0.0037	1.5298563714324	0.0634
A_21_P0011619	ENSG00000266433	pseudogene	chr17:25758573-25758633_+	1.82471446393602	0.0141	1.26986780873222	0.24062
A_21_P0011620	ENSG00000214719	pseudogene	chr17:29351387-29351444_+\chr17:28937899-28937955_+	1.03695112067732	0.781422	1.07055750540468	0.524966
A_21_P0011623	ENSG00000251665	lncRNA	chr17:49025059-49025119_+	1.73735444463337	0.0083	1.13945440425691	0.400156
A_21_P0011625	lnc-KPNA2-1	lncRNA	chr17:66131968-66132028_+	0.749560208481336	0.1271	0.570159162756973	0.0099
A_21_P0011675	ENSG00000102144	protein_coding	chrX:77378775-77378835_+	0.905762222263122	0.4139	1.153615509811	0.3895
A_21_P0011678	ENSG00000062485	protein_coding	chr12:56665627-56665687_-	1.05312532284863	0.57364	0.964004586535608	0.836505
A_21_P0011681	ENSG00000237440	protein_coding	chr19:20735324-20735850_-	0.837492472120364	0.239775	0.541642795909071	0.0147
A_21_P0011684	ENSG00000183850	Poorly Annotated	chr19:23281009-23281069_+	1.23506604678281	0.2955	0.952592783481217	0.610384
A_21_P0011694	ENSG00000226686	lncRNA	chr19:36806872-36806932_-\chr19:37753483-37753543_+	1.15173237501363	0.338016	0.840128267725848	0.280837
A_21_P0011696	ENSG00000226686	lncRNA	chr19:37756378-37756438_+\chr19:36803973-36804033_-	1.60683434861288	0.0158	1.36818051549017	0.126782
A_21_P0011702	ENSG00000105366	protein_coding	chr19:51631248-51631291_+\chr19:51957925-51957985_-	1.26323144495687	0.1624	1.61713624862163	0.039
A_21_P0011706	ENSG00000182310	protein_coding	chr19:52208351-52208411_+	1.54805389540101	0.0735	0.987187950104416	0.972817
A_21_P0011712	ENSG00000218175	pseudogene	chr19:54279027-54279087_+\chr1:241161800-241161919_-\chr2:177065690-177065804_-	0.407025412222161	0.0023	0.500682933398899	0.0045
A_21_P0011713	ENSG00000225370	pseudogene	chr19:55184056-55184116_+	1.38380291210648	0.1395	1.99570795605455	0.0039
A_21_P0011714	ENSG00000244482	protein_coding	chr19:54745458-54745518_-	1.32814641552963	0.1426	1.21422210186638	0.2077
A_21_P0011724	ENSG00000267453	pseudogene	chr19:15962876-15962936_-	1.55611534203234	0.022	1.33065313878024	0.1291
A_21_P0011739	ENSG00000248830	pseudogene	chr19:35035831-35035891_-	1.53132325830021	0.0391	1.45062877708886	0.0884
A_21_P0011743	ENSG00000232677	lncRNA	chr19:36811083-36811143_-	1.71158885840363	0.0139	1.03031770495511	0.891855
A_21_P0011745	ENSG00000232677	lncRNA	chr19:36822345-36822398_-	1.45343394346948	0.0738	1.2264467781509	0.2492
A_21_P0011753	ENSG00000204933	pseudogene	chr19:43882791-43882851_-	1.78557315899243	0.0440026	1.59359637293206	0.0403
A_21_P0011766	ENSG00000176593	Poorly Annotated	chr19:58522003-58522063_-	1.40215261969725	0.0763	2.12687448530985	0.0015
A_21_P0011770	ENSG00000226686	lncRNA	chr19:37754264-37754324_+\chr19:36806091-36806151_-	1.65159872111998	0.0197	1.84478969964914	0.0151918
A_21_P0011772	ENSG00000161640	protein_coding	chr19:50462796-50462856_-	1.05068668574357	0.915546	1.61330627356902	0.0247
A_21_P0011774	ENSG00000188051	protein_coding	chr19:17555959-17556019_-	1.18105168418025	0.579292	1.72105064397421	0.0099
A_21_P0011791	ENSG00000229727	lncRNA	chr2:7569515-7569575_+	2.00903175202448	0.0023	2.16568570021483	0.0144713
A_21_P0011796	ENSG00000187999	pseudogene	chr2:33861940-33862000_+\chr6:32293368-32293428_+\chr4:78909539-78909599_-	0.495628641384055	0.00306756	0.4527209807075	0.0012
A_21_P0011802	ENSG00000116062	protein_coding	chr2:47935382-47935442_+	1.41958198911629	0.1051	1.3627578617917	0.1468
A_21_P0011806	ENSG00000239779	protein_coding	chr2:74687461-74687521_+	1.26634083308582	0.2577	0.97494810676636	0.737167
A_21_P0011808	ENSG00000135976	protein_coding	chr2:96542203-96542260_-\chr2:97890542-97890599_+	0.670633918158345	0.0681966	0.543800644252098	0.0116
A_21_P0011809	ENSG00000230006	pseudogene	chr2:89103891-89103951_+	0.98191621075861	0.897972	0.838197920547353	0.2966
A_21_P0011812	ENSG00000135976	protein_coding	chr2:97915323-97915383_+	1.78499123498157	0.135104	1.80612106698184	0.0284137
A_21_P0011813	ENSG00000132406	protein_coding	chr4:4237575-4237635_-	0.44208728184407	0.00232469	0.670149957230398	0.0752
A_21_P0011816	ENSG00000143061	protein_coding	chr1:117146336-117146396_-	1.36458020375762	0.1133	1.5133727716128	0.0602
A_21_P0011822	ENSG00000228486	lncRNA	chr2:98287930-98287990_+	1.15719303704358	0.3358	1.87239416796288	0.00914057
A_21_P0011831	NONHSAG028743	lncRNA	chr2:102603719-102603779_+	1.67359900562336	0.168149	1.05963026044278	0.873217
A_21_P0011841	ENSG00000007168	protein_coding	chr17:2585156-2585216_+	1.42327125733251	0.1071	1.15176349531587	0.4373
A_21_P0011842	ENSG00000124802	protein_coding	chr6:8097626-8097685_-	0.577757552990931	0.0427	1.12521171546976	0.597901
A_21_P0011848	lnc-PROC-1	lncRNA	chr2:128146911-128146971_+	0.516833993845398	0.0151591	0.601394733226101	0.0485283
A_21_P0011851	ENSG00000119729	protein_coding	chr2:46809122-46809182_+	1.11193880652368	0.625315	1.08856176269441	0.616073
A_21_P0011867	ENSG00000187653	pseudogene	chr4:91759821-91759871_-	0.585688018738868	0.0234	0.719430700164634	0.1341
A_21_P0011873	ENSG00000072195	protein_coding	chr2:220362984-220363044_+	1.23328509991442	0.3337	0.937915519103531	0.564476
A_21_P0011880	ENSG00000224376	protein_coding	chr2:232259627-232259687_+	0.970688808975162	0.948604	1.75823272194335	0.0095
A_21_P0011881	ENSG00000224376	protein_coding	chr2:232259631-232259691_+	1.01552228715099	0.861516	1.45493128443468	0.0486
A_21_P0011906	ENSG00000231948	lncRNA	chr2:20792192-20792252_-	1.1351469503184	0.550186	1.75223470253885	0.08431
A_21_P0011914	ENSG00000224058	pseudogene	chr2:47958513-47958573_-	0.869508743403139	0.4352	1.29400265826955	0.1709
A_21_P0011915	ENSG00000175029	protein_coding	chr10:126677053-126677100_-	1.02183783662047	0.756093	0.854208021930154	0.3969
A_21_P0011923	ENSG00000143951	pseudogene	chr2:64040762-64040822_-	1.62636458995837	0.0228	1.05141241274729	0.743572
A_21_P0011928	ENSG00000089220	protein_coding	chr12:118582414-118582474_+	0.794504927960807	0.3353	0.623395872789859	0.0387
A_21_P0011931	ENSG00000055609	protein_coding	chr7:151921189-151921249_-	1.62875145048959	0.0183	0.976950132186905	0.6832
A_21_P0011934	ENSG00000230606	lncRNA	chr2:96479800-96479860_-\chr2:98088773-98088832_-	0.724713383203929	0.0931	0.480070073230203	0.0057
A_21_P0011938	ENSG00000135976	protein_coding	chr2:97788634-97788694_+\chr2:96648039-96648099_-	0.6499925088267	0.0585	0.527324013062336	0.0081
A_21_P0011939	ENSG00000230606	lncRNA	chr2:98088542-98088602_-	0.800620061782255	0.20523	0.448805175373666	0.0024
A_21_P0011968	ENSG00000204434	Poorly Annotated	chr2:132384485-132384604_-	1.31305435831056	0.1952	1.66881034531367	0.0224
A_21_P0012002	ENSG00000237442	pseudogene	chr2:41383783-41383843_+	0.702567365098447	0.1392	0.737634943635538	0.1927
A_21_P0012070	ENSG00000238012	lncRNA	chr2:64557619-64557679_-	1.21572200493543	0.2283	0.788124705468214	0.2218
A_21_P0012077	ENSG00000172965	lncRNA	chr2:112125062-112125115_-\chr2:87882813-87882866_+	1.27593859800319	0.473183	1.99588545145335	0.055512
A_21_P0012078	ENSG00000172965	lncRNA	chr2:87882801-87882861_+\chr2:112125067-112125127_-	1.44078625101934	0.307691	1.15924727212289	0.781062
A_21_P0012079	ENSG00000172965	lncRNA	chr2:87820977-87821037_+\chr2:112186885-112186945_-	1.1200355627255	0.772886	0.879233736276029	0.470553
A_21_P0012080	ENSG00000172965	lncRNA	chr2:112237484-112237544_-\chr2:87769762-87769822_+	1.3335539184027	0.19801	0.859411657814382	0.2793
A_21_P0012105	ENSG00000229150	pseudogene	chr2:208973109-208973169_-	1.02780516585943	0.910428	1.4914447529487	0.069049
A_21_P0012112	ENSG00000214612	pseudogene	chr20:18485440-18485738_+	0.397421746830132	0.0018	0.488593156356513	0.0256779
A_21_P0012116	ENSG00000250090	pseudogene	chr20:25816680-25817366_-\chr12:37969490-37969532_+	1.48965062426707	0.0518	0.975313801664135	0.92419
A_21_P0012148	lnc-GDAP1L1-1	lncRNA	chr20:42852270-42852330_+	1.3347643429019	0.1593	0.870634088987018	0.4962
A_21_P0012174	ENSG00000213449	pseudogene	chr21:30595040-30595100_+\chr10:93427070-93427130_-	1.65757793905513	0.0171	2.40937893316071	0.0005
A_21_P0012200	ENSG00000176054	pseudogene	chr21:30369969-30370029_-\chr6:39926185-39926371_-	0.370718273572412	0.0009	0.494802382107465	0.0114947
A_21_P0012235	lnc-C21orf58-1	lncRNA	chr21:47874911-47874971_-	0.981987300741147	0.794811	0.733111499389828	0.1825
A_21_P0012237	ENSG00000103194	protein_coding	chr16:84801925-84801963_+	0.789704956737796	0.126571	0.625090312631689	0.0286718
A_21_P0012239	ENSG00000055609	protein_coding	chr7:152132710-152132774_-	1.31513923749236	0.1675	1.20277262715421	0.3031
A_21_P0012245	ENSG00000271985	pseudogene	chr10:81286205-81286344_-	1.35099239565336	0.0855	0.944253031358035	0.647591
A_21_P0012248	ENSG00000237517	lncRNA	chr22:19001919-19001979_+	1.06116072928757	0.682854	1.02220561703999	0.907251
A_21_P0012250	ENSG00000226287	pseudogene	chr22:21057392-21057797_+	1.06098048022696	0.83954	0.722347742753287	0.1109
A_21_P0012252	ENSG00000198033	protein_coding	chr13:19748030-19748088_-	1.46962760379661	0.1748	1.2744943596237	0.1887
A_21_P0012258	ENSG00000002822	protein_coding	chr7:1855780-1855840_-	0.824081069964518	0.250501	1.41742661320968	0.316507
A_21_P0012264	ENSG00000100058	pseudogene	chr22:25844170-25844230_+	1.34429926576406	0.1956	1.25815649514401	0.319109
A_21_P0012274	ENSG00000206195	pseudogene	chr22:16192906-16192966_-	1.26935360458801	0.1473	1.35704120807495	0.119505
A_21_P0012285	lnc-PI4KA-3	lncRNA	chr22:20958929-20958989_-	1.6038569286141	0.0298	1.53812495054659	0.0403
A_21_P0012294	ENSG00000100031	protein_coding	chr22:25023866-25023927_+\chr22:22989271-22989332_+	1.1231021048904	0.537117	1.83205370904323	0.0152834
A_21_P0012298	ENSG00000233080	Poorly Annotated	chr22:35590615-35590675_-	0.860775412194189	0.4808	1.29651491208647	0.2237
A_21_P0012316	ENSG00000206176	lncRNA	chr22:20379802-20379859_+	1.05227546941397	0.850907	0.757464684568067	0.2279
A_21_P0012327	ENSG00000206195	lncRNA	chr22:16186148-16186208_-\chr14:19918475-19918535_-\chr14:19656826-19656886_+	1.7708086205574	0.0107	1.34904664536948	0.1204
A_21_P0012338	ENSG00000241973	protein_coding	chr22:21062043-21062103_-	0.729437697117473	0.202	0.724515354328812	0.1712
A_21_P0012339	ENSG00000183506	pseudogene	chr22:20386650-20387193_-\chr22:21830424-21830967_-	0.83280817944433	0.3843	0.739081384960807	0.206
A_21_P0012340	ENSG00000241973	protein_coding	chr22:21064220-21064280_-	0.876329982046073	0.5134	0.730559306862976	0.2142
A_21_P0012341	ENSG00000241973	protein_coding	chr22:21065129-21065643_-	0.975734721246767	0.898455	0.804660793652639	0.3417
A_21_P0012398	ENSG00000232829	pseudogene	chr3:130547068-130547128_+	1.27685355621804	0.20339	3.49099574026632	0.000208774
A_21_P0012407	ENSG00000104131	protein_coding	chr15:44853308-44853367_+	0.574008567719356	0.0135	0.613315701187521	0.0377
A_21_P0012445	lnc-RYBP-4	lncRNA	chr3:72146568-72146628_-	0.941011699839178	0.706281	1.00669501538846	0.832315
A_21_P0012454	ENSG00000239455	pseudogene	chr3:106825013-106825073_-	0.991910205679563	0.920242	1.24999453667538	0.2568
A_21_P0012461	lnc-C3orf25-2	lncRNA	chr3:129107882-129107942_-	1.116170717419	0.437654	1.57341244539412	0.332539
A_21_P0012477	ENSG00000238043	Poorly Annotated	chr3:193719455-193719515_-	1.39230551855465	0.1019	1.17889053063899	0.3602
A_21_P0012502	ENSG00000242104	lncRNA	chr3:141439852-141439912_+	0.514670404405376	0.0839603	1.00523823698994	0.897716
A_21_P0012505	ENSG00000241143	pseudogene	chr3:149868503-149868563_+	1.04504000491631	0.819983	1.02540388795452	0.807987
A_21_P0012537	ENSG00000230067	pseudogene	chr3:36810257-36810317_-	1.06067735515094	0.6378	1.14710621164006	0.3901
A_21_P0012540	ENSG00000163637	protein_coding	chr3:64430157-64430217_-	1.2580739590128	0.2477	1.22856510389256	0.2566
A_21_P0012555	ENSG00000240033	lncRNA	chr3:166553462-166553520_-	1.24383269299963	0.3693	0.966652571902219	0.769207
A_21_P0012583	ENSG00000247810	lncRNA	chr4:37110875-37110952_+	0.862438139281352	0.4428	0.807900933515172	0.3262
A_21_P0012605	ENSG00000143702	protein_coding	chr1:243349366-243349612_-	1.65558964150577	0.0173	2.10433020269149	0.0015
A_21_P0012616	ENSG00000248307	Poorly Annotated	chr4:138972482-138972518_+	1.22513287668259	0.2543	1.59845360641954	0.0419
A_21_P0012646	ENSG00000117592	protein_coding	chr1:173456918-173456977_+	1.58544585052345	0.0449	1.54164933188341	0.0516
A_21_P0012654	ENSG00000255495	lncRNA	chr8:12052933-12053446_+	0.974412693219598	0.808013	0.909057427564013	0.667817
A_21_P0012673	ENSG00000165688	protein_coding	chr9:139313500-139313560_+	0.76130317920679	0.3032	0.803234873214601	0.237573
A_21_P0012674	ENSG00000248161	lncRNA	chr4:103339903-103339963_-	5.48574529846683	0.000100544	29.3221538757019	6.4041e-05
A_21_P0012781	ENSG00000248161	lncRNA	chr4:103339873-103339933_-	6.83751219939502	6.46814e-05	24.2972129165882	6.4041e-05
A_21_P0012826	ENSG00000166971	protein_coding	chr16:53525656-53525716_-	1.55301187077128	0.033	1.678684994052	0.0249
A_21_P0012835	ENSG00000113296	Poorly Annotated	chr5:79315836-79315896_+	1.14411987682113	0.2736	1.56818018300928	0.0354
A_21_P0012845	ENSG00000159111	protein_coding	chr17:45903999-45904052_-	0.485495802195317	0.0093	0.741386559081623	0.1613
A_21_P0012880	ENSG00000028310	protein_coding	chr5:880098-880158_-	1.52303067633616	0.0495	1.53830244277515	0.0473
A_21_P0012884	ENSG00000188002	pseudogene	chr5:1599221-1599281_-	0.647721767911517	0.0844	0.887086945581851	0.500845
A_21_P0012887	ENSG00000188002	pseudogene	chr5:1630625-1630682_-	1.37798606148938	0.131	1.65162892561084	0.029
A_21_P0012918	ENSG00000119335	protein_coding	chr9:131456193-131456974_+	0.649425571308308	0.0511	0.55147219891921	0.0132
A_21_P0012927	ENSG00000164241	protein_coding	chr5:126394572-126394629_-	1.71588121862536	0.012	1.53590499469377	0.0285693
A_21_P0012940	ENSG00000188850	pseudogene	chr5:43348740-43348800_+	0.329260580559441	0.000347102	0.358819444804977	0.00302338
A_21_P0012967	ENSG00000248103	lncRNA	chr5:180710530-180710590_+	0.953986688959568	0.531383	1.40077539154436	0.0753
A_21_P0012979	ENSG00000215158	pseudogene	chr5:34164948-34165008_-	0.455649541226679	0.0048	0.492454582165306	0.0033
A_21_P0013000	ENSG00000247627	pseudogene	chr5:134262444-134262504_-\chr5:99384784-99384844_-	0.640258638216119	0.0601	0.654857252968345	0.0507
A_21_P0013005	ENSG00000223539	pseudogene	chr5:135078176-135078236_-	0.557626269845177	0.0177	0.83155629474876	0.3481
A_21_P0013007	ENSG00000248596	lncRNA	chr5:175600434-175600494_-	2.12572688886798	0.0100551	1.75903103012241	0.0827634
A_21_P0013023	lnc-RAB44-2	lncRNA	chr6:36700061-36700121_+	0.162747108348391	7.30067e-05	0.445890801574571	0.0174595
A_21_P0013035	ENSG00000257103	protein_coding	chr19:34710407-34710467_+	1.35728307110051	0.2161	1.18289214468551	0.405871
A_21_P0013060	ENSG00000175581	protein_coding	chr11:73575363-73575423_+	0.474973412193976	0.0052	0.679276745639459	0.0984
A_21_P0013065	ENSG00000229700	pseudogene	chr6:20043000-20043060_-	0.613008541677403	0.0595	0.802821360026982	0.3082
A_21_P0013078	ENSG00000225851	pseudogene	chr6:31349698-31349758_-	0.576699073955977	0.0289	0.419457127293986	0.0006
A_21_P0013085	ENSG00000230910	lncRNA	chr6:69339850-69339910_-	1.27942079248841	0.1992	0.818727659195525	0.3752
A_21_P0013088	ENSG00000213080	pseudogene	chr5:43207269-43207329_+\chr1:160865246-160865306_+\chr6:71318499-71318559_-	0.468074291731203	0.000682037	0.448274161273198	0.0015
A_21_P0013089	ENSG00000220563	pseudogene	chr6:86368750-86368810_-	1.17507589000881	0.35262	1.64675672450885	0.0215
A_21_P0013100	ENSG00000134717	protein_coding	chr1:52530573-52530610_+	0.697064170799908	0.1105	1.33279321609594	0.1634
A_21_P0013130	ENSG00000204344	protein_coding	chr6:31949162-31949222_+	0.920602593301852	0.6001	0.81174113561474	0.3908
A_21_P0013136	ENSG00000233342	lncRNA	chr6:161347520-161347580_+	1.45284171957504	0.0566	1.27675192021174	0.2273
A_21_P0013145	ENSG00000231776	lncRNA	chr6:85130854-85130914_-	1.33414475693967	0.1412	0.750763967677962	0.141
A_21_P0013166	ENSG00000248767	lncRNA	chr7:334325-334385_+	1.22453040008634	0.2991	1.40872714197421	0.1071
A_21_P0013192	ENSG00000229897	pseudogene	chr9:101370367-101370426_+\chr7:152065697-152065757_+	0.898314392455252	0.541848	1.07601102438305	0.530187
A_21_P0013202	ENSG00000237572	pseudogene	chr7:62672074-62672134_+\chr11:50149492-50149552_+	1.31004306365649	0.1881	1.58574980427885	0.0333
A_21_P0013232	ENSG00000149262	protein_coding	chr11:77612469-77612529_-	0.794973863579991	0.2919	1.09688757310965	0.806476
A_21_P0013234	ENSG00000146731	protein_coding	chr7:56128077-56128136_+	0.691356341124535	0.1024	0.810098346025841	0.355
A_21_P0013239	ENSG00000219039	pseudogene	chr7:75465239-75465299_+	0.486906209066074	0.0054	0.518046093320518	0.007
A_21_P0013243	ENSG00000091073	protein_coding	chr7:76132743-76132804_+	1.24102922178056	0.3308	0.947922137944402	0.831419
A_21_P0013245	ENSG00000091073	protein_coding	chr7:76129781-76129841_+	0.94009512453108	0.630755	1.1666590209922	0.326459
A_21_P0013248	ENSG00000091073	protein_coding	chr7:76129795-76129842_+	1.13724121848117	0.50821	1.01283097207917	0.893885
A_21_P0013268	ENSG00000146872	protein_coding	chr17:60558521-60558567_+	1.02738002578804	0.959826	0.755134806467891	0.1844
A_21_P0013269	ENSG00000146872	protein_coding	chr17:60558528-60585789_+	1.16875572458696	0.359437	0.847208525299187	0.3438
A_21_P0013278	ENSG00000196456	pseudogene	chr7:150107805-150107865_+	0.747398647286263	0.29139	0.338065287933604	9.67019e-05
A_21_P0013292	ENSG00000106682	protein_coding	chr7:73611288-73611348_+	1.13655443803329	0.745338	1.05683612067308	0.602166
A_21_P0013293	ENSG00000225264	pseudogene	chr7:29638444-29638504_-	1.31696843629986	0.1735	1.18175335069027	0.3835
A_21_P0013298	ENSG00000214765	pseudogene	chr7:45763986-45764046_-	0.895268597663457	0.3811	1.10691163022165	0.62131
A_21_P0013300	ENSG00000122545	protein_coding	chr7:35937851-35937911_+	1.11892165411058	0.4668	1.05935569026476	0.615203
A_21_P0013303	ENSG00000241007	pseudogene	chr7:152065232-152065284_+	1.12822003831284	0.4428	1.1605955184813	0.3975
A_21_P0013307	ENSG00000228303	pseudogene	chr7:56718265-56718325_-	0.883342678979916	0.5052	0.944637298406923	0.6685
A_21_P0013320	ENSG00000169902	Poorly Annotated	chr7:65849652-65849712_-	1.3066652952045	0.2304	0.979243330122756	0.805104
A_21_P0013324	ENSG00000223473	lncRNA	chr7:65957236-65957296_-	1.17201875060719	0.400186	1.09542550519556	0.875035
A_21_P0013327	ENSG00000154710	protein_coding	chr7:66240302-66240363_+	1.38042206239284	0.1377	1.6295813216822	0.0257
A_21_P0013339	ENSG00000122674	protein_coding	chr7:5940528-5940563_+\chr7:6863719-6863754_-	1.38473193118663	0.0761	1.6809507442363	0.0116
A_21_P0013340	ENSG00000122674	protein_coding	chr7:5940807-5940867_+	1.06595104543822	0.592045	0.715693625381949	0.1445
A_21_P0013341	ENSG00000122674	protein_coding	chr7:5940239-5940299_+	1.48864983596273	0.0452	2.27480858731321	0.0005
A_21_P0013343	ENSG00000122674	protein_coding	chr7:6864362-6864422_-\chr7:5939860-5939920_+	1.22642782087429	0.2225	1.35262760033425	0.0972
A_21_P0013349	ENSG00000128591	protein_coding	chr7:128498537-128498597_+	1.22551823713445	0.3124	0.977544527703903	0.912498
A_21_P0013373	ENSG00000226097	lncRNA	chr7:20351250-20351310_+	1.58785884563849	0.0192	1.8252485894235	0.00809094
A_21_P0013386	ENSG00000149262	protein_coding	chr11:77602773-77602833_-	0.832884705848806	0.4011	0.882536075017201	0.5558
A_21_P0013410	ENSG00000236734	pseudogene	chr7:2514359-2514419_-	2.17720681424181	0.0046	1.94655271337896	0.0063
A_21_P0013421	ENSG00000214765	pseudogene	chr7:45791123-45791163_-	1.0937661295816	0.689548	1.65527014278777	0.0181
A_21_P0013422	ENSG00000214765	pseudogene	chr7:45767856-45767914_-	0.999584200514789	0.965359	1.09697809026919	0.4956
A_21_P0013432	ENSG00000227910	pseudogene	chr7:63385225-63385285_-	1.59839892704133	0.0383	1.10019846399459	0.498184
A_21_P0013441	ENSG00000154710	protein_coding	chr7:66270302-66270362_+	1.46037783800854	0.1013	1.51308622123042	0.0523
A_21_P0013457	ENSG00000234722	lncRNA	chr7:153097022-153097082_-	0.912524756610685	0.5854	0.853216960137767	0.368
A_21_P0013465	ENSG00000254269	lncRNA	chr8:1054909-1054969_+	1.10831829488457	0.65524	2.00201487265675	0.0023
A_21_P0013475	ENSG00000251470	pseudogene	chr8:47610170-47610230_+	1.2958876922971	0.2335	1.10403857332873	0.527682
A_21_P0013477	ENSG00000224594	pseudogene	chr8:49297226-49297286_+	0.573352747374426	0.0496	0.745394352365006	0.2244
A_21_P0013514	ENSG00000248498	Poorly Annotated	chr8:47505121-47505181_-	1.58858459378498	0.221987	1.16208256572537	0.302575
A_21_P0013516	ENSG00000215311	pseudogene	chr7:149031380-149031440_+\chr6:70415715-70415774_-\chr8:57014181-57014241_-	0.69908135832591	0.1308	0.602725544415838	0.0362
A_21_P0013517	ENSG00000122378	protein_coding	chr10:82191925-82191985_+	0.727439260722329	0.1303	0.716590196810366	0.1164
A_21_P0013523	ENSG00000253738	lncRNA	chr8:92081806-92081866_-	0.870980320262595	0.4558	1.07257833529305	0.626207
A_21_P0013527	ENSG00000253948	lncRNA	chr8:100025118-100025178_-	1.76147164506168	0.0181	1.86919138793908	0.0105
A_21_P0013528	ENSG00000253948	lncRNA	chr8:100025096-100025156_-	1.81294668429705	0.0165	2.16324177699093	0.0021
A_21_P0013556	ENSG00000056050	protein_coding	chr4:170652845-170652905_-	0.829524870233059	0.3694	1.39406185177848	0.1316
A_21_P0013557	ENSG00000215237	pseudogene	chr9:15011719-15011761_+	0.735955825001353	0.1942	1.63008987272218	0.0387
A_21_P0013558	ENSG00000088247	protein_coding	chr19:6413887-6413948_-	0.897804059576758	0.5158	0.71386191237076	0.1683
A_21_P0013564	ENSG00000106714	protein_coding	chr9:39103760-39103820_-\chr9:43890386-43890446_+	0.846307060556897	0.506763	0.648359090793256	0.0433871
A_21_P0013565	ENSG00000154529	protein_coding	chr9:43890465-43890525_+	0.859585179415356	0.507052	0.6337576727785	0.0370964
A_21_P0013579	ENSG00000233178	lncRNA	chr9:71014033-71014093_-	1.66450928595358	0.0234185	1.67848047714069	0.167292
A_21_P0013630	ENSG00000106714	protein_coding	chr9:39266888-39266948_-\chr9:43709704-43709764_+	1.1604838247865	0.543769	0.821042520677205	0.2826
A_21_P0013655	ENSG00000215548	pseudogene	chr9:68429069-68429126_-	0.720320238114694	0.1366	0.896301892952199	0.5981
A_21_P0013656	ENSG00000109536	protein_coding	chr4:190878524-190878583_+\chr20:29628197-29628257_+	1.02501600467519	0.810391	0.972447698162533	0.982293
A_21_P0013662	ENSG00000106211	protein_coding	chr7:75933450-75933510_+	0.810655780698316	0.1404	0.582676376225208	0.0241
A_21_P0013670	lnc-PTCH1-1	lncRNA	chr9:98173736-98173782_-	1.45578187751635	0.0791	1.02416724095864	0.80845
A_21_P0013671	lnc-PTCH1-1	lncRNA	chr9:98172823-98172883_-	1.05647592598677	0.5658	1.09619533570712	0.5087
A_21_P0013685	ENSG00000232905	pseudogene	chr9:116613074-116613134_-	0.874875827086673	0.4624	0.959554225284801	0.731906
A_21_P0013687	ENSG00000225361	lncRNA	chr9:138354516-138354576_-	0.771393083407392	0.2204	1.13096054732951	0.420467
A_21_P0013704	ENSG00000228142	lncRNA	chr9:98412459-98412519_+	1.05933827983266	0.668517	0.917198339261418	0.607639
A_21_P0013714	ENSG00000227835	pseudogene	chr9:2943521-2943581_-	1.38838221959999	0.1569	1.12787057467472	0.4453
A_21_P0013717	ENSG00000231909	pseudogene	chr9:19461157-19461217_-	1.26423462617574	0.352381	1.22748434142804	0.2524
A_21_P0013728	ENSG00000109536	protein_coding	chr4:190878569-190878629_+\chr20:29628243-29628303_+	0.8098597573182	0.3042	0.878552454908025	0.5651
A_21_P0013729	ENSG00000215548	pseudogene	chr9:68429072-68429117_-	0.686056931496668	0.0933	0.865076827327999	0.5284
A_21_P0013753	ENSG00000183878	Poorly Annotated	chrY:15399259-15399319_+	0.9382755326555	0.5009	2.15023729903967	0.004
A_21_P0013756	ENSG00000233243	pseudogene	chrX:27882375-27882435_+	0.868873156140447	0.4395	0.814165991237572	0.3842
A_21_P0013757	ENSG00000087086	protein_coding	chr19:49470070-49470130_+	0.754559936470005	0.2145	0.520778217252232	0.0132
A_21_P0013760	ENSG00000168802	protein_coding	chr16:69152027-69152087_-	0.782494147678058	0.2832	0.745359468378718	0.2144
A_21_P0013769	ENSG00000120705	protein_coding	chr5:137844373-137844433_-	1.15313055509845	0.4329	1.1549133190972	0.3157
A_21_P0013771	ENSG00000230590	Poorly Annotated	chrX:73228003-73228063_+	1.40962414033586	0.1165	1.21299500233178	0.2927
A_21_P0013781	ENSG00000196440	Poorly Annotated	chrX:100779090-100779150_+	1.49626932368987	0.0939	1.118192030622	0.491
A_21_P0013791	ENSG00000232177	pseudogene	chrX:125607189-125607249_+	0.909138698939707	0.4409	0.777918971557497	0.22
A_21_P0013802	ENSG00000185973	protein_coding	chrX:154720999-154721059_-	1.72413186114738	0.0332757	1.27839617413409	0.1866
A_21_P0013805	ENSG00000205664	protein_coding	chrX:3735695-3735755_-	1.03469201748818	0.798443	0.870541369706009	0.4365
A_21_P0013806	ENSG00000138029	protein_coding	chr2:26502924-26502983_+	1.13573372090561	0.4816	1.19386766595726	0.3263
A_21_P0013814	ENSG00000229620	pseudogene	chrX:48239553-48239613_-\chrX:48274729-48274789_+	1.25934363700145	0.256662	2.33927633304711	0.0004
A_21_P0013817	ENSG00000224208	pseudogene	chrX:70534908-70534968_-	0.941601707895558	0.6437	1.43556323411072	0.1032
A_21_P0013820	ENSG00000182670	protein_coding	chr21:38575105-38575161_+	0.821309286534133	0.3161	0.698654436394947	0.1546
A_21_P0013825	ENSG00000040341	protein_coding	chr8:74464300-74464360_-	1.22531860478623	0.2944	1.59564040522528	0.0375
A_21_P0013830	ENSG00000270251	Poorly Annotated	chrX:120152184-120152244_-	1.46252536095826	0.0692	1.35052587525626	0.1348
A_21_P0013834	ENSG00000226907	protein_coding	chrX:134928713-134928773_-\chrX:134963231-134963291_-	2.60821125763639	0.00376881	1.75150348001802	0.0146833
A_21_P0013846	ENSG00000204272	lncRNA	chrX:56843750-56843810_+	0.538226058146554	0.03	0.642671793947137	0.0458
A_21_P0013854	ENSG00000234062	pseudogene	chrX:136103657-136103717_+	1.61580025711007	0.748907	0.949728437121475	0.719424
A_21_P0013865	ENSG00000215113	lncRNA	chrX:70986994-70987054_+\chrX:70882844-70882904_-\chrX:70934220-70934280_-	1.13853414256151	0.4971	0.810546421202531	0.3533
A_21_P0013877	ENSG00000225840	Poorly Annotated	chrY:10036619-10036679_+	0.576894090310351	0.0331	1.02097392628151	0.986095
A_21_P0013888	ENSG00000132958	protein_coding	chr13:19997149-19997209_-	1.36741484002637	0.1278	1.77050570431906	0.0075
A_21_P0013893	ENSG00000225840	pseudogene	chrY:10036181-10036241_-	0.924441419165415	0.579951	1.8567251825356	0.00414345
A_21_P0013894	lnc-TSPY10-14	Poorly Annotated	chrY:10035806-10036168_-	0.872244194792888	0.4218	1.73957958595923	0.0075
A_21_P0013909	ENSG00000109536	protein_coding	chr4:190876204-190876263_+\chr20:29625884-29625941_+	0.752586866131749	0.2146	0.908495495526216	0.6062
A_21_P0013921	ENSG00000225294	pseudogene	chr1:27312671-27312731_-	0.817674175114043	0.3649	0.954889745329243	0.6312
A_21_P0013923	ENSG00000233114	pseudogene	chr1:46570765-46570825_+	0.758814716111238	0.2599	1.14957530998888	0.4309
A_21_P0013924	ENSG00000227667	pseudogene	chr1:162949340-162949400_-	0.762572473595531	0.2393	1.170732147241	0.3573
A_21_P0013930	ENSG00000035141	protein_coding	chr2:70524435-70524480_-	0.835608620243257	0.4386	0.739388619498089	0.1871
A_21_P0013932	ENSG00000243317	protein_coding	chr7:135358850-135358910_+	0.960849286290942	0.7137	1.18817829116617	0.3307
A_21_P0013934	ENSG00000233962	Poorly Annotated	chr7:57712463-57712523_+	1.31156990856055	0.2135	1.17747549889768	0.337
A_21_P0013952	ENSG00000167281	protein_coding	chr17:77478618-77478678_-	0.959549517243158	0.630207	1.51634057898872	0.0314646
A_21_P0013961	ENSG00000230000	protein_coding	chr7:62858672-62858732_-\chr7:62810137-62810197_+	1.35008096328266	0.123	1.74341416271388	0.0112
A_21_P0013977	ENSG00000126226	pseudogene	chr13:113842239-113842299_-	0.969979428239822	0.784746	0.811648812129585	0.3645
A_21_P0013984	ENSG00000162433	protein_coding	chr1:65691797-65691857_+	1.42746279547825	0.0721	1.02258384508387	0.690947
A_21_P0013996	ENSG00000131002	pseudogene	chrY:21755963-21756023_+	0.46884810015645	0.00463272	0.66095459233202	0.0796401
A_21_P0014001	ENSG00000248092	lncRNA	chr5:43602907-43602967_-	1.84476501401047	0.0064	0.966650316548739	0.770487
A_21_P0014008	ENSG00000181315	protein_coding	chr6:26637597-26637657_-	0.975678495522828	0.925571	0.982781196350893	0.874123
A_21_P0014012	ENSG00000261359	protein_coding	chr16:31214654-31214714_+	1.58158250287605	0.0325	1.02628009025562	0.952552
A_21_P0014023	ENSG00000235044	pseudogene	chr20:36158816-36158883_+	0.990288265604989	0.963315	0.795966010249384	0.2778
A_21_P0014048	ENSG00000163060	protein_coding	chr2:95542454-95542514_+	1.14522947833476	0.4463	1.08668930882759	0.4531
A_21_P0014051	ENSG00000237037	lncRNA	chr22:42533150-42533210_+\chr22:42520994-42521054_+	0.426248185777855	0.0150054	0.7547620079165	0.312091
A_21_P0014061	lnc-ANGPTL1-1	lncRNA	chr1:178463548-178463608_-	1.30643047977725	0.372097	1.14297221141422	0.3437
A_21_P0014071	ENSG00000261716	lncRNA	chr1:149816146-149816206_-	1.24462059620226	0.231	0.864707278618893	0.647674
A_21_P0014077	ENSG00000232093	lncRNA	chr1:155017712-155017772_-	1.41038122128849	0.1387	1.45832703448213	0.0695
A_21_P0014094	ENSG00000119042	Poorly Annotated	chr2:200325917-200325977_+	2.74558863509512	0.000364393	5.35506458232063	6.7243e-05
A_21_P0014102	ENSG00000224152	lncRNA	chr2:160473502-160473562_+	0.989498117496575	0.798742	0.757833747606931	0.114799
A_21_P0014103	ENSG00000232788	lncRNA	chr2:173328992-173329052_-	1.5721640367607	0.08413	1.79685595676003	0.0082
A_21_P0014115	ENSG00000203644	pseudogene	chr3:129565916-129565976_-	0.503527170402558	0.0033	0.475324577251685	0.00316555
A_21_P0014119	ENSG00000239213	lncRNA	chr3:136561074-136561134_-	1.39976226894731	0.256408	0.841855062388165	0.83838
A_21_P0014120	lnc-MRPS22-1	lncRNA	chr3:139163386-139163446_+	1.38329188507568	0.222	1.51871645100269	0.0532
A_21_P0014134	ENSG00000072840	protein_coding	chr4:5830667-5830727_+	1.11489905794944	0.4412	1.51004851479028	0.114663
A_21_P0014157	ENSG00000112033	Poorly Annotated	chr6:35324560-35324620_+	0.979979492114662	0.661024	1.17779705067051	0.3282
A_21_P0014162	ENSG00000234753	lncRNA	chr6:41491635-41491695_-	1.89987708611775	0.0163305	0.956664416837779	0.839717
A_21_P0014172	ENSG00000158406	protein_coding	chr6:26281285-26281345_-	0.952263771824432	0.521563	0.492825638323475	0.0033
A_21_P0014192	ENSG00000055130	Poorly Annotated	chr7:148497496-148497556_-	1.28354976878504	0.2328	1.14606702571548	0.4099
A_21_P0014195	ENSG00000105856	Poorly Annotated	chr7:106815429-106815489_+	1.1413504175978	0.978097	0.992852158748107	0.835853
A_21_P0014214	lnc-TMEM75-3	lncRNA	chr8:128219698-128219758_-	1.09065648772291	0.5992	0.970060038534605	0.740386
A_21_P0014231	ENSG00000234705	lncRNA	chr9:131425499-131425559_-	0.743968254705753	0.1319	0.782049008598011	0.0987563
A_21_P0014256	ENSG00000165752	protein_coding	chr10:134143806-134143866_-	0.917714595252273	0.463894	1.02817876295274	0.873107
A_21_P0014274	ENSG00000255284	protein_coding	chr11:784094-784154_+	1.45475058371448	0.1049	1.1825914982647	0.227677
A_21_P0014276	ENSG00000255108	lncRNA	chr11:823657-823717_-	1.05660730034177	0.624226	1.09355124419998	0.4537
A_21_P0014279	ENSG00000256092	lncRNA	chr12:123850244-123850304_+	1.30905287142012	0.2223	1.25409857662614	0.246
A_21_P0014280	ENSG00000151948	Poorly Annotated	chr12:129329043-129329103_-\chr12:129330296-129330464_-	1.59589560756815	0.0183	1.43336623278033	0.0751
A_21_P0014285	ENSG00000249550	lncRNA	chr12:114183633-114183693_-	1.27348382372194	0.2216	0.952598928204621	0.7109
A_21_P0014288	ENSG00000088448	Poorly Annotated	chr13:111552447-111552507_-	2.2181579893692	0.00213064	1.56263297404956	0.0385
A_21_P0014295	ENSG00000225973	lncRNA	chr15:55609875-55609935_-	0.846776674013117	0.3194	1.42041927518084	0.1281
A_21_P0014306	ENSG00000103326	pseudogene	chr16:589801-589861_+	0.732268145987658	0.0939	1.17078834532165	0.560997
A_21_P0014312	ENSG00000260260	lncRNA	chr16:2204802-2204862_-	0.909457678579886	0.4407	0.808610101542533	0.282258
A_21_P0014314	ENSG00000263072	lncRNA	chr16:3181668-3181728_-	0.913864484045363	0.508862	1.47602515126387	0.126389
A_21_P0014317	ENSG00000263244	lncRNA	chr16:9206971-9207031_+	0.696961215278264	0.1545	0.449966345838791	0.0017
A_21_P0014321	ENSG00000260442	lncRNA	chr16:28890278-28890338_-	1.0437967999599	0.709135	0.851627995301685	0.3867
A_21_P0014324	lnc-ZNF843-2	lncRNA	chr16:31463746-31463784_-	1.32661071957454	0.1355	1.37215350213444	0.136984
A_21_P0014329	ENSG00000070770	protein_coding	chr16:58193494-58193554_-	1.32342654028213	0.1306	1.911787038981	0.0045
A_21_P0014348	lnc-KPNA2-1	lncRNA	chr17:66125325-66125385_+	1.04326903636525	0.963213	1.36265275420718	0.330148
A_21_P0014350	ENSG00000264920	lncRNA	chr17:45968826-45968886_-	0.923680674186516	0.534685	1.43904511236639	0.0564
A_21_P0014355	ENSG00000263574	lncRNA	chr17:71747409-71747469_+	1.45678071274151	0.0466359	1.4379406148051	0.0889
A_21_P0014357	ENSG00000173818	pseudogene	chr17:78392330-78392390_+	0.85773794617902	0.224188	0.629955035399538	0.0756631
A_21_P0014358	ENSG00000262877	lncRNA	chr17:79361927-79361987_-	1.06889238552654	0.543431	1.43308071921668	0.0952
A_21_P0014370	ENSG00000161609	Poorly Annotated	chr19:49915371-49915431_-	1.31978336704532	0.2477	1.0334729041626	0.94235
A_21_P0014385	ENSG00000267317	protein_coding	chr19:1457668-1457728_-	1.21679470725202	0.3052	1.23367219920304	0.2252
A_21_P0014389	ENSG00000115091	protein_coding	chr2:114715692-114715752_+	0.863380721992467	0.4026	1.12628149298329	0.4676
A_21_P0014396	ENSG00000269837	pseudogene	chr19:23437952-23438012_-	0.823964188562765	0.295137	0.617738266942702	0.0295
A_21_P0014397	ENSG00000228265	lncRNA	chr20:32580404-32580464_-	1.32105132057223	0.1948	0.96628170331834	0.7259
A_21_P0014421	ENSG00000183506	protein_coding	chr22:21844354-21844414_-	0.99995333786809	0.843396	1.24346282045793	0.2666
A_21_P0014422	ENSG00000203606	pseudogene	chr22:30831907-30831967_+	0.835515445573998	0.4339	0.717226521915838	0.1759
A_21_P0014428	ENSG00000182841	pseudogene	chr22:42951222-42951282_-	0.879510657716271	0.4538	0.55273769182797	0.018383
A_21_P0014431	ENSG00000224086	lncRNA	chr22:22297705-22297765_+	1.255716457166	0.411043	0.96670855942229	0.856119
A_21_P0014446	ENSG00000164161	protein_coding	chr4:145666335-145666395_+	11.9280922081945	0.000353506	5.76813218007276	0.000449568
A_21_P0014466	ENSG00000273445	lncRNA	chr2:87777026-87777086_-	0.82244652023453	0.2108	0.611065774821872	0.0431
A_21_P0014473	ENSG00000170634	pseudogene	chr2:54307371-54307431_+	0.784352414407776	0.2864	0.959252825531954	0.732603
A_21_P0014479	ENSG00000113712	protein_coding	chr5:148873912-148873972_-	1.12874457235386	0.4901	1.31055904650792	0.1826
A_21_P0014483	ENSG00000225733	lncRNA	chr3:14984404-14984464_-	0.774121234620376	0.2817	1.11485340331381	0.381006
A_21_P0014492	ENSG00000204628	Poorly Annotated	chr5:180669298-180669354_+	0.797808542370703	0.302	1.14364050307034	0.4299
A_21_P0014493	ENSG00000248275	lncRNA	chr5:180691066-180691126_+	1.84009941952876	0.0350016	1.23385373946011	0.2101
A_21_P0014494	ENSG00000268397	protein_coding	chr5:180684436-180684496_+	1.82955949142874	0.0297	1.93545429624644	0.0036
A_21_P0014503	ENSG00000236778	lncRNA	chr13:52028784-52028844_+	1.05442539434095	0.87202	1.19455626853885	0.2762
A_21_P0014550	ENSG00000129515	protein_coding	chr14:35030801-35030861_-	0.9866240136996	0.817415	0.838478891103272	0.4283
A_21_P0014558	ENSG00000259142	lncRNA	chr14:62600876-62600936_-	2.32993776009326	0.000706372	1.25381611900664	0.2455
A_21_P0014589	ENSG00000227540	lncRNA	chr10:75013924-75013984_+	1.14693253537084	0.575147	1.08879425299215	0.628975
A_21_P0014601	ENSG00000116560	pseudogene	chr1:35641985-35642045_-	1.15372544394394	0.4407	0.863410731242466	0.5279
A_21_P0014623	ENSG00000252690	protein_coding	chr15:83425861-83425921_+	1.27190261936838	0.2461	1.34702725050532	0.176622
A_21_P0014626	ENSG00000082996	protein_coding	chr3:149679861-149679921_+	0.712973842754114	0.1743	1.11520727086287	0.687777
A_21_P0014671	ENSG00000110700	protein_coding	chr11:17096643-17096703_-	0.443619557215339	0.0077	0.425033259843238	0.00651553
A_21_P0014677	ENSG00000080371	protein_coding	chr12:72184233-72184293_+	1.02798418770528	0.714717	0.922374311430725	0.6432
A_21_P0014686	ENSG00000167522	Poorly Annotated	chr16:89463728-89463788_-	2.09544721042005	0.00151905	0.97876069858533	0.906751
A_21_P0014700	ENSG00000268516	lncRNA	chr19:58769214-58769274_-	1.41939832482868	0.0643	0.960707765588072	0.701648
A_21_P0014707	ENSG00000272275	lncRNA	chr2:10908000-10908060_-	1.1830573430269	0.464862	1.44386627981611	0.0466
A_21_P0014709	ENSG00000189223	lncRNA	chr2:113998254-113998314_+	1.32215685138134	0.102462	0.512330278295037	0.034634
A_21_P0014711	ENSG00000135930	protein_coding	chr2:233446104-233446164_+	1.26033426038333	0.2394	1.02562745082585	0.796243
A_21_P0014714	ENSG00000242094	lncRNA	chr3:71619481-71619541_-	2.31272693128388	0.00113737	1.54612105876109	0.0501
A_21_P0014716	ENSG00000186001	protein_coding	chr3:197612640-197612700_+	1.50333657333572	0.0476	1.61617540791221	0.025
A_21_P0014730	ENSG00000224046	lncRNA	chr7:86780758-86780818_-	1.75614345064108	0.0372674	3.26819421231269	8.96574e-05
A_21_P0014740	ENSG00000186471	protein_coding	chrX:119054690-119054750_-	0.968245168799577	0.704633	1.31010992720644	0.265111
A_21_P0014775	ENSG00000066855	Poorly Annotated	chr8:66645425-66645485_-	1.41718998188513	0.1035	1.16990567631505	0.67215
A_21_P0014782	ENSG00000267559	lncRNA	chr9:84545145-84545205_-	0.970539012441784	0.740266	1.86056516829602	0.0032
A_21_P0014785	ENSG00000229124	lncRNA	chr10:17271693-17271753_-	1.66294123478951	0.024	1.60858862616634	0.0278
A_21_P0014791	ENSG00000010278	Poorly Annotated	chr12:6347143-6347203_-	1.49423092088815	0.0518	1.76809606881476	0.0108
A_21_P0014793	ENSG00000164830	protein_coding	chr8:107763058-107763118_+	1.34918657943059	0.945584	1.42066902182246	0.0611
A_21_P0014801	ENSG00000205047	protein_coding	chr16:87731758-87731818_-	0.949467456607711	0.567398	0.712127510416423	0.1598
A_21_P0014803	ENSG00000261282	pseudogene	chr16:51141630-51141690_+	0.896272893166944	0.353691	0.78874019383486	0.2621
A_21_P0014808	ENSG00000231096	pseudogene	chr3:67564704-67564764_+\chr17:19743785-19743845_+	0.999004099233636	0.998168	1.58369170725671	0.0442
A_21_P0014809	ENSG00000035141	protein_coding	chr2:70524420-70524480_-	0.764654992618705	0.2374	0.727975983911105	0.1671
A_21_P0014820	ENSG00000142396	lncRNA	chr19:58826632-58826692_+	0.703792289421093	0.0503	0.65300753146461	0.0831
A_21_P0014822	ENSG00000267283	lncRNA	chr19:1990309-1990369_+	1.19557349819587	0.3216	0.697429408854193	0.1122
A_21_P0014853	ENSG00000245857	lncRNA	chr8:6699913-6699973_+	1.17785944786504	0.3446	1.3694121264292	0.124
A_21_P0014863	ENSG00000078304	protein_coding	chr14:102302790-102302850_+	1.32791967714196	0.2078	0.69689273017928	0.1143
A_21_P0014870	ENSG00000139726	protein_coding	chr12:123252066-123252128_+	1.34008498532462	0.16	1.42601808980394	0.0931
A_21_P0014871	ENSG00000228519	pseudogene	chr12:77377886-77377946_-\chrX:25663451-25663926_-	0.630135499155688	0.0899	0.755978841762222	0.187
A_21_P0014876	ENSG00000119973	Poorly Annotated	chr10:120355076-120355136_+	1.02838685608424	0.741318	1.17951496774256	0.3375
A_21_P0014885	ENSG00000116396	Poorly Annotated	chr1:110773982-110774042_+	1.22098099292529	0.3699	1.20761812890766	0.3241
A_21_P0014898	ENSG00000272256	lncRNA	chr8:29940899-29940959_+	0.544468055680553	0.00725264	0.239703236640185	6.4041e-05
A_21_P0014922	ENSG00000267733	pseudogene	chr18:12223418-12223478_+	1.17024423314705	0.541146	1.03276161497128	0.905575
A_21_P0014935	ENSG00000225733	lncRNA	chr3:14986493-14986553_-	1.0405588470349	0.676886	1.02142862260955	0.850901
A_21_P0014948	ENSG00000177628	protein_coding	chr1:155206177-155206237_-	1.35277839568955	0.1907	2.37747314564856	0.0007
A_21_P0014949	ENSG00000141279	protein_coding	chr17:36352440-36352500_-\chr17:45669347-45669407_+	1.18614498524012	0.354407	1.21993938320954	0.301833
A_23_P100001	ENSG00000185442	protein_coding	chr15:93160788-93160848_-	1.6743920926955	0.0247	1.23805942140999	0.563064
A_23_P100074	ENSG00000169857	protein_coding	chr15:34158679-34158739_-	0.89572112275531	0.918329	0.974777752492902	0.705886
A_23_P100141	ENSG00000059145	protein_coding	chr16:1415285-1415345_-	1.16289177935587	0.884872	0.786280149407743	0.310884
A_23_P100196	ENSG00000103194	protein_coding	chr16:84812830-84812890_+	0.964606810038198	0.785246	0.570072310361853	0.0093
A_23_P100203	ENSG00000230989	protein_coding	chr16:83846243-83846303_+	0.782339838828369	0.252157	0.99476195839827	0.714167
A_23_P100220	ENSG00000103067	protein_coding	chr16:68263053-68263113_-	1.38523669353	0.201	1.0766645452876	0.829345
A_23_P100292	ENSG00000167962	protein_coding	chr16:2047696-2047756_-	0.918962741215253	0.5837	0.905681672236193	0.5752
A_23_P100315	ENSG00000242612	protein_coding	chr16:462220-462280_+	1.00899170003657	0.990789	0.821872574373497	0.3754
A_23_P100326	ENSG00000103148	pseudogene	chr16:135838-135898_-	0.886907567982212	0.379096	0.838771812814218	0.271086
A_23_P100355	ENSG00000149923	protein_coding	chr16:30096046-30096106_+	0.942530100623567	0.577491	1.01494244319539	0.863929
A_23_P100392	ENSG00000103363	protein_coding	chr16:2821529-2821589_-	0.833375464892114	0.3495	0.818738755421754	0.3831
A_23_P100420	ENSG00000140948	protein_coding	chr16:87440131-87440191_-	1.02210503235887	0.608042	0.723964315988338	0.156
A_23_P100441	ENSG00000172775	protein_coding	chr16:57186460-57186520_-	0.979750672091144	0.777838	1.04629375518709	0.87826
A_23_P100486	ENSG00000167397	protein_coding	chr16:31102373-31102433_-	0.74304339459014	0.1633	0.806768532488654	0.3529
A_23_P100499	ENSG00000067836	protein_coding	chr16:4849728-4849785_-	1.62648161202564	0.0614038	3.81353552120152	9.99039e-05
A_23_P100501	ENSG00000103415	protein_coding	chr16:4559721-4559781_+	0.599394512120855	0.0396	0.485473814213099	0.002
A_23_P100517	ENSG00000166822	protein_coding	chr16:75481448-75481508_-	0.846552959357777	0.2662	1.05292761624436	0.421
A_23_P100602	ENSG00000141556	protein_coding	chr17:80895162-80895222_+	0.844805658543862	0.1943	0.856474725878078	0.2924
A_23_P100632	ENSG00000189159	protein_coding	chr17:73132102-73132162_-	0.840016114017001	0.392	0.777223573122767	0.3096
A_23_P100654	ENSG00000174282	protein_coding	chr17:7362945-7363005_-	0.437952680817827	0.002	0.365072476559866	0.0003
A_23_P100660	ENSG00000132386	protein_coding	chr17:1680667-1680727_+	1.00684078856328	0.967809	0.770344443181972	0.216
A_23_P100676	ENSG00000070366	protein_coding	chr17:1963533-1963593_-	1.21584272797678	0.2308	0.872547707365418	0.4738
A_23_P100704	ENSG00000166484	protein_coding	chr17:19286633-19286693_+	1.25408721685881	0.2396	1.09043435628339	0.4759
A_23_P100711	ENSG00000109099	protein_coding	chr17:15133207-15133267_-	0.286556997203351	0.00199808	0.737326742789199	0.257743
A_23_P100730	ENSG00000141293	protein_coding	chr17:46210829-46210889_-	0.251580977481294	0.00877233	0.252076114682876	8.77362e-05
A_23_P100764	ENSG00000013306	protein_coding	chr17:42397378-42397438_-	0.770230162131182	0.2532	0.925181109243823	0.5195
A_23_P10077	ENSG00000177666	protein_coding	chr11:824895-824955_+	1.37663875796869	0.1416	0.892005944765388	0.609016
A_23_P100795	ENSG00000168610	protein_coding	chr17:40465922-40465982_-	1.25846147684895	0.3506	0.785062972400494	0.0903
A_23_P100868	ENSG00000141140	protein_coding	chr17:34868950-34869010_-	0.871255180314163	0.4865	0.889053099795224	0.5972
A_23_P100883	ENSG00000178691	protein_coding	chr17:30327535-30327595_+	0.786696519886199	0.1747	0.681213452506808	0.1087
A_23_P100963	ENSG00000182557	protein_coding	chr17:4391246-4391306_+	0.470033031887386	0.00711752	0.603351073552614	0.0404336
A_23_P101013	ENSG00000233708	pseudogene	chr1:43352338-43352398_-	0.696752409357867	0.1281	0.682960782897717	0.0659
A_23_P101093	ENSG00000005243	protein_coding	chr17:46103782-46103842_-	0.952973308132393	0.782599	1.03812145452547	0.2813
A_23_P101111	ENSG00000060069	protein_coding	chr18:77514105-77514165_+	1.90175409592275	0.0059	1.64070698790497	0.0287
A_23_P101185	ENSG00000134440	protein_coding	chr18:55268189-55268249_-	0.390961720564101	0.0006	0.763779309481945	0.1772
A_23_P101208	ENSG00000166347	protein_coding	chr18:71920717-71920777_-	0.602805789055928	0.1138	0.622268812975359	0.073
A_23_P10121	ENSG00000104332	protein_coding	chr8:41120160-41120220_-	1.44411350943532	0.1619	1.03579627745425	0.247901
A_23_P101237	ENSG00000141428	protein_coding	chr18:33557459-33557519_+	1.01097875676291	0.6692	1.60940999118737	0.0423
A_23_P101246	ENSG00000186806	lncRNA	chr19:51834958-51835018_-	2.04081386648734	0.0152744	3.50128033724217	0.00690682
A_23_P101281	ENSG00000198466	protein_coding	chr19:58376177-58376237_+	1.24865812884415	0.2093	1.06899556636977	0.797488
A_23_P101297	ENSG00000125746	protein_coding	chr19:46117861-46117910_-	1.75987806729517	0.0112	1.72759578511434	0.0181
A_23_P101332	ENSG00000129347	protein_coding	chr19:10664513-10664573_-	0.876795000618966	0.5319	0.820865119219521	0.2846
A_23_P101342	ENSG00000130734	protein_coding	chr19:10663724-10663784_+	1.30027622366889	0.138733	1.18025366534196	0.5805
A_23_P10135	ENSG00000168256	protein_coding	chr17:40176198-40176258_+	1.03388403460784	0.677957	1.00940756840366	0.856695
A_23_P101351	ENSG00000130818	protein_coding	chr19:9638978-9639038_-	0.988000931985112	0.682081	1.27492455478897	0.824903
A_23_P101380	ENSG00000177191	protein_coding	chr19:41931282-41931342_-	1.05724094689357	0.947253	1.03585157824395	0.633852
A_23_P101392	ENSG00000072954	protein_coding	chr19:16799429-16799489_+	0.91711700035158	0.890089	0.930934034920629	0.733167
A_23_P1014	ENSG00000153363	pseudogene	chr1:211605739-211605799_+	0.927133012900265	0.855247	1.20703188572005	0.578414
A_23_P101407	ENSG00000125730	protein_coding	chr19:6679176-6679434_-	1.15665143328171	0.4341	0.957038424309314	0.682446
A_23_P101461	ENSG00000104957	protein_coding	chr19:13874028-13874088_+	0.803587649065027	0.2348	0.617549996273028	0.0544
A_23_P101480	ENSG00000105613	protein_coding	chr19:12985698-12985758_+	1.68164258792072	0.0149	2.21312796283626	0.0137131
A_23_P101516	ENSG00000131398	protein_coding	chr19:50826572-50826632_-	1.50523937159479	0.0426	1.43432242383947	0.0764
A_23_P101532	ENSG00000142534	protein_coding	chr19:50001264-50002789_+	0.405167446516215	0.003	0.4215427848197	0.0018
A_23_P101551	ENSG00000105552	protein_coding	chr19:49298562-49298622_-	0.847491818397719	0.4635	0.880257192677254	0.4156
A_23_P10156	ENSG00000176108	protein_coding	chr17:78973507-78973567_+	1.0277898608679	0.906834	1.14712667828479	0.385
A_23_P101642	ENSG00000080031	protein_coding	chr19:55692767-55692827_-	2.2282243833652	0.0014627	1.12822030928689	0.848916
A_23_P101655	ENSG00000130402	protein_coding	chr19:39220304-39220364_+	1.25356013356737	0.2807	0.700699017157558	0.146
A_23_P101699	ENSG00000167674	protein_coding	chr19:4498016-4498353_+	1.13454368552262	0.4842	1.07829560787866	0.706823
A_23_P101707	ENSG00000105355	protein_coding	chr19:4839114-4839174_-	1.69888177332549	0.012	1.64663163342138	0.0287
A_23_P101737	ENSG00000104885	protein_coding	chr19:2232169-2232229_+	1.70365968637103	0.0217	1.20013017799728	0.2979
A_23_P101742	ENSG00000183617	protein_coding	chr19:3765300-3767289_+	0.494978365711535	0.0067	0.812763717620868	0.2866
A_23_P101796	ENSG00000105137	protein_coding	chr19:15225032-15225092_+	2.49878071280184	0.00012488	1.35630936242406	0.0723
A_23_P101829	ENSG00000064547	protein_coding	chr19:19735270-19735330_-	1.18294888588816	0.248731	0.981720419844064	0.713576
A_23_P10194	ENSG00000174938	protein_coding	chr16:29882858-29882918_-	1.09188153916955	0.608	0.83423664930356	0.3838
A_23_P101950	ENSG00000014641	protein_coding	chr2:63834236-63834296_+	0.429053311354261	0.0037	1.30549146079764	0.609014
A_23_P101960	ENSG00000152518	protein_coding	chr2:43451155-43451215_-	0.776992773803894	0.1461	0.381126155609488	0.00261671
A_23_P102000	ENSG00000121966	protein_coding	chr2:136871952-136872012_-	0.607219818589814	0.0606	0.407612946614226	0.000619276
A_23_P102060	ENSG00000138434	protein_coding	chr2:182795034-182795094_+	1.18775234388655	0.288181	0.944037152790399	0.748059
A_23_P102109	ENSG00000127824	protein_coding	chr2:220115146-220115206_-	1.38676635921236	0.2129	0.924471330370853	0.6107
A_23_P102122	ENSG00000163466	protein_coding	chr2:219118657-219118717_+	0.887045613084963	0.5439	0.691645041676927	0.1898
A_23_P102202	ENSG00000116062	protein_coding	chr2:48033918-48033978_+	0.919844131567943	0.927237	0.729152184936677	0.2188
A_23_P102235	ENSG00000224543	pseudogene	chr1:205320529-205320589_+\chr19:14600354-14600414_+\chr2:109868033-109868089_+	0.537697122783242	0.0165	0.919153332568088	0.509569
A_23_P102242	ENSG00000136536	protein_coding	chr2:160623820-160623880_+	1.26192732163491	0.0912238	1.11376748155318	0.871727
A_23_P102258	ENSG00000204822	protein_coding	chr2:74699206-74699266_-	0.760952922011061	0.2345	1.05748830011588	0.674549
A_23_P102262	ENSG00000115364	protein_coding	chr2:75882658-75882718_+	0.497304889575979	0.0037	0.95258114783698	0.421661
A_23_P102320	ENSG00000163002	protein_coding	chr2:184026314-184026374_+	0.657959313056618	0.2346	0.782906068813529	0.179434
A_23_P102364	ENSG00000066248	protein_coding	chr2:233743467-233743527_-	1.4154377285949	0.177777	0.981763940533406	0.5197
A_23_P102391	ENSG00000138449	protein_coding	chr2:190425749-190425809_-	1.39570268632649	0.123765	1.3712805830405	0.291782
A_23_P102404	ENSG00000135624	protein_coding	chr2:73479768-73479828_+	0.663161540668193	0.1665	0.772625039157176	0.3479
A_23_P102412	ENSG00000116095	protein_coding	chr2:179369324-179369384_+	0.743114706699877	0.1672	1.25013910174184	0.2294
A_23_P102420	ENSG00000115484	protein_coding	chr2:62095674-62095734_-	0.523284319957284	0.0172	0.756218966969343	0.1906
A_23_P102471	ENSG00000095002	protein_coding	chr2:47710160-47710220_+	0.344150692430156	0.000176113	0.395391692511417	0.0020269
A_23_P102508	ENSG00000138074	protein_coding	chr2:27423051-27423111_-	0.825554335870464	0.1798	0.796623482527975	0.4628
A_23_P102517	ENSG00000156973	protein_coding	chr2:232597656-232597716_-	0.742578032571353	0.0467	1.45083181455581	0.0996555
A_23_P102542	ENSG00000119844	protein_coding	chr2:64819946-64820006_+	0.880107762535009	0.3958	0.961861042503131	0.6507
A_23_P102571	ENSG00000125520	protein_coding	chr20:62374773-62374833_+	0.56631711283332	0.0343	0.430756052686376	0.0012
A_23_P102582	ENSG00000101084	protein_coding	chr20:35240816-35240876_+	0.829843477959678	0.3212	1.2022109281483	0.3379
A_23_P102611	ENSG00000064205	protein_coding	chr20:43356346-43356406_+	0.891143401293801	0.4356	0.738798460690412	0.1715
A_23_P102731	ENSG00000088826	protein_coding	chr20:4168299-4168359_+	1.07494016182855	0.691923	1.55794419009565	0.0925
A_23_P102770	ENSG00000173418	protein_coding	chr20:20013858-20013918_+	0.595749918418581	0.0425	0.920082889561738	0.4907
A_23_P102832	ENSG00000126001	protein_coding	chr20:34099580-34099640_+	1.22181738600382	0.2964	1.02011326642407	0.895463
A_23_P102842	ENSG00000244005	protein_coding	chr20:34257046-34257106_-	1.18738741431538	0.2242	1.10271860828998	0.4087
A_23_P102876	ENSG00000156261	protein_coding	chr21:30433668-30433728_-	0.709355975620004	0.1886	0.925464944726769	0.5146
A_23_P102890	ENSG00000243927	protein_coding	chr21:35515226-35515286_+	0.486647797290215	0.0028	0.811311802201462	0.26387
A_23_P1029	ENSG00000117122	protein_coding	chr1:17302137-17302197_-	1.44790980138543	0.0808	0.963210738771829	0.89863
A_23_P102925	ENSG00000241945	protein_coding	chr21:45550592-45550652_+	0.871250696255184	0.3497	0.901994193430347	0.6062
A_23_P102937	ENSG00000184900	protein_coding	chr21:46225939-46225999_-	0.782713435095328	0.2032	2.31475003263431	0.0023
A_23_P102965	ENSG00000099968	protein_coding	chr22:18211362-18211422_+	1.24792607184832	0.1536	1.45952991792985	0.119
A_23_P103011	ENSG00000100228	protein_coding	chr22:23506427-23506487_+	1.97744128307195	0.0043	1.39801779698308	0.13297
A_23_P103070	ENSG00000128245	protein_coding	chr22:32353137-32353197_+	1.05328316792201	0.766964	1.29650347949917	0.0564854
A_23_P103104	ENSG00000100060	protein_coding	chr22:37865324-37865384_-	0.589442616694287	0.00489978	0.444100561513129	0.0016
A_23_P103110	ENSG00000185022	protein_coding	chr22:38611983-38612043_+	1.24549358831166	0.141299	0.465600133167686	0.0008
A_23_P103131	ENSG00000100335	protein_coding	chr22:39912039-39912099_+	0.733785985082623	0.1782	1.12893668241416	0.538627
A_23_P103149	ENSG00000100412	protein_coding	chr22:41924817-41924877_+	0.83709979487451	0.4369	0.835064455073574	0.4104
A_23_P103276	ENSG00000198841	protein_coding	chr1:52497959-52498019_-	0.641312828560522	0.0569	0.823016546375332	0.0208
A_23_P103282	ENSG00000116209	protein_coding	chr1:54497826-54497886_-	0.669615958775733	0.063	0.925225678986475	0.6423
A_23_P103361	ENSG00000182866	protein_coding	chr1:32751431-32751491_+	0.528062149317106	0.0341479	0.222920809227059	6.98047e-05
A_23_P103398	ENSG00000143801	protein_coding	chr1:227083659-227083719_+	0.758579232474965	0.126251	0.715312711216698	0.0577
A_23_P103414	ENSG00000198492	protein_coding	chr1:29095982-29096042_+	0.955789721221761	0.738359	1.32401261925674	0.1952
A_23_P103442	ENSG00000163875	protein_coding	chr1:37959050-37959110_-	0.492188294552242	0.0052	0.563571542020672	0.0162
A_23_P103476	ENSG00000120942	protein_coding	chr1:11346236-11346296_+	0.777041189051329	0.3083	1.02449634851656	0.5201
A_23_P103503	ENSG00000198625	protein_coding	chr1:204518622-204518682_+	0.877404531319359	0.360806	0.838970470791291	0.2228
A_23_P103511	ENSG00000239887	protein_coding	chr1:162356482-162356542_+	2.30106543934632	0.00373679	2.81040714929328	0.000708934
A_23_P103532	ENSG00000143147	protein_coding	chr1:168065831-168065891_-	1.45982205336552	0.0866	1.17812920019201	0.3687
A_23_P103601	ENSG00000117643	protein_coding	chr1:26110834-26110894_+	0.715713467148303	0.2101	0.725931237136981	0.1717
A_23_P103617	ENSG00000143412	protein_coding	chr1:150967942-150968002_+	1.83789098570582	0.124	1.23235590595168	0.969548
A_23_P103631	ENSG00000117395	protein_coding	chr1:43630014-43630074_-	0.577668353901762	0.0482	0.881692747339648	0.415201
A_23_P103661	ENSG00000163374	protein_coding	chr1:155629423-155629483_-	1.30192410456017	0.2403	0.899144633798573	0.6006
A_23_P103672	ENSG00000132688	protein_coding	chr1:156638840-156638900_-	1.27149682751575	0.2364	0.804943972438475	0.2787
A_23_P103690	ENSG00000160767	protein_coding	chr1:155217284-155217344_-	1.22347858396655	0.2825	1.23291681980489	0.2565
A_23_P103720	ENSG00000116771	protein_coding	chr1:15900095-15900155_-	0.912791304650374	0.2892	0.693096536828717	0.2789
A_23_P10374	ENSG00000179912	protein_coding	chr12:57647661-57647721_-	1.02058344222689	0.991221	0.8575085257851	0.4494
A_23_P103837	ENSG00000143569	protein_coding	chr1:154234144-154235609_+	1.07430508570528	0.972873	0.819493258071569	0.3531
A_23_P103905	ENSG00000143222	protein_coding	chr1:161127455-161127942_+	0.723289005855323	0.1153	1.38122426138551	0.1335
A_23_P103919	ENSG00000158850	protein_coding	chr1:161141346-161141406_-	0.918544297910839	0.6208	0.743956155272836	0.2606
A_23_P103932	ENSG00000000938	protein_coding	chr1:27938837-27938897_-	0.891253727023323	0.3829	1.02771122360679	0.880255
A_23_P103942	ENSG00000007923	protein_coding	chr1:6694374-6694433_-	0.806349437443647	0.2934	0.799989264325141	0.2879
A_23_P103968	ENSG00000162482	protein_coding	chr1:19611179-19611233_-	0.846784402390235	0.443	0.731712064774414	0.1995
A_23_P104046	ENSG00000162813	protein_coding	chr1:220233049-220233109_-	1.61726098567178	0.048773	1.68259448949714	0.0043
A_23_P104054	ENSG00000094975	protein_coding	chr1:172580755-172580815_+	0.649725474732113	0.0416	0.653711666529089	0.0779
A_23_P104109	ENSG00000136643	protein_coding	chr1:213446223-213446283_+	1.38445791022515	0.259254	2.27650387055061	0.0021
A_23_P104116	ENSG00000131795	protein_coding	chr1:145509244-145509304_+	0.660159295267542	0.0645	0.553948647692764	0.0147
A_23_P104146	ENSG00000146463	protein_coding	chr1:35887009-35887069_+	0.613914136030049	0.1156	1.20696048888489	0.815991
A_23_P104151	ENSG00000159596	protein_coding	chr1:46159442-46159502_+	1.08350717636354	0.691116	1.15574416843727	0.543593
A_23_P104188	ENSG00000163435	protein_coding	chr1:201984428-201984488_+	1.59621279209168	0.0462	0.968389494383219	0.799839
A_23_P104199	ENSG00000150093	protein_coding	chr10:33200506-33200566_-	0.883794550882415	0.329135	1.06084623259609	0.888768
A_23_P104201	ENSG00000136758	protein_coding	chr10:27400748-27400808_-	1.23473315999015	0.4062	1.43768950908179	0.0716
A_23_P104318	ENSG00000168209	protein_coding	chr10:74035362-74035422_+	1.37781151351582	0.1694	0.54954541124035	0.0176779
A_23_P104362	ENSG00000127884	protein_coding	chr10:135176254-135176314_-	0.692369886253061	0.1596	0.555223824009391	0.0108
A_23_P104372	ENSG00000213551	protein_coding	chr10:75002673-75002733_-	0.674052074274201	0.248641	0.708108004966021	0.125
A_23_P10442	ENSG00000141447	protein_coding	chr18:21742125-21742185_-	1.73473462401931	0.081024	0.70001761888865	0.0783554
A_23_P104464	ENSG00000012779	protein_coding	chr10:45941416-45941476_+	0.771384322742474	0.126	0.77039297282668	0.2893
A_23_P104471	ENSG00000079393	protein_coding	chr10:76854215-76854275_-	2.1378311442016	0.061879	2.55723145414859	0.00433814
A_23_P104563	ENSG00000110090	protein_coding	chr11:68527062-68527122_-	1.61004598403718	0.00537816	2.41109442231976	0.0003
A_23_P104583	ENSG00000172725	protein_coding	chr11:67207703-67207834_-	0.881459354353101	0.4809	0.909632191313934	0.4775
A_23_P104607	ENSG00000165916	protein_coding	chr11:47444433-47444493_-	0.705856144150563	0.1891	0.840292504371004	0.429
A_23_P104617	ENSG00000165905	protein_coding	chr11:45950426-45950486_+	1.46684870851139	0.0733	1.05558801884378	0.788415
A_23_P10463	ENSG00000168653	protein_coding	chr1:39500181-39500241_+	0.557552842909861	0.0203	0.951047142345615	0.697096
A_23_P104641	ENSG00000149823	protein_coding	chr11:64878901-64878961_+	0.699314352230032	0.1424	0.710764620319685	0.1421
A_23_P104651	ENSG00000146670	protein_coding	chr11:64844995-64845055_-	0.80943397405331	0.3059	1.05278358694484	0.876492
A_23_P104689	ENSG00000173039	protein_coding	chr11:65421650-65421710_-	1.18351060011634	0.4024	0.889773907449585	0.459
A_23_P104692	ENSG00000174516	protein_coding	chr11:66244672-66244732_+	1.86207248792302	0.137392	2.91650045571256	0.000509766
A_23_P104734	ENSG00000134910	protein_coding	chr11:125489998-125490703_+	0.775972170724429	0.1492	0.986256108401617	0.65702
A_23_P104762	ENSG00000137693	protein_coding	chr11:102100583-102100643_+	0.927862153979019	0.4573	1.1723192633528	0.1088
A_23_P104892	ENSG00000110321	protein_coding	chr11:10819041-10819100_-	0.903677743733977	0.477	0.796853168347939	0.3618
A_23_P104942	ENSG00000213593	protein_coding	chr11:57508263-57508323_+	0.713762671798527	0.2127	0.987057891747975	0.725815
A_23_P10497	ENSG00000166377	protein_coding	chr18:77137940-77138000_+	1.52429236902189	0.588593	1.74674133443946	0.181586
A_23_P105002	ENSG00000149489	protein_coding	chr11:62382503-62382563_+	2.31383098684805	0.0169049	4.1043322203281	6.4041e-05
A_23_P105028	ENSG00000184743	protein_coding	chr11:63396740-63396800_-	1.45946877371537	0.0467	1.96632596807254	0.0052
A_23_P105044	ENSG00000214026	protein_coding	chr11:1974020-1974080_+	0.714638335872777	0.1672	1.0343267003907	0.824509
A_23_P105066	ENSG00000166333	protein_coding	chr11:6631738-6631798_+	1.09365051063312	0.5989	1.16571550802594	0.2965
A_23_P105138	ENSG00000121691	protein_coding	chr11:34493033-34493093_+	0.524579146637956	0.00904899	0.710589273733116	0.0921121
A_23_P105276	ENSG00000198040	protein_coding	chr12:133635753-133635813_+	0.706899677932641	0.1271	0.618916068613237	0.0547121
A_23_P105307	ENSG00000065357	protein_coding	chr12:56346853-56346913_+	1.32876066270233	0.173623	0.810345540781734	0.4027
A_23_P105313	ENSG00000111361	protein_coding	chr12:124105758-124105818_-	0.633057545225922	0.147	1.01228420159307	0.995776
A_23_P105392	ENSG00000166226	protein_coding	chr12:69995180-69995240_+	0.562310145979582	0.035	0.543854905726194	0.0086
A_23_P105436	ENSG00000179295	protein_coding	chr12:112915512-112915698_+	1.05546868568871	0.633901	1.13755705201002	0.386353
A_23_P105519	ENSG00000084463	protein_coding	chr12:14939874-14939934_-	0.51565760260708	0.0081	0.425715230210659	0.0005
A_23_P105571	ENSG00000111666	protein_coding	chr12:102110520-102110580_+	1.88043263213314	0.0744912	1.65121676414681	0.0336241
A_23_P10559	ENSG00000181409	protein_coding	chr17:79091194-79091254_-	1.46102642060929	0.1529	1.15084648093834	0.443688
A_23_P105592	ENSG00000110921	protein_coding	chr12:110034940-110035000_+	0.937724286923684	0.6214	0.987616722098662	0.797266
A_23_P1056	ENSG00000117262	protein_coding	chr1:147465172-147465232_+\chr1:145923466-145923526_+\chr1:145764935-145764995_-	0.578059346217548	0.0201	0.953800917833159	0.798967
A_23_P105619	ENSG00000198270	protein_coding	chr12:112369489-112369549_-	0.686151119224345	0.1525	0.731994711506261	0.1815
A_23_P105625	ENSG00000110871	protein_coding	chr12:120941315-120941375_-	0.998014463703765	0.997329	1.28368242448732	0.1945
A_23_P105664	ENSG00000133773	protein_coding	chr12:82746855-82746915_-	0.635646489294546	0.0499	0.772139838989129	0.2035
A_23_P105747	ENSG00000136044	protein_coding	chr12:105567942-105568002_-	1.0237305389364	0.891187	0.769377870982656	0.488479
A_23_P105900	ENSG00000118903	pseudogene	chr13:77502689-77502749_+	0.635117560391961	0.0851	1.0381865684361	0.95192
A_23_P10591	ENSG00000176845	protein_coding	chr17:81052489-81052549_+	1.21183047089642	0.714139	1.2981502759779	0.1979
A_23_P105957	ENSG00000072110	protein_coding	chr14:69341702-69343826_-	1.46429571285102	0.0711	0.686714278809035	0.063
A_23_P106002	ENSG00000100906	protein_coding	chr14:35870787-35870847_-	1.128971544599	0.289053	0.685641162866758	0.777527
A_23_P106056	ENSG00000129562	protein_coding	chr14:23033948-23034008_-	0.727453787184553	0.2074	0.730260877613519	0.1263
A_23_P106127	ENSG00000100578	protein_coding	chr14:59014697-59014757_+	1.7193945799193	0.0077	1.84488224208613	0.0041
A_23_P106145	ENSG00000197930	protein_coding	chr14:53112989-53113136_-	1.2499352228694	0.195554	1.59849402758359	0.0286
A_23_P106194	ENSG00000170345	protein_coding	chr14:75748213-75748273_+	0.56976710179384	0.0582638	0.143675858076155	6.4041e-05
A_23_P106204	ENSG00000100577	protein_coding	chr14:77797433-77797493_+	1.06827566298483	0.633666	1.08578848932893	0.5231
A_23_P106241	ENSG00000100815	protein_coding	chr14:92435891-92435951_-	1.06465929267287	0.188316	1.56362641515773	0.0396
A_23_P106299	ENSG00000140264	protein_coding	chr15:44085931-44085991_+	1.11101099514461	0.5954	1.08829401586933	0.647315
A_23_P106362	ENSG00000103569	protein_coding	chr15:58477883-58477943_+	0.947680447880318	0.1601	0.878025150324356	0.08678
A_23_P106433	ENSG00000166965	protein_coding	chr15:91505418-91505478_+	0.725383527230318	0.164	0.900029312182339	0.36149
A_23_P106463	ENSG00000180304	protein_coding	chr15:64980063-64980123_-	0.727914541304408	0.1227	0.56384011695622	0.0191
A_23_P106481	ENSG00000128463	protein_coding	chr15:34520663-34520723_+	0.527592076397093	0.0236	0.868102140846096	0.4349
A_23_P106544	ENSG00000103121	protein_coding	chr16:81009884-81009944_-	0.73739910021858	0.173	0.85339930363838	0.3039
A_23_P106633	ENSG00000182810	protein_coding	chr16:68055251-68055311_-	0.597939020775036	0.06	0.776789494687031	0.2715
A_23_P106675	ENSG00000197943	protein_coding	chr16:81991574-81991634_+	1.20915368423787	0.367811	0.955512059561286	0.853769
A_23_P106682	ENSG00000213853	protein_coding	chr16:10626699-10626759_-	1.12952545542655	0.4014	1.05881181306137	0.799024
A_23_P106694	ENSG00000131165	protein_coding	chr16:89711070-89711130_-	1.08406682600459	0.584729	0.823655101052763	0.3235
A_23_P106720	ENSG00000183751	protein_coding	chr16:2026104-2026260_+	0.719104395401832	0.1125	0.925322508119435	0.736993
A_23_P106727	ENSG00000090565	protein_coding	chr16:572085-572145_+	1.00217150785057	0.100368	0.845039523299991	0.3899
A_23_P106737	ENSG00000007392	protein_coding	chr16:256019-256079_-	0.794223159809394	0.3102	0.817652292214121	0.3348
A_23_P106741	ENSG00000103035	protein_coding	chr16:74340101-74340161_+	0.911864483812169	0.4775	1.05905393783042	0.733382
A_23_P106761	ENSG00000102879	protein_coding	chr16:30199316-30199376_+	0.747634636250542	0.1962	0.721894772563647	0.166
A_23_P106773	ENSG00000197165	protein_coding	chr16:28603266-28603326_-	0.799398295090813	0.1092	0.758096155012529	0.140181
A_23_P106798	ENSG00000196470	protein_coding	chr16:48395540-48395600_-	0.835391668346394	0.0701	0.592078748001938	0.0292
A_23_P106822	ENSG00000141101	protein_coding	chr16:69776206-69776266_-	0.664810694450861	0.1399	0.622986442011476	0.0179
A_23_P106835	ENSG00000125124	protein_coding	chr16:56518632-56518692_-	0.64522128340573	0.133687	1.04228068154165	0.936899
A_23_P106844	ENSG00000125148	protein_coding	chr16:56643331-56643391_+	0.725649985586447	0.066	0.776071113784864	0.181509
A_23_P10685	ENSG00000133265	protein_coding	chr19:55773727-55773787_-	1.09654898097302	0.5924	0.89431498242001	0.5498
A_23_P106859	ENSG00000131148	protein_coding	chr16:85813016-85813076_-	0.958973697172944	0.5917	1.19474637974343	0.2715
A_23_P106887	ENSG00000089280	protein_coding	chr16:31201098-31201403_+	0.636416448202157	0.0684	0.4267583797707	0.001
A_23_P106898	ENSG00000175938	protein_coding	chr16:30965488-30965548_+	0.879710271431383	0.1434	0.849071376272517	0.045
A_23_P106973	ENSG00000184640	protein_coding	chr17:75496556-75496616_+	0.478631676755405	0.0071	0.636764831019133	0.0393
A_23_P106998	ENSG00000181610	protein_coding	chr17:55918567-55919011_-	0.461392326923656	0.0103	1.08536066618772	0.752789
A_23_P107036	ENSG00000178307	protein_coding	chr17:21101442-21101502_-	1.15732073431413	0.2616	1.25016230748261	0.2155
A_23_P107051	ENSG00000173991	protein_coding	chr17:37822739-37822799_+	1.48253569824141	0.0745014	1.09875716600356	0.4748
A_23_P107073	ENSG00000132383	protein_coding	chr17:1801165-1801225_+	0.380586880291948	0.0003	0.478778712867931	0.0029
A_23_P107116	ENSG00000128482	protein_coding	chr17:19320488-19320548_+	1.20288172554575	0.985586	1.02264839891202	0.292089
A_23_P1072	ENSG00000163399	protein_coding	chr1:116944236-116944277_+	0.915629949769205	0.5355	1.41097414617591	0.269756
A_23_P107283	ENSG00000173917	protein_coding	chr17:46620126-46620186_-	0.454175934765814	0.030862	0.32993504274301	0.00259686
A_23_P107313	ENSG00000132581	protein_coding	chr17:26982416-26982476_-	0.971697723247542	0.603045	1.084638003653	0.507665
A_23_P107322	ENSG00000167549	protein_coding	chr17:27942049-27942109_-	1.5218403093042	0.0488	1.32325449925902	0.2095
A_23_P107412	ENSG00000185624	protein_coding	chr17:79801586-79801646_-	0.857705088201064	0.5605	0.814518495553792	0.4084
A_23_P107421	ENSG00000167900	protein_coding	chr17:76170192-76170252_-	0.80119989346469	0.3166	1.13529017204799	0.856277
A_23_P107587	ENSG00000141458	protein_coding	chr18:21112217-21113347_-	1.06102558512787	0.673575	1.25584632245662	0.2474
A_23_P107644	ENSG00000167088	protein_coding	chr18:19209070-19209130_+	0.696917024402261	0.1274	0.671103215238644	0.0844
A_23_P107653	ENSG00000105379	protein_coding	chr19:51848574-51848634_-	0.906590263996139	0.5336	1.10753147652856	0.494574
A_23_P107661	ENSG00000105568	protein_coding	chr19:52729052-52729268_+	1.28392099260568	0.186	0.929373558776469	0.737479
A_23_P107684	ENSG00000083812	protein_coding	chr19:58984465-58984525_+	0.961051235800109	0.625968	0.570167653092876	0.0168
A_23_P107735	ENSG00000105369	protein_coding	chr19:42385355-42385415_+	1.31323187700058	0.1691	1.18925863985295	0.3632
A_23_P107795	ENSG00000105341	protein_coding	chr19:41937270-41937330_-	1.13746459147568	0.4242	1.20648239631812	0.2495
A_23_P107801	ENSG00000105072	protein_coding	chr19:16632085-16632145_+	1.00580232176874	0.978525	1.47610805811782	0.0572
A_23_P107933	ENSG00000105053	protein_coding	chr19:50498153-50498484_-	1.3673674540385	0.375785	0.836691469197891	0.285019
A_23_P107994	ENSG00000130748	protein_coding	chr19:47549316-47549376_-	0.640327313982156	0.0951	0.836508964395833	0.3193
A_23_P108028	ENSG00000167635	protein_coding	chr19:36728854-36728914_+	0.585055026417471	0.0229	0.803324062150039	0.3567
A_23_P10815	ENSG00000134644	protein_coding	chr1:31404593-31404653_-	0.976605604028786	0.919769	1.11187329202542	0.757613
A_23_P108244	ENSG00000126267	protein_coding	chr19:36149508-36149568_+	0.815744842276898	0.3562	0.970225906466462	0.856398
A_23_P108294	ENSG00000141934	protein_coding	chr19:282193-282253_-	1.45376007377517	0.0559	1.19080688625926	0.3562
A_23_P108303	ENSG00000267855	protein_coding	chr19:8376274-8376334_-	0.816829976077142	0.3514	1.17276575065502	0.473565
A_23_P108501	ENSG00000116106	protein_coding	chr2:222290716-222290776_-	0.653800673344961	0.0485	0.653719202926955	0.0735492
A_23_P108514	ENSG00000115661	protein_coding	chr2:220113350-220113410_+	1.4862578665073	0.0552	1.71798648669122	0.0123
A_23_P108554	ENSG00000079785	protein_coding	chr2:15770974-15771034_+	0.626815810899146	0.1034	0.870069204241656	0.3503
A_23_P10858	ENSG00000176915	protein_coding	chr12:133302929-133302989_-	1.01650392728514	0.992279	0.960666002339059	0.700804
A_23_P108641	ENSG00000035141	protein_coding	chr2:70523167-70523227_-	0.631493096276379	0.069	0.71164205133438	0.2564
A_23_P108657	ENSG00000196151	protein_coding	chr2:160112801-160112861_-	2.26569503508286	0.00342299	2.79174683283214	0.00145245
A_23_P108662	ENSG00000115275	protein_coding	chr2:74688283-74688343_-	0.938997005358793	0.615	0.993364642715792	0.962697
A_23_P10870	ENSG00000175283	protein_coding	chr9:131708108-131708168_-	0.843085655294941	0.4956	0.962390814044332	0.4633
A_23_P108708	ENSG00000168894	protein_coding	chr2:85823985-85824045_+	0.725991167213934	0.1242	0.851234181168585	0.4918
A_23_P108751	ENSG00000115641	protein_coding	chr2:105977301-105977361_-	1.18503989717616	0.700913	1.07812902052274	0.776972
A_23_P108761	ENSG00000158435	protein_coding	chr2:101885804-101885864_+	1.19217911603672	0.277	0.964498039370998	0.7147
A_23_P108785	ENSG00000115091	protein_coding	chr2:114715502-114715562_+	0.93293599907899	0.247071	1.13287748771874	0.4169
A_23_P108823	ENSG00000079156	protein_coding	chr2:179260252-179260312_+	0.710660177697422	0.0657413	0.924264540973434	0.478225
A_23_P108835	ENSG00000119801	protein_coding	chr2:30383127-30383187_+	0.790788674864573	0.2689	0.660671493725398	0.0789
A_23_P108922	ENSG00000114978	protein_coding	chr2:74382184-74382244_-	1.41467468122265	0.0681	1.46768028396338	0.0221
A_23_P108948	ENSG00000226276	Poorly Annotated	chr2:216808099-216808159_-	1.68905915829694	0.0245	1.87196750743473	0.0061
A_23_P109026	ENSG00000124249	protein_coding	chr20:43379592-43379652_+	1.47895818197037	0.0824	1.19281838843677	0.4222
A_23_P109034	ENSG00000124145	protein_coding	chr20:43954577-43954637_-	1.17190744531245	0.4492	0.963911895092694	0.705034
A_23_P109072	ENSG00000101115	protein_coding	chr20:50400855-50400915_-	0.992971669260238	0.780511	0.913747659878938	0.6207
A_23_P109133	ENSG00000101200	protein_coding	chr20:3063390-3063449_-	1.11777877509783	0.5412	1.56109581500522	0.0326
A_23_P109143	ENSG00000171867	protein_coding	chr20:4681922-4681982_+	1.01854417601091	0.987047	1.54608816857225	0.155154
A_23_P109254	ENSG00000131051	protein_coding	chr20:34292370-34292430_-	0.889929650543126	0.338	0.681384425875183	0.1011
A_23_P109269	ENSG00000130702	protein_coding	chr20:60885301-60885361_-	1.42326139287186	0.1048	1.01023288694168	0.872464
A_23_P109322	ENSG00000183036	protein_coding	chr21:41301046-41301106_+	1.26485533553743	0.0191	1.06878299885287	0.1977
A_23_P109333	ENSG00000160221	protein_coding	chr21:45565391-45565451_+	0.806471180597467	0.4402	0.776257318569139	0.2839
A_23_P109345	ENSG00000183255	protein_coding	chr21:46269875-46269935_-	1.07272510027891	0.634152	1.07620339071495	0.580907
A_23_P109410	ENSG00000184436	protein_coding	chr22:21355037-21355565_-	0.616454360241835	0.0628	0.71509666523923	0.1449
A_23_P109442	ENSG00000100099	protein_coding	chr22:26848099-26848159_-	0.844042707321208	0.4152	1.19095210445681	0.2297
A_23_P109470	ENSG00000100296	protein_coding	chr22:29916022-29916082_-	1.00813183613951	0.999415	0.948557876600148	0.690115
A_23_P109547	ENSG00000100335	protein_coding	chr22:39913628-39913688_+	0.695246334174762	0.401879	1.01564835977135	0.3354
A_23_P109593	ENSG00000054611	protein_coding	chr22:47507417-47507477_+	1.00273146340184	0.3902	0.730179750400685	0.182
A_23_P109636	ENSG00000144749	protein_coding	chr3:66429596-66429656_-	0.989580349895136	0.933651	0.773083898963739	0.2339
A_23_P109677	ENSG00000232407	pseudogene	chr3:60676268-60676328_-	1.04245104723717	0.456022	0.698226792943483	0.1478
A_23_P109768	ENSG00000114125	protein_coding	chr3:141464249-141464309_+	1.06228802547088	0.599229	1.99510875179321	0.0043
A_23_P109774	ENSG00000066422	protein_coding	chr3:101368573-101368633_-	1.10786247429152	0.1637	1.24044914607615	0.2696
A_23_P109821	ENSG00000171148	protein_coding	chr3:9821671-9821731_-	1.05036134600576	0.781703	1.04199948795938	0.6138
A_23_P109877	ENSG00000164091	protein_coding	chr3:52289553-52289613_-	0.766259234146615	0.2007	0.716918558492371	0.0519
A_23_P109881	ENSG00000055955	protein_coding	chr3:52847318-52847378_-	2.71627682089385	0.0266404	3.01450624697246	0.000490554
A_23_P109895	ENSG00000225697	protein_coding	chr3:48663705-48663765_-	3.14946297511183	0.0016196	2.73790460253035	0.0001
A_23_P109928	ENSG00000163636	protein_coding	chr3:64004290-64004350_-	1.10983930564181	0.5276	1.15510161953374	0.3931
A_23_P110005	ENSG00000145029	protein_coding	chr3:49460589-49460649_-	1.17462852320624	0.280101	2.27453573600684	0.00534806
A_23_P11005	ENSG00000136378	protein_coding	chr15:79051789-79051849_-	0.562599642736669	0.023	1.0363288479115	0.981655
A_23_P110062	ENSG00000145191	protein_coding	chr3:183861960-183862392_+	0.619997168040776	0.0251	0.629976779969803	0.0567
A_23_P110076	ENSG00000185798	protein_coding	chr3:196281346-196281406_-	0.868213129156577	0.1747	0.80940522987695	0.2474
A_23_P110167	ENSG00000085871	protein_coding	chr4:140625255-140625315_+	0.679873988280099	0.0666	0.738661791225538	0.1612
A_23_P110196	ENSG00000138646	protein_coding	chr4:89426888-89426948_+	0.526822638037396	0.0432078	0.607103990176762	0.0486455
A_23_P110212	ENSG00000151726	protein_coding	chr4:185677492-185677553_-	1.37658302283982	0.1659	1.17308183027238	0.2037
A_23_P110243	ENSG00000145388	protein_coding	chr4:119631542-119631602_+	1.01841652092366	0.744127	1.18330234175874	0.2379
A_23_P11025	ENSG00000147394	protein_coding	chrX:152141631-152141691_+	0.95162267609901	0.514937	0.912788673861746	0.572038
A_23_P11032	ENSG00000065923	protein_coding	chrX:46466528-46466588_-	1.01034051909837	0.735509	1.08981740397258	0.869443
A_23_P110362	ENSG00000109270	protein_coding	chr4:100803118-100803178_-	0.769167874997687	0.104019	1.15645571805107	0.600927
A_23_P110445	ENSG00000113108	protein_coding	chr5:139938087-139938147_-	1.64964199069015	0.0668844	1.0027532075416	0.896142
A_23_P110473	ENSG00000249437	protein_coding	chr5:70264590-70264650_-	2.64928381120065	7.62088e-05	3.184754043572	0.000300993
A_23_P110492	ENSG00000145495	protein_coding	chr5:10435311-10435371_+	1.0240687471581	0.973534	1.26180405759421	0.1692
A_23_P110504	ENSG00000049656	protein_coding	chr5:1318411-1318471_-	0.826602770655503	0.3083	0.868671292232609	0.518
A_23_P110531	ENSG00000134363	protein_coding	chr5:52780836-52780896_+	0.913507912991457	0.5366	0.649249919322875	0.0593
A_23_P110571	ENSG00000069020	protein_coding	chr5:66462807-66462867_+	3.28256922758354	0.00085879	3.04667710277388	0.0293346
A_23_P110661	ENSG00000039123	protein_coding	chr5:54720637-54720697_+	0.540497276527846	0.0282	1.07474839005184	0.522187
A_23_P110712	ENSG00000120129	protein_coding	chr5:172195295-172195355_-	0.6894834796668	0.2081	0.340573012470688	0.000416907
A_23_P110791	ENSG00000182578	protein_coding	chr5:149432860-149432920_-	0.566139696600837	0.0028	0.571942320315212	0.00123855
A_23_P110811	ENSG00000127184	protein_coding	chr5:85916509-85916569_+	0.344338210804858	0.0004	1.05560026076196	0.989388
A_23_P110846	ENSG00000155508	protein_coding	chr5:154255812-154255872_+	1.13551051249272	0.555705	1.24331811024675	0.3452
A_23_P110851	ENSG00000164362	protein_coding	chr5:1253304-1253364_-	1.30508972970132	0.645679	1.00430982545859	0.4886
A_23_P110882	ENSG00000187189	protein_coding	chr6:116571188-116571248_-	0.829091820331423	0.2542	0.87245579459679	0.3195
A_23_P110961	ENSG00000060762	protein_coding	chr6:166778447-166778507_-	0.705880024257214	0.0945	0.897828703696694	0.4567
A_23_P111000	ENSG00000240065	protein_coding	chr6:32823917-32823977_+	0.409716769577976	0.0002	0.650237877320493	0.0590855
A_23_P111005	ENSG00000137207	protein_coding	chr6:43479785-43479845_-	0.950639987646204	0.6261	0.667942440341997	0.0994
A_23_P111037	ENSG00000198366	protein_coding	chr6:26020880-26020940_+	0.686966532618217	0.1206	1.00770840262389	0.818767
A_23_P111041	ENSG00000168242	protein_coding	chr6:26273374-26273434_+\chr6:27782992-27783030_+	1.39721111788785	0.1374	1.24243666763577	0.2697
A_23_P111054	ENSG00000196226	protein_coding	chr6:26043505-26043565_-	1.35471307366892	0.1974	1.28548957099481	0.2223
A_23_P111092	ENSG00000204688	protein_coding	chr6:29430021-29430081_+	1.32821477271795	0.164	0.849273755779435	0.425
A_23_P111112	ENSG00000137411	protein_coding	chr6:30894097-30894157_+	0.778611519210652	0.226	0.740505305399947	0.1755
A_23_P111132	ENSG00000204389	protein_coding	chr6:31785490-31785550_+	1.1828168998208	0.3644	1.12471085793858	0.3771
A_23_P111141	ENSG00000204463	protein_coding	chr6:31608033-31608171_-	1.01346842708211	0.885493	0.760964971502967	0.2586
A_23_P111194	ENSG00000124664	protein_coding	chr6:34506106-34506166_-	1.41942160421609	0.1045	1.0878247075952	0.580614
A_23_P111228	ENSG00000132423	protein_coding	chr6:99823815-99823868_-	9.13211075170744	0.000832533	4.13287588130447	0.000197887
A_23_P111273	ENSG00000145979	protein_coding	chr6:13307830-13307878_-	1.0477030801342	0.845784	1.09163475583297	0.789857
A_23_P111288	ENSG00000111843	protein_coding	chr6:10757007-10757046_+\chr6:10731155-10731215_+	0.482396499422432	0.0126801	1.14271309658115	0.901291
A_23_P111297	ENSG00000124787	protein_coding	chr6:4996217-4996277_-	0.761864888055943	0.259605	0.640071453973915	0.028
A_23_P111303	ENSG00000213079	protein_coding	chr6:155154866-155154926_+	0.927643084105887	0.499	0.823693762444495	0.415
A_23_P111343	ENSG00000029363	protein_coding	chr6:136582520-136582580_-	0.988415202773535	0.761394	0.62486122997756	0.0338
A_23_P111381	ENSG00000057663	protein_coding	chr6:106633865-106633925_-	0.868541530314681	0.4271	1.40246281612645	0.1795
A_23_P111452	ENSG00000133612	protein_coding	chr7:150841433-150841493_+	0.954057917364671	0.691011	1.0277625663565	0.886294
A_23_P111481	ENSG00000087087	protein_coding	chr7:100486218-100486278_+	0.732882760096343	0.1796	0.719756733166066	0.2112
A_23_P111487	ENSG00000087087	protein_coding	chr7:100485374-100485434_+	0.925143088569629	0.4441	0.784629926890125	0.3611
A_23_P111492	ENSG00000106330	protein_coding	chr7:100211121-100211181_+	1.5183651729504	0.0594	1.72629742038373	0.0291
A_23_P11160	ENSG00000129680	protein_coding	chrX:135299616-135299676_-	2.10280252832215	0.0067	1.48908446549015	0.176451
A_23_P111635	ENSG00000127952	protein_coding	chr7:75651168-75651210_-	0.900698753989084	0.191556	0.834068945864285	0.241476
A_23_P111701	ENSG00000127920	protein_coding	chr7:93555763-93555823_+	0.779215514371639	0.1522	1.14351400137611	0.931987
A_23_P111753	ENSG00000106591	protein_coding	chr7:42977127-42977187_+	0.664360842217422	0.1228	0.809302342424058	0.2811
A_23_P111797	ENSG00000179406	lncRNA	chr7:65841883-65841937_-	1.18586379506423	0.472998	0.706666387469847	0.1432
A_23_P111804	ENSG00000059378	protein_coding	chr7:139723945-139724005_-	0.491675517569129	0.0036	0.605454670637539	0.0436593
A_23_P111811	ENSG00000071243	protein_coding	chr7:120615260-120615320_+	0.74117871006078	0.1452	0.785439203056595	0.4001
A_23_P111843	ENSG00000106400	protein_coding	chr7:100867338-100867398_+	0.747006830660923	0.2021	0.810444848570666	0.3929
A_23_P111961	ENSG00000198042	protein_coding	chr8:33358374-33358434_+	0.609580269269772	0.0469	0.619639440812276	0.0286
A_23_P111981	ENSG00000180155	protein_coding	chr8:143852739-143852799_-	1.58320067339238	0.0358	1.55479583373424	0.0415
A_23_P111995	ENSG00000134013	protein_coding	chr8:23154785-23154845_-	0.968131025953988	0.5863	0.70571811068593	0.2456
A_23_P112026	ENSG00000131203	protein_coding	chr8:39785528-39785588_+	0.12980269030412	0.000295869	0.482884886231337	0.0354608
A_23_P112061	ENSG00000165102	protein_coding	chr8:43056896-43056956_+	0.977371892105581	0.692869	1.08923882717193	0.3752
A_23_P112103	ENSG00000104518	protein_coding	chr8:144644180-144644240_+	1.26444927575396	0.2165	1.21164566478977	0.422774
A_23_P112113	ENSG00000164961	protein_coding	chr8:126036807-126036867_-	1.07095338536625	0.6866	1.54225447307377	0.0565
A_23_P112135	ENSG00000067167	protein_coding	chr8:71485906-71485966_-	0.761826174970643	0.3551	1.19734369772545	0.4132
A_23_P11214	ENSG00000186416	protein_coding	chrX:118722566-118722626_-	1.09764069247249	0.900498	0.891497299240576	0.578
A_23_P112159	ENSG00000123908	protein_coding	chr8:141541946-141542006_-	1.38133881127069	0.045	1.01654993169725	0.845117
A_23_P112162	ENSG00000185000	protein_coding	chr8:145540234-145540294_-	0.990475569889371	0.899366	0.774024107056536	0.1685
A_23_P112201	ENSG00000107077	protein_coding	chr9:7175333-7175393_+	1.13943428952269	0.771189	1.73047507690969	0.0739033
A_23_P11224	ENSG00000169446	protein_coding	chrX:135044355-135044415_-	1.30000169793288	0.1595	1.17506145616251	0.2622
A_23_P112241	ENSG00000137094	protein_coding	chr9:34998280-34998340_+	0.440847811227711	0.000961255	0.335193612769771	0.000147294
A_23_P112251	ENSG00000242616	protein_coding	chr9:114432369-114432429_+	0.718743317898779	0.1396	0.98417324871359	0.857854
A_23_P112260	ENSG00000182625	pseudogene	chr11:10293565-10293622_-\chr15:58978793-58978853_+	0.960366527011055	0.638644	1.15787123268081	0.3558
A_23_P112341	ENSG00000178966	protein_coding	chr9:86618845-86618905_+	0.828006519499534	0.2665	1.13701866960124	0.520108
A_23_P11237	ENSG00000122728	protein_coding	chr9:32630076-32630136_-\chrX:70680544-70680604_+	1.27660364253451	0.352209	1.05337558042318	0.466301
A_23_P112397	ENSG00000159069	protein_coding	chr9:139835262-139835322_-	1.13985438782077	0.4354	1.15938621506628	0.3309
A_23_P112406	ENSG00000148308	protein_coding	chr9:135933511-135933571_+	1.00521630100302	0.919524	0.991957479505826	0.891734
A_23_P112412	ENSG00000136891	protein_coding	chr9:103064510-103064570_-	0.759123928625449	0.2379	0.853911525998013	0.3634
A_23_P112478	ENSG00000164978	protein_coding	chr9:34343182-34343242_+	0.941291833272123	0.4181	0.908322104669354	0.2309
A_23_P112482	ENSG00000165272	protein_coding	chr9:33441764-33441824_-	0.571203384524565	0.0430118	0.487291709852446	0.0089
A_23_P112531	ENSG00000167106	protein_coding	chr9:130703215-130703275_-	0.35121991658607	0.00460455	0.242267205083268	7.36471e-05
A_23_P112596	ENSG00000156110	protein_coding	chr10:76429969-76430029_+	0.306424829185255	9.09382e-05	0.562633521336269	0.0281249
A_23_P11262	ENSG00000185990	protein_coding	chrX:154613333-154613393_+\chrX:154116219-154116279_+\chrX:154686631-154686691_-	1.30240118426901	0.2141	0.875081354672526	0.450904
A_23_P112634	ENSG00000163683	protein_coding	chr4:39553261-39553321_-	1.54872504989218	0.0202	1.86218928237038	0.0067
A_23_P112652	ENSG00000182973	protein_coding	chr3:32815145-32815205_+	0.767841970739814	0.338907	0.786158379203014	0.227
A_23_P112774	ENSG00000184489	protein_coding	chr8:142441432-142441492_+	0.839968789701873	0.194988	0.474061271419622	0.00395517
A_23_P11279	ENSG00000101901	protein_coding	chrX:110931112-110931172_+	0.816563740554744	0.2371	1.40627930957742	0.1018
A_23_P112798	ENSG00000182809	protein_coding	chr14:105945805-105945957_+	0.788762818506269	0.2558	0.717515266989008	0.179
A_23_P112801	ENSG00000187446	protein_coding	chr15:41573978-41574038_+	0.730095576039352	0.1788	1.35433722733788	0.1746
A_23_P112825	ENSG00000205629	protein_coding	chr16:25182079-25182127_+	0.82859929086964	0.4273	1.04060872506145	0.493
A_23_P11286	ENSG00000126945	protein_coding	chrX:100668685-100668745_+	0.927946204973996	0.4731	1.01116011262266	0.6306
A_23_P11295	ENSG00000182712	protein_coding	chrX:154290161-154290221_-	0.733296706006704	0.3099	1.27001682919325	0.2
A_23_P112950	ENSG00000171681	protein_coding	chr12:14650946-14651006_+	1.12786500209247	0.637759	0.713188072804631	0.2886
A_23_P113005	ENSG00000169242	protein_coding	chr1:155106766-155106826_+	1.18891796789914	0.3538	1.04135450266364	0.758944
A_23_P113184	ENSG00000140718	protein_coding	chr16:54148112-54148172_+	0.957511461503946	0.765979	0.800301305782881	0.2287
A_23_P11331	ENSG00000180964	protein_coding	chrX:102507997-102508057_-	0.621019510592675	0.526975	0.930718926084819	0.694315
A_23_P113317	ENSG00000178467	protein_coding	chr3:49043251-49043507_+	0.658837719504417	0.0906	0.615495008439582	0.0362
A_23_P113417	ENSG00000185504	protein_coding	chr17:79507397-79507457_-	0.906847922087617	0.5839	0.721837905019201	0.1811
A_23_P113523	ENSG00000178605	protein_coding	chrY:171456-171516_-\chrX:221456-221516_-	0.810388860448725	0.312	0.714652949997565	0.159
A_23_P11353	ENSG00000182220	protein_coding	chrX:40464987-40465047_+	0.665610841427047	0.08	0.984725149760511	0.695896
A_23_P113623	ENSG00000174100	protein_coding	chr17:36478911-36478971_+	0.896519190547697	0.44245	1.00847807435071	0.975169
A_23_P113634	ENSG00000067955	protein_coding	chr16:67134629-67134689_+	0.78149376200959	0.272	1.07012233681097	0.896863
A_23_P11372	ENSG00000165704	protein_coding	chrX:133634513-133634573_+	0.83908245610246	0.4974	2.01168960694444	0.0352757
A_23_P113803	ENSG00000186625	protein_coding	chr6:149916223-149916283_-	1.26593468733072	0.1892	1.77158516357629	0.0104
A_23_P113825	ENSG00000148411	protein_coding	chr9:138903223-138903283_-	1.35611085185772	0.0712	1.44227560979893	0.0532
A_23_P11390	ENSG00000129862	protein_coding	chrY:16097712-16097772_-\chrY:16168717-16168777_+	1.60200787854734	0.0558	1.37412744064951	0.0738
A_23_P113972	ENSG00000090989	protein_coding	chr4:56768535-56768595_+	1.20872527720982	0.428079	0.909520464355346	0.4471
A_23_P114057	ENSG00000168758	protein_coding	chr2:97525522-97525582_-	1.86741392094559	0.0495812	0.891261800173926	0.459613
A_23_P114144	ENSG00000101997	protein_coding	chrX:49105690-49105996_+	0.937973800703642	0.649857	1.78726046256361	0.0092
A_23_P114155	ENSG00000068394	protein_coding	chrX:48970454-48970514_-	0.961682263416846	0.6344	1.12548597692999	0.5224
A_23_P114164	ENSG00000188021	protein_coding	chrX:56593052-56593112_+	2.02646784855487	0.0034	1.89707350623225	0.0052
A_23_P114185	ENSG00000156298	protein_coding	chrX:38546880-38547204_+	1.05536080853917	0.392375	1.2350101109536	0.385962
A_23_P114221	ENSG00000102054	protein_coding	chrX:16863009-16863069_-	0.555695254510118	0.0385	0.732300231306226	0.2025
A_23_P114232	ENSG00000123131	protein_coding	chrX:23700565-23700625_+	0.708016949302551	0.1908	0.637971773370671	0.0509
A_23_P114282	ENSG00000232119	protein_coding	chrX:119746089-119746149_+	1.10175717130609	0.6289	1.69912964328425	0.0407
A_23_P114405	ENSG00000123562	protein_coding	chrX:102930866-102930926_-	0.710556701243582	0.1032	0.610818295691228	0.0283
A_23_P114445	ENSG00000198934	protein_coding	chrX:75651238-75651298_+	1.1222180368954	0.939541	1.14532328722716	0.4943
A_23_P114466	ENSG00000092377	protein_coding	chrY:6955392-6955452_+	1.22511076606766	0.784504	0.994451683488327	0.423917
A_23_P1145	ENSG00000107951	protein_coding	chr10:30602475-30602535_-	0.525972491526379	0.048561	0.51110328268975	0.0039
A_23_P114656	ENSG00000116478	protein_coding	chr1:32799036-32799096_+	0.858811915762115	0.4423	0.799850578647999	0.2595
A_23_P114670	ENSG00000130762	protein_coding	chr1:3397478-3397538_+	1.32493668368825	0.265346	0.79036432164838	0.142
A_23_P114689	ENSG00000088280	protein_coding	chr1:23755286-23755346_-	1.72609349898864	0.252229	0.893070988140743	0.107492
A_23_P114740	ENSG00000000971	protein_coding	chr1:196801234-196801294_+\chr1:196716549-196716609_+	0.560847556631226	0.0732021	0.796306700223481	0.315493
A_23_P114774	ENSG00000163344	protein_coding	chr1:154897397-154897457_-	0.551002460538226	0.0355	0.617827717736638	0.0193
A_23_P114808	ENSG00000116353	protein_coding	chr1:29522509-29522753_-	0.943811802837243	0.6206	0.589207372065684	0.0222
A_23_P114826	ENSG00000116898	protein_coding	chr1:36921893-36921953_-	1.25299857688214	0.539611	0.980713919362069	0.49884
A_23_P114839	ENSG00000183386	protein_coding	chr1:38463396-38463456_-	0.627234989438666	0.0255	0.848647718466018	0.618584
A_23_P114903	ENSG00000173110	protein_coding	chr1:161496157-161496217_+	0.896826111234499	0.4725	0.897919276648643	0.420262
A_23_P114929	ENSG00000143158	protein_coding	chr1:167889228-167889288_-	0.606207609588085	0.0357	0.829411741550396	0.3982
A_23_P114947	ENSG00000116741	protein_coding	chr1:192781050-192781110_+	0.553291825864697	0.015	0.234344201387476	6.7243e-05
A_23_P114952	ENSG00000116857	protein_coding	chr1:201104571-201104631_-	0.858458504043533	0.104893	0.788935610125871	0.1598
A_23_P115022	ENSG00000179178	protein_coding	chr1:43739604-43739664_+	1.65333061904577	0.0386	1.24329575675131	0.242197
A_23_P115036	ENSG00000117408	protein_coding	chr1:44432619-44432679_+	1.21397224245709	0.3	1.273954022293	0.151725
A_23_P115064	ENSG00000143320	protein_coding	chr1:156669578-156669638_-	1.2556130571162	0.2779	0.718908515854864	0.1539
A_23_P11507	ENSG00000036549	protein_coding	chr1:78030561-78030621_-	0.838212070374969	0.2532	1.01855633780113	0.4086
A_23_P115105	ENSG00000055070	protein_coding	chr1:16722797-16722857_+	0.928998058800261	0.5118	1.12590160866415	0.4695
A_23_P115124	ENSG00000154370	protein_coding	chr1:228581656-228581716_-	1.12932844033813	0.433474	0.695969914303627	0.083
A_23_P115137	ENSG00000134248	protein_coding	chr1:110944106-110944166_-	0.992930445366092	0.928565	1.58010390384368	0.0542
A_23_P115149	ENSG00000116455	protein_coding	chr1:111983402-111983462_-	0.873883693742158	0.3448	0.860492638863659	0.3167
A_23_P115167	ENSG00000197147	protein_coding	chr1:90058367-90058427_+	0.566121282068939	0.0346225	0.797716872909375	0.332028
A_23_P115215	ENSG00000163159	protein_coding	chr1:151149095-151149155_-	0.976285985232488	0.7191	0.819071655941226	0.3304
A_23_P115223	ENSG00000143575	protein_coding	chr1:154248145-154248205_+	0.678655111747512	0.1401	0.598339298764584	0.0376
A_23_P115261	ENSG00000135744	protein_coding	chr1:230838530-230838590_-	0.882475046045246	0.4654	0.791852565500809	0.2458
A_23_P115316	ENSG00000186283	protein_coding	chr1:179064717-179064777_+	1.01645834346566	0.52041	1.13915481161076	0.629301
A_23_P115331	ENSG00000126705	protein_coding	chr1:27861241-27861300_-	1.35729052232089	0.1135	1.21212056314079	0.1693
A_23_P115346	ENSG00000143486	protein_coding	chr1:206770471-206770531_-	0.893561829246706	0.716847	0.560279434558159	0.0053
A_23_P115356	ENSG00000053371	protein_coding	chr1:19630592-19630652_-	0.636560408756649	0.0901	0.65514577266627	0.0771
A_23_P115366	ENSG00000162368	protein_coding	chr1:47843917-47843977_+	0.496958151339372	0.0075	1.07835528667055	0.865811
A_23_P11543	ENSG00000179163	protein_coding	chr1:24171849-24171909_-	0.535234336963833	0.00755556	0.768493008583608	0.206253
A_23_P115467	ENSG00000196420	protein_coding	chr1:153512587-153512647_-	0.967468227065277	0.838662	1.56649308524257	0.0344015
A_23_P115482	ENSG00000077152	protein_coding	chr1:202300905-202300965_-	0.836255223169169	0.3625	0.866375638799372	0.369903
A_23_P115492	ENSG00000143494	protein_coding	chr1:213163327-213163387_+	1.57675013463606	0.165	1.14627463023938	0.311885
A_23_P115573	ENSG00000198892	protein_coding	chr1:201861365-201861425_+	0.925524381819969	0.4967	1.05445696063475	0.5838
A_23_P115683	ENSG00000166189	protein_coding	chr10:103827674-103827734_+	0.817468190442806	0.2383	1.65022146214584	0.0258
A_23_P115762	ENSG00000122882	protein_coding	chr10:74894320-74894380_-	0.976110373449903	0.523705	0.97859555405027	0.909723
A_23_P115792	ENSG00000107679	protein_coding	chr10:124189515-124189575_+	0.575817633428199	0.0173	0.462562827628932	0.0026
A_23_P115824	ENSG00000096746	protein_coding	chr10:70102701-70102761_+	0.634667526413242	0.0123	0.460521562474068	0.0011
A_23_P115842	ENSG00000060339	protein_coding	chr10:70550997-70551057_+	0.890778396333071	0.4626	1.34942787594809	0.2305
A_23_P115922	ENSG00000148730	protein_coding	chr10:72183524-72183584_+	0.715797776232554	0.0481	0.690243808733468	0.1183
A_23_P115955	ENSG00000197345	protein_coding	chr11:68658830-68660384_-	0.618421473417275	0.062	1.00309773615761	0.867522
A_23_P116037	ENSG00000149809	protein_coding	chr11:64880990-64881050_+	1.11873351301536	0.566533	0.734475153189402	0.2806
A_23_P116091	ENSG00000254986	protein_coding	chr11:66272182-66272242_+	1.05216809914179	0.834346	1.9130710464654	0.0142
A_23_P116168	ENSG00000170903	protein_coding	chr11:105879040-105879100_-	0.518685490881087	0.015537	1.03383678459498	0.344799
A_23_P116207	ENSG00000118096	protein_coding	chr11:118416172-118416530_-	0.80535885525879	0.2709	0.812244434448167	0.3504
A_23_P116235	ENSG00000110492	protein_coding	chr11:46405230-46405290_+	1.11694351488148	0.5899	0.689458876825971	0.0914
A_23_P116264	ENSG00000154146	protein_coding	chr11:124616791-124616851_+	1.52129840212652	0.0299	1.26633444600147	0.354123
A_23_P11629	ENSG00000143001	protein_coding	chr1:55457775-55457835_+	1.6908566186809	0.0277131	1.02788966479983	0.816037
A_23_P116414	ENSG00000176485	protein_coding	chr11:63342321-63342381_-	0.7292450579651	0.58284	0.668199078452748	0.0332
A_23_P11652	ENSG00000162607	protein_coding	chr1:62917269-62917329_+	0.802226014057108	0.3492	1.06620987483901	0.726448
A_23_P116602	ENSG00000118369	protein_coding	chr11:77925674-77925734_+	1.46613199272971	0.0892	2.07619767040626	0.002
A_23_P11664	ENSG00000116754	protein_coding	chr1:70716493-70716553_+	0.788805146787414	0.3278	0.70169267217459	0.1427
A_23_P116743	ENSG00000212694	lncRNA	chr12:122233206-122233266_-	1.46589266233314	0.0984	1.23569662301034	0.165976
A_23_P116797	ENSG00000139637	protein_coding	chr12:53700511-53700571_+	1.04995227322156	0.6566	0.929772147489866	0.68
A_23_P116829	ENSG00000177889	protein_coding	chr12:93802632-93802692_-	0.643849636828124	0.0337	1.06260524652426	0.821484
A_23_P116840	ENSG00000123395	protein_coding	chr12:52470599-52470659_+	0.885105703154401	0.476	1.11504366561434	0.4652
A_23_P11685	ENSG00000116711	protein_coding	chr1:186957651-186957711_+	0.987997813237018	0.921267	1.70143098574966	0.00853922
A_23_P116890	ENSG00000197870	protein_coding	chr12:11420925-11420978_-\chr12:11420351-11420411_-	1.4294296834056	0.0855	1.21555766733326	0.3235
A_23_P116898	ENSG00000175899	protein_coding	chr12:9221358-9221418_-	1.04396929401154	0.653297	0.802869511455096	0.2912
A_23_P116942	ENSG00000089692	protein_coding	chr12:6887405-6887462_+	0.657491988375004	0.114779	0.723650281326457	0.11362
A_23_P117037	ENSG00000050426	protein_coding	chr12:51453754-51453814_+	0.978859906158016	0.6359	0.767843024563457	0.3534
A_23_P11705	ENSG00000160058	protein_coding	chr1:32830910-32830970_-	1.03959653020595	0.6525	1.10872378257996	0.4136
A_23_P117068	ENSG00000139343	protein_coding	chr12:96259099-96259159_+	0.642103662888214	0.1217	0.70350899438319	0.0727
A_23_P117082	ENSG00000013583	protein_coding	chr12:13127846-13127906_-	0.768807879559358	0.0858143	0.724065223418399	0.150034
A_23_P117146	ENSG00000110851	protein_coding	chr12:108127198-108127258_-	1.13271401071106	0.3411	1.01467085323907	0.653989
A_23_P117157	ENSG00000136143	protein_coding	chr13:48517387-48517447_-	1.75014283051427	0.514158	1.75673230460753	0.0251278
A_23_P117163	ENSG00000136144	protein_coding	chr13:50106368-50106428_-	0.737301495259422	0.0715	1.70343079355868	0.0282
A_23_P117225	ENSG00000134899	protein_coding	chr13:103527949-103528009_+	0.962796625850091	0.914403	0.87675896086989	0.5212
A_23_P117298	ENSG00000057593	protein_coding	chr13:113773877-113773937_+	1.74127313448879	0.1051	1.47056121051352	0.365
A_23_P117363	ENSG00000170099	protein_coding	chr14:94770629-94770689_-	1.5246170837887	0.0456	1.26628908559452	0.197
A_23_P117380	ENSG00000140067	protein_coding	chr14:94395783-94395843_+	1.17609259150299	0.3279	1.05939825434222	0.752444
A_23_P117424	ENSG00000100897	protein_coding	chr14:24592810-24592870_+	1.00014562729992	0.467553	1.1309301249291	0.704921
A_23_P117494	ENSG00000100714	protein_coding	chr14:64926495-64926555_+	0.835231627902512	0.3601	0.826542475825029	0.3787
A_23_P117546	ENSG00000100485	protein_coding	chr14:50584322-50584382_-	1.93835795929731	0.000886327	1.54500254863194	0.1012
A_23_P117558	ENSG00000100442	protein_coding	chr14:45587268-45587328_-	0.57799945092766	0.0088	0.923621759550648	0.3725
A_23_P117582	ENSG00000140044	protein_coding	chr14:75937081-75937141_+	1.17681456924696	0.3802	1.25488975346979	0.2016
A_23_P117599	ENSG00000100591	protein_coding	chr14:77928984-77929044_+	0.814749035855922	0.2815	0.787355480074902	0.3307
A_23_P117683	ENSG00000242028	protein_coding	chr15:44093978-44094038_+	0.875831582582243	0.4211	0.818791036121124	0.4841
A_23_P117734	ENSG00000183060	protein_coding	chr15:100267768-100267828_-	0.781166378251657	0.297152	0.783698293518999	0.0729
A_23_P11774	ENSG00000183520	protein_coding	chr1:38489281-38489341_+	0.889888216127752	0.2568	1.16578942498831	0.2068
A_23_P117778	ENSG00000138629	protein_coding	chr15:74743169-74743805_-	1.04087311494876	0.678	0.78930744070545	0.2853
A_23_P117797	ENSG00000128973	protein_coding	chr15:68499948-68500008_-	1.35085695559035	0.927909	0.419211353919415	0.0023
A_23_P117852	ENSG00000166803	protein_coding	chr15:64657846-64657906_-	0.923146270013673	0.3531	2.14669242609997	0.392158
A_23_P117928	ENSG00000140320	protein_coding	chr15:40760130-40760190_+	0.713512329462005	0.1974	0.651217931766697	0.0625
A_23_P117933	ENSG00000140905	protein_coding	chr16:81115982-81116042_-	1.13276352550704	0.4221	1.15166146338351	0.346022
A_23_P117971	ENSG00000113712	Poorly Annotated	chr16:58588341-58588401_+\chr5:148879091-148879126_+	1.03754736083728	0.768643	0.631186925177301	0.0462
A_23_P117980	ENSG00000140854	protein_coding	chr16:57789932-57790281_+	0.894575812371876	0.4683	1.0557644900414	0.945112
A_23_P11800	ENSG00000162545	protein_coding	chr1:20809400-20809460_-	0.975418115087259	0.715886	0.798545126887918	0.3876
A_23_P118002	ENSG00000140740	protein_coding	chr16:21994577-21994637_+	0.715936233635317	0.2313	0.809895909341668	0.3452
A_23_P118025	ENSG00000167261	protein_coding	chr16:68021526-68021586_-	1.07889398815877	0.641357	1.26298060071951	0.312208
A_23_P118038	ENSG00000102898	protein_coding	chr16:67904757-67904817_+	0.892012494427833	0.5479	0.859236579242892	0.4709
A_23_P118061	ENSG00000217555	protein_coding	chr16:66592128-66592188_+	0.800827543826887	0.2997	0.885659564553987	0.5702
A_23_P118105	ENSG00000140990	protein_coding	chr16:2011548-2011608_+	0.796271728534744	0.2337	1.0697124313883	0.5801
A_23_P118122	ENSG00000076344	protein_coding	chr16:318323-318383_-	2.13741044120261	0.00300352	0.980170530177446	0.775354
A_23_P118150	ENSG00000170540	protein_coding	chr16:18803752-18803812_-	1.15108315034681	0.893907	1.09465204628014	0.582273
A_23_P118174	ENSG00000166851	protein_coding	chr16:23700969-23701212_+	1.20477581870217	0.3165	0.935322297154054	0.66082
A_23_P118203	ENSG00000162078	protein_coding	chr16:2882112-2882172_+	0.751565003276828	0.1607	1.14275810807718	0.467159
A_23_P118246	ENSG00000131153	protein_coding	chr16:85711653-85711713_-	0.830562502693566	0.290325	0.889577809461472	0.293848
A_23_P118289	ENSG00000099385	protein_coding	chr16:30904017-30904169_-	0.816226818299098	0.438	1.05277256971337	0.5166
A_23_P118300	ENSG00000180185	protein_coding	chr16:1878331-1878391_+	0.646587466061573	0.1193	0.90344529644686	0.4287
A_23_P118306	ENSG00000103423	protein_coding	chr16:4506391-4506451_+	0.647833876001437	0.1157	0.54468614803996	0.0116
A_23_P118353	ENSG00000167881	protein_coding	chr17:74040008-74041401_-	0.589069431453251	0.1264	0.786653940377594	0.2662
A_23_P118392	ENSG00000108551	protein_coding	chr17:17397786-17397846_-	1.52830719632138	0.0307	1.19378269119179	0.168013
A_23_P118406	ENSG00000178927	protein_coding	chr17:80400903-80400963_-	1.58954070264913	0.0179	1.27081102832259	0.1657
A_23_P118427	ENSG00000034152	protein_coding	chr17:21217987-21218047_+	1.53968476423537	0.0353	1.00914874725089	0.918576
A_23_P11843	ENSG00000170382	protein_coding	chr1:204586352-204586412_-	1.79832054810084	0.1673	1.43323541861069	0.0382
A_23_P118462	ENSG00000108963	protein_coding	chr17:1946600-1946660_+	0.674715605694679	0.1173	1.32205219898256	0.204
A_23_P118516	ENSG00000171928	protein_coding	chr17:15440978-15441038_-\chr17:18709282-18709342_+	0.724140702028629	0.0452	1.00636662165029	0.996469
A_23_P118607	ENSG00000108825	protein_coding	chr17:41107856-41107916_-	0.565291618509396	0.0328	0.493951806332259	0.00819917
A_23_P11862	ENSG00000000460	protein_coding	chr1:169822109-169822169_+	0.673149502799009	0.0672	0.833718950863051	0.4075
A_23_P118633	ENSG00000006282	protein_coding	chr17:48632984-48633044_+	1.15573147891985	0.4639	0.937314409842677	0.6744
A_23_P118643	ENSG00000151247	protein_coding	chr4:99801520-99801580_-	0.745228591260352	0.1094	1.10606341834483	0.4322
A_23_P118690	ENSG00000010244	protein_coding	chr17:30696955-30697015_+	0.655688906432467	0.0808	1.07906624730687	0.757182
A_23_P118722	ENSG00000141505	protein_coding	chr17:7076780-7076840_-	1.10408463743861	0.723399	1.02145245446215	0.389603
A_23_P118749	ENSG00000072849	protein_coding	chr17:5377912-5377972_-	1.03428635020566	0.6791	1.1279657772077	0.4476
A_23_P118815	ENSG00000089685	protein_coding	chr17:76220719-76220779_+	0.95694307003796	0.378015	1.16069854105477	0.707392
A_23_P118834	ENSG00000131747	protein_coding	chr17:38545708-38545768_-	0.904813479743098	0.841244	1.03431080144912	0.986039
A_23_P118888	ENSG00000007168	protein_coding	chr17:2583480-2583540_+	1.39820421172376	0.17	0.994468607560189	0.885691
A_23_P119042	ENSG00000105374	protein_coding	chr19:51874945-51875005_-	0.696304762340557	0.162569	1.70578103721433	0.183391
A_23_P119095	ENSG00000104881	protein_coding	chr19:45883012-45883072_-	1.11762764840316	0.5357	0.879037970627018	0.4788
A_23_P119102	ENSG00000125753	protein_coding	chr19:46029737-46029797_+	1.48204897554458	0.0589	1.32707503475855	0.1375
A_23_P119130	ENSG00000105372	protein_coding	chr19:42364864-42365189_+	0.36024221991916	0.000710215	0.590302135913092	0.0603362
A_23_P119141	ENSG00000079999	protein_coding	chr19:10597261-10597321_-	0.972853244382302	0.6512	1.1808025327498	0.2038
A_23_P119143	ENSG00000105376	protein_coding	chr19:10407321-10407381_+	1.71289931654516	0.0234	4.77399088639238	0.000126801
A_23_P119196	ENSG00000127528	protein_coding	chr19:16438245-16438305_+	0.853855391491817	0.3821	0.569130772916499	0.0223
A_23_P119214	ENSG00000104980	protein_coding	chr19:7997510-7997542_-	0.773623614515031	0.2541	0.737810508678182	0.1368
A_23_P119222	ENSG00000104918	protein_coding	chr19:7734715-7734775_+	3.21124025680356	0.00457701	16.4119209398216	0.000473903
A_23_P119254	ENSG00000105011	protein_coding	chr19:14230637-14230697_-	0.625365030863792	0.0344	0.473538847940287	0.0021
A_23_P119266	ENSG00000105612	protein_coding	chr19:12987040-12987100_-	1.08517597141583	0.566801	0.850983272820998	0.3503
A_23_P119295	ENSG00000130159	protein_coding	chr19:11616891-11616951_-	0.728680296559557	0.1674	0.885049461495193	0.4604
A_23_P119337	ENSG00000169136	protein_coding	chr19:50436753-50436813_+	1.06611608032885	0.926896	1.03177351446997	0.627819
A_23_P119353	ENSG00000105538	protein_coding	chr19:49223904-49223964_-	0.924166490760418	0.5768	0.782485623387127	0.2533
A_23_P119362	ENSG00000142227	protein_coding	chr19:48832674-48832734_+	0.64441537700923	0.069	0.588223493683163	0.035
A_23_P119377	ENSG00000105443	protein_coding	chr19:48975592-48975652_+	0.609869326215321	0.0378	0.653227231608722	0.0586
A_23_P119418	ENSG00000105176	protein_coding	chr19:30503227-30503287_+	0.506831232344318	0.0174	0.555838577302389	0.0117
A_23_P119448	ENSG00000105063	protein_coding	chr19:55741597-55741657_-	1.76188061733266	0.0578	0.815286983904373	0.3641
A_23_P119562	ENSG00000197766	protein_coding	chr19:863246-863306_+	0.219964758163872	0.00326545	0.882007544590862	0.272297
A_23_P119593	ENSG00000105131	protein_coding	chr19:15337810-15337870_-	1.37590153641604	0.1304	0.847619249763492	0.4007
A_23_P119617	ENSG00000105705	protein_coding	chr19:19388627-19388687_-	0.988754262294167	0.868109	0.910811090978274	0.5969
A_23_P119627	ENSG00000186010	protein_coding	chr19:19638091-19638151_+	0.621719614384339	0.0659	1.00568416552373	0.951896
A_23_P119698	ENSG00000167775	protein_coding	chr19:8367334-8367394_-	1.04595129329921	0.6831	0.835556613162063	0.3942
A_23_P119714	ENSG00000105393	protein_coding	chr19:17389869-17389929_+	0.703786059277023	0.1635	1.028642844419	0.73793
A_23_P1199	ENSG00000165609	protein_coding	chr10:12214784-12214844_-	1.02365017514205	0.649593	1.03306243344427	0.873549
A_23_P119907	ENSG00000163516	protein_coding	chr2:220100232-220100292_+	1.31152954281248	0.2512	1.03909720168022	0.674188
A_23_P119916	ENSG00000115596	protein_coding	chr2:219738851-219738911_+	1.35440920961422	0.14	1.09582127528434	0.501241
A_23_P119923	ENSG00000158158	protein_coding	chr2:97477480-97477540_+	0.772091424480115	0.1079	0.779768339635059	0.1802
A_23_P119943	ENSG00000115457	protein_coding	chr2:217529085-217529145_+	2.21940604906484	0.405299	0.78134509262117	0.2727
A_23_P11995	ENSG00000117450	protein_coding	chr1:45980294-45980589_-	0.721897546704804	0.191	1.1308398714495	0.79588
A_23_P119964	ENSG00000115816	protein_coding	chr2:37429941-37430001_-	1.16968323683023	0.615089	1.7579260459198	0.0255
A_23_P120002	ENSG00000135899	protein_coding	chr2:231042260-231042320_-	0.78889165077347	0.2811	0.549503478079484	0.0115
A_23_P120056	ENSG00000114993	protein_coding	chr2:74653349-74653409_-	1.15974663739638	0.4301	0.874100414912994	0.561898
[truncated: 12,265 more rows]
